# Supplementary material
Source: HighWire-hosted journal article supplement (https://openres.ersjournals.com/highwire/filestream/11242/field_highwire_adjunct_files/5/ERJOR-00096-2015_TableS2.xls)
Supplement: ERJOR-00096-2015_TableS2.xls [file ERJOR-00096-2015_TableS2.xls]

## Sheet: Bacteria
Species	PSAW1.1	PSAW1.2	PSAW1.3	PSAW1.4	PSAW2.1	PSAW2.2	PSBW1.1	PSBW1.2	PSBW1.3	PSBW1.4	PSBM3.1	PSCW5.1	PSCW5.2	PSCW5.3	PSCM2.1	PSAM10.1	PSAM10.2	PSAM10.3	PSAW11.1	PSAW11.2	PSAW10.1	PSBM10.1	PSBW12.1	PSCW13.1	PIAM2.1	PIAM2.2	PIAM2.3	PIAM5.1	PIAM5.2	PIAM5.3	PIAM5.4	PIAM10.1	PIAW11.1	PIBM5.1	PIBM5.2	PIBM5.3	PIBM5.4	PICM2.1	PICM2.2	PICM2.3	PICW4.1	PICW4.2	PICW4.3	PICW7.1	PICM6.1	PIAM11.1	PIAM12.1	PIAW10.1	PIBM10.1
'Nostoc azollae'	2	4	34	5	0	0	0	0	0	0	0	0	0	0	0	0	0	0	0	0	0	0	1	6	1	1	5	0	0	3	0	0	4	0	0	0	0	0	1	0	0	0	0	0	0	0	0	0	0
Acaryochloris marina	0	10	23	0	0	0	0	0	0	0	0	0	0	1	0	0	0	0	0	0	6	0	1	1	1	0	3	0	0	0	0	0	0	0	1	0	0	0	0	0	0	0	2	0	0	1	0	0	0
Acetobacterium woodii	11	18	84	14	0	0	1	0	3	1	0	0	0	3	0	0	0	0	0	0	31	0	1	7	2	5	12	0	0	3	0	1	13	0	2	0	0	0	1	0	0	0	23	0	0	3	0	0	2
Acetohalobium arabaticum	8	18	72	15	0	0	0	0	0	1	0	0	0	0	0	0	0	1	0	0	20	0	2	13	1	15	13	0	0	9	0	0	5	0	0	0	0	0	0	0	0	5	2	0	0	0	0	0	2
Acholeplasma laidlawii	14	25	122	35	0	0	3	1	3	4	0	0	0	2	0	0	0	0	0	0	24	0	3	10	3	9	56	0	3	5	0	5	14	0	5	0	0	0	1	0	0	0	3	0	0	3	0	0	8
Achromobacter xylosoxidans	7	44	189	0	3	0	0	0	4	0	427	7	32	13	0	0	0	0	0	0	12	0	0	0	4	62	752	7	10	0	0	0	16	58	785	153	39	0	0	0	0	0	25	0	133	10	0	75	17
Acidaminococcus fermentans	38	41	229	36	0	0	1	0	10	3	0	0	0	0	0	0	0	0	0	0	71	0	0	20	0	8	15	2	0	3	0	0	20	0	0	0	0	0	0	2	0	2	10	0	0	0	0	0	0
Acidaminococcus intestini	93	98	1564	43	5	0	2	0	5	0	0	0	0	0	0	0	0	0	0	0	103	2	5	13	6	0	12	0	0	0	0	0	109	0	2	0	0	0	2	2	0	0	0	0	0	0	0	0	28
Acidianus hospitalis	1	0	89	0	0	0	0	0	0	0	0	0	0	0	0	0	0	0	0	0	0	0	0	0	0	0	14	0	0	0	0	0	0	0	0	0	0	0	0	0	0	104	771	0	0	0	0	0	0
Acidilobus saccharovorans	0	0	11	0	0	0	0	0	0	0	0	0	0	0	0	0	0	0	0	0	0	0	0	0	0	0	0	0	0	0	0	0	0	0	0	0	0	0	0	0	0	0	0	0	0	0	0	0	0
Acidimicrobium ferrooxidans	0	0	498	32	0	0	0	0	0	0	0	0	0	0	0	0	0	0	0	0	0	0	0	11	0	0	0	0	0	0	0	0	8	0	0	0	0	0	18	0	0	0	0	0	0	0	0	0	38
Acidiphilium cryptum	0	9	58	0	0	0	0	0	0	0	0	0	0	0	0	0	0	0	0	0	0	0	0	0	0	0	0	0	0	0	0	0	0	0	0	0	0	0	0	0	0	0	0	0	0	0	0	0	0
Acidiphilium multivorum	0	0	24	0	0	0	0	0	0	0	0	0	0	2	0	0	0	0	0	0	0	0	0	0	0	0	0	0	0	0	0	0	0	0	0	0	0	0	0	0	0	0	0	0	0	0	0	0	0
Acidithiobacillus caldus	0	0	0	0	0	0	0	0	0	0	0	0	0	0	0	0	0	0	0	0	10	0	0	0	0	0	3	0	0	0	0	0	0	0	0	0	0	0	0	0	0	0	0	0	0	0	0	0	0
Acidithiobacillus ferrivorans	5	6	26	0	0	0	0	0	5	0	32	0	0	0	0	0	0	0	0	0	10	0	0	0	0	0	3	0	0	0	0	0	0	22	29	49	17	0	0	0	0	0	0	0	0	0	0	46	3
Acidobacterium capsulatum	13	16	93	8	1	0	0	0	0	0	0	0	0	0	0	0	0	0	0	0	6	0	0	3	0	0	15	0	0	0	0	0	4	0	0	0	0	0	0	0	0	0	0	0	0	0	0	0	3
Acidothermus cellulolyticus	0	160	599	29	17	0	0	0	15	0	0	0	0	0	0	22	0	6	0	0	13	0	0	26	13	0	87	0	0	0	0	0	0	0	20	0	0	0	0	0	0	0	0	0	0	14	0	0	81
Acidovorax avenae	22	52	214	13	25	0	0	0	0	0	0	0	0	0	0	8	0	14	0	0	0	0	0	0	0	8	34	0	0	0	0	0	16	0	24	0	0	0	0	0	0	0	29	0	0	0	0	0	33
Acidovorax citrulli	13	36	166	14	0	0	0	0	0	0	0	8	0	0	0	0	0	14	0	0	0	0	0	0	4	8	21	0	0	0	0	0	14	29	23	0	20	0	0	0	121	247	0	0	0	0	0	0	14
Acidovorax ebreus	0	23	71	0	0	0	0	0	0	0	12	22	0	9	0	0	0	0	0	0	0	0	0	0	0	0	0	0	0	0	0	0	56	76	48	91	57	0	0	0	0	0	24	0	0	0	0	0	0
Acidovorax sp.	0	10	53	0	0	0	0	0	0	0	759	264	128	73	0	0	0	0	0	0	0	0	0	7	0	20	6	0	0	0	0	0	0	162	248	299	103	0	0	7	7	11	51	6	2	0	0	77	5
Aciduliprofundum boonei	0	0	13	3	0	0	0	0	0	0	0	0	0	0	0	0	0	0	0	0	2	0	0	2	0	0	3	0	0	0	0	0	0	0	0	0	0	0	0	0	0	0	4	0	0	0	0	0	0
Acinetobacter baumannii	0	0	25	0	1	0	1	0	0	0	0	1	0	3	0	0	0	0	0	0	5	0	0	2	2	0	4	7	2	0	0	0	3	3	5	2	1	6	4	4	2	1	70	0	0	0	6	0	2
Acinetobacter calcoaceticus	0	11	38	7	0	0	0	0	0	0	0	0	0	0	0	0	0	0	0	0	0	0	1	0	0	0	4	0	0	0	0	0	7	0	0	0	0	0	0	0	0	0	9	0	0	0	0	0	1
Acinetobacter oleivorans	0	9	44	8	0	0	0	0	0	0	0	0	0	0	0	0	0	0	0	0	8	0	0	0	1	0	6	0	0	0	0	0	0	0	0	0	0	0	0	0	0	0	0	0	0	1	0	0	1
Acinetobacter sp.	0	4	33	12	0	0	0	0	0	0	0	0	0	0	0	0	0	0	0	0	4	0	0	7	0	0	8	0	0	0	0	0	3	0	0	0	0	0	1	0	0	0	11	0	0	0	0	0	0
Actinobacillus pleuropneumoniae	0	0	55	0	0	0	1	5	0	13	0	0	0	0	9	0	0	5	0	0	16	9	1	14	0	0	0	0	0	0	0	0	14	0	22	6	0	0	1	0	0	0	5	0	0	0	0	0	0
Actinobacillus succinogenes	0	0	57	0	0	0	0	0	2	5	0	0	0	0	3	0	0	7	0	0	17	1	0	8	0	2	9	0	0	0	0	0	16	0	6	0	0	0	2	1	0	0	9	0	0	1	0	0	3
Actinoplanes missouriensis	89	323	1128	45	34	5	0	3	13	0	0	4	0	0	0	8	0	7	0	0	14	0	0	26	5	19	121	5	0	0	0	0	9	4	8	12	0	0	8	4	0	3	4	0	0	14	0	0	124
Actinosynnema mirum	139	391	1551	71	32	0	6	0	22	9	0	0	0	5	0	18	0	7	0	0	0	0	0	25	4	31	170	7	0	0	0	0	16	10	29	24	0	0	14	0	0	7	15	0	0	9	0	0	178
Aerococcus urinae	28	53	184	34	3	0	4	5	13	12	0	1	0	0	0	1	0	22	0	0	66	0	8	21	18	24	172	5	2	7	0	5	92	0	13	1	0	0	7	2	0	4	0	0	0	21	0	0	16
Aeromonas hydrophila	0	0	0	0	6	0	0	0	3	0	0	0	0	0	0	0	0	0	0	0	5	0	0	0	0	0	19	0	0	0	0	0	0	0	0	0	0	0	0	0	0	0	5	0	0	0	0	0	0
Aeromonas salmonicida	0	0	0	0	0	0	0	0	0	0	0	0	0	0	0	0	0	0	0	0	0	0	0	0	0	0	6	0	0	0	0	0	0	0	0	0	0	0	0	0	0	0	0	0	0	0	0	0	0
Aeromonas veronii	0	0	0	0	0	0	0	0	2	0	0	0	0	0	0	0	0	0	0	0	0	0	2	0	5	0	7	0	0	0	0	0	0	0	0	0	0	0	0	0	0	0	8	0	0	2	0	0	0
Aeropyrum pernix	0	0	15	0	0	0	0	0	0	0	0	0	0	0	0	0	0	0	0	0	0	0	0	0	0	0	0	0	0	0	0	0	0	0	0	0	0	0	0	0	0	0	0	0	0	0	0	0	0
Aggregatibacter actinomycetemcomitans	0	0	20	0	0	0	1	0	0	6	0	0	0	17	30	0	1	8	0	0	3	9	0	7	0	0	1	0	0	0	0	0	17	0	17	17	0	0	0	0	0	0	8	0	0	0	0	0	0
Aggregatibacter aphrophilus	0	0	50	0	2	0	5	5	3	26	0	3	0	0	44	0	5	55	0	1	13	30	0	27	14	9	15	0	2	0	0	0	79	0	393	110	0	0	3	0	0	2	4	1	0	0	0	0	3
Agrobacterium radiobacter	0	30	81	2	0	0	0	0	0	0	0	0	0	0	0	0	0	1	0	0	1	0	0	0	0	0	4	0	0	0	0	0	2	0	0	0	0	0	0	0	0	0	0	0	0	0	0	0	9
Agrobacterium sp.	0	0	38	0	0	0	0	0	0	0	0	0	0	0	0	0	0	0	0	0	0	0	0	0	0	0	0	0	0	0	0	0	0	0	0	0	0	0	0	0	0	0	0	0	0	0	0	0	0
Agrobacterium tumefaciens	0	0	53	0	0	0	0	0	0	0	0	0	0	0	0	0	0	0	0	0	0	0	0	0	0	0	0	0	0	1	0	0	0	0	0	0	0	0	0	0	0	0	0	0	0	0	0	0	8
Agrobacterium vitis	0	0	26	0	0	0	0	0	0	0	0	0	0	0	0	0	0	0	0	0	0	0	0	0	0	0	0	0	0	0	0	0	0	0	0	0	0	0	0	0	0	0	0	0	0	0	0	0	0
Akkermansia muciniphila	10	10	76	8	0	0	0	0	0	0	0	0	0	0	0	6	0	0	0	0	9	0	0	7	0	3	13	0	0	0	0	0	7	0	0	0	0	0	0	0	0	0	2	0	0	0	0	0	7
Alcanivorax borkumensis	0	0	17	0	0	0	0	0	0	0	0	0	0	0	0	2	0	0	0	0	4	0	0	2	0	0	5	0	2	0	0	0	4	3	5	9	2	0	0	0	0	0	5	0	0	0	0	0	3
Alicycliphilus denitrificans	0	32	114	0	21	9	0	0	0	0	487	271	153	102	0	0	0	0	0	0	0	0	0	0	0	32	32	0	0	0	0	0	38	182	223	309	93	0	0	0	35	64	268	0	5	0	0	60	27
Alicyclobacillus acidocaldarius	21	25	220	26	0	0	0	0	0	0	5	0	0	0	0	23	0	0	0	0	22	0	0	15	0	16	13	0	0	0	0	7	5	0	0	0	0	0	0	0	0	0	48	0	0	0	0	0	4
Aliivibrio salmonicida	4	10	33	2	0	0	0	0	0	0	0	0	0	0	0	0	0	0	0	0	9	0	0	2	2	0	4	0	0	0	0	0	9	0	1	0	0	0	0	0	0	0	1	0	0	0	0	0	4
Alkalilimnicola ehrlichii	11	98	265	0	0	0	0	0	0	0	0	0	0	0	0	0	0	0	0	0	5	0	0	0	0	0	29	0	0	0	0	0	0	0	0	0	0	0	0	0	0	0	0	0	0	0	0	0	32
Alkaliphilus metalliredigens	0	11	81	22	1	0	0	1	0	0	0	0	0	0	0	0	0	0	0	0	0	1	1	4	0	0	0	0	0	0	0	0	12	0	0	0	0	0	0	0	0	2	3	0	0	0	0	0	2
Alkaliphilus oremlandii	13	25	165	31	1	0	2	0	1	3	0	0	0	7	0	0	0	2	0	0	36	2	0	14	3	4	15	0	0	3	0	0	16	0	10	0	0	0	1	0	0	1	3	0	0	0	0	0	6
Allochromatium vinosum	17	54	187	0	0	0	0	0	0	0	0	0	0	0	0	0	0	0	0	0	16	0	0	21	0	0	11	0	0	0	0	0	9	9	0	0	0	0	13	6	0	0	6	0	0	0	0	0	13
Alteromonas macleodii	0	0	30	0	0	0	0	0	0	0	0	0	0	0	0	0	0	1	0	0	0	0	0	2	0	1	4	0	0	0	0	0	2	0	0	0	0	0	0	0	0	0	9	0	0	0	0	0	0
Alteromonas sp.	0	0	20	5	0	0	0	0	0	0	0	0	0	0	0	0	0	0	0	0	3	0	0	2	1	1	2	0	0	0	0	0	2	0	1	0	0	0	0	0	0	4	271	0	0	0	0	0	0
Aminobacterium colombiense	0	0	39	0	0	0	0	0	0	0	0	0	0	0	0	0	0	0	0	0	20	0	0	0	0	0	0	0	0	0	0	0	5	0	0	0	0	0	0	0	0	0	0	0	0	0	0	0	0
Ammonifex degensii	3	0	0	7	0	0	0	0	6	0	0	0	0	0	0	0	0	0	0	0	13	0	0	0	0	0	0	0	0	0	0	0	6	0	0	0	0	0	0	0	0	0	0	0	0	0	0	0	0
Amycolatopsis mediterranei	26	84	242	18	11	0	0	0	13	0	0	0	0	0	0	0	0	0	0	0	0	0	0	5	0	9	24	0	0	0	0	0	0	0	3	0	0	0	1	0	0	0	0	0	0	0	0	0	31
Amycolicicoccus subflavus	23	74	255	21	7	0	0	0	7	0	0	0	0	0	0	3	0	0	0	0	4	0	0	11	5	8	20	0	0	0	0	0	7	0	7	5	0	0	6	0	0	7	0	0	0	0	0	0	46
Anabaena variabilis	1	7	21	0	0	0	0	0	0	0	0	0	0	0	0	0	0	0	0	0	0	0	1	0	2	8	1	0	0	0	0	0	3	0	0	0	0	0	0	0	0	0	0	0	0	1	0	0	0
Anaerococcus prevotii	52	83	410	61	1	0	8	0	6	5	0	2	0	0	0	2	0	0	0	0	43	3	3	31	0	12	27	0	0	11	0	27	38	0	23	0	0	0	5	2	0	5	0	0	0	3	0	0	8
Anaerolinea thermophila	4	11	37	7	0	0	0	0	0	0	0	0	0	0	0	0	0	0	0	0	9	0	0	4	0	2	6	0	0	0	0	0	2	0	0	0	0	0	0	0	0	0	0	0	0	1	0	0	2
Anaeromyxobacter dehalogenans	0	124	428	0	0	0	0	0	0	0	0	0	0	0	0	0	0	0	0	0	0	0	0	0	0	12	0	0	0	0	0	0	0	0	0	0	0	0	0	0	0	0	0	0	0	0	0	0	0
Anaeromyxobacter sp.	17	167	668	23	0	0	0	0	11	0	0	0	0	0	0	0	0	0	0	0	9	0	0	0	0	0	36	0	0	0	0	0	22	0	9	0	0	0	0	0	0	0	0	0	0	11	0	0	42
Anaplasma centrale	0	0	10	3	0	0	0	0	0	0	0	0	0	0	0	0	0	0	0	0	2	0	0	0	0	0	0	0	0	0	0	0	0	0	0	0	0	0	0	0	0	0	0	0	0	0	0	0	0
Anaplasma phagocytophilum	0	2	21	0	1	0	0	0	0	0	0	0	0	0	0	0	0	0	0	0	3	0	0	0	2	0	0	0	0	0	0	0	2	0	0	0	0	0	0	0	0	0	0	0	0	0	0	0	0
Anoxybacillus flavithermus	0	0	87	0	4	0	0	1	0	2	0	0	0	0	0	0	0	2	0	0	0	0	4	0	0	0	0	0	1	0	0	0	0	0	2	0	0	0	2	0	0	0	3	0	0	0	0	0	0
Aquifex aeolicus	0	10	39	7	0	0	0	0	0	0	0	0	0	0	0	0	0	0	0	0	4	0	0	0	0	0	2	0	0	0	0	0	4	0	0	0	0	0	0	0	0	0	0	0	0	0	0	0	0
Arcanobacterium haemolyticum	210	621	1974	113	66	8	10	5	69	9	3	2	0	7	0	24	18	57	0	0	0	0	0	161	41	48	254	11	0	0	0	0	33	0	17	16	0	0	20	12	0	8	0	0	0	53	0	0	359
Archaeoglobus fulgidus	0	4	23	6	0	0	0	0	0	0	0	0	0	0	0	0	0	0	0	0	0	0	0	0	0	0	5	0	0	0	0	0	2	0	0	0	0	0	0	0	0	0	0	0	0	0	0	0	0
Archaeoglobus profundus	0	0	37	0	0	0	0	0	0	0	0	0	0	0	0	0	0	0	0	0	4	0	0	0	0	0	4	0	0	0	0	0	2	0	0	0	0	0	0	0	0	0	0	0	0	0	0	0	0
Archaeoglobus veneficus	2	5	19	3	0	0	0	0	0	0	0	0	0	0	0	0	0	0	0	0	4	0	0	3	3	0	3	0	0	0	0	0	0	0	0	0	0	0	0	0	0	0	0	0	0	0	0	0	2
Arcobacter butzleri	9	11	76	20	0	0	0	0	0	5	0	0	0	0	0	0	0	0	0	0	29	0	4	5	1	7	17	0	0	1	0	0	7	0	1	0	0	0	0	0	0	0	19	0	0	0	0	0	5
Arcobacter nitrofigilis	6	13	123	23	0	0	2	1	1	1	0	1	0	0	0	2	0	1	0	0	22	0	3	6	2	9	17	0	0	3	0	1	8	0	6	6	0	0	0	0	0	1	8	0	0	0	0	0	3
Aromatoleum aromaticum	0	40	157	0	6	6	0	0	0	0	252	14	12	8	0	0	0	9	0	0	10	0	0	7	0	0	13	0	0	0	0	0	14	35	66	116	45	0	0	0	0	0	27	0	0	0	0	0	12
Arthrobacter arilaitensis	116	403	1251	99	50	6	4	0	32	0	0	2	0	5	0	13	0	9	0	2	8	4	0	44	10	24	137	3	0	4	0	0	27	0	5	9	1	0	8	5	0	2	0	2	0	17	0	0	124
Arthrobacter aurescens	118	325	1167	86	38	0	0	0	29	0	0	0	0	1	0	14	0	7	0	0	9	0	0	36	17	13	92	4	0	0	0	0	12	0	8	13	0	0	5	4	0	5	0	0	0	12	0	0	101
Arthrobacter chlorophenolicus	319	882	3160	166	92	0	8	7	43	0	0	0	0	7	0	59	0	17	0	0	3	5	8	85	28	49	341	6	0	7	0	0	23	0	40	23	0	0	15	8	0	9	0	0	0	20	0	0	248
Arthrobacter phenanthrenivorans	236	701	2323	158	82	0	0	0	39	0	0	0	0	0	0	31	0	28	0	0	6	0	0	79	10	32	292	4	0	7	0	0	22	0	31	13	0	0	11	6	0	0	0	0	0	17	0	0	223
Arthrobacter sp.	187	572	2125	87	47	0	0	6	39	6	0	0	0	3	0	25	0	11	0	0	6	0	0	59	14	56	193	0	0	0	0	0	21	0	23	25	0	0	11	0	0	2	0	0	0	19	0	0	196
Aster yellows	0	0	147	0	0	0	0	0	0	0	0	0	0	6	0	0	0	0	0	0	0	0	0	0	23	0	24	0	0	0	0	0	0	0	0	0	0	0	0	0	0	0	13	0	0	0	0	0	0
Asticcacaulis excentricus	0	6	63	4	0	0	0	0	0	0	0	0	0	0	0	0	0	0	0	0	6	0	0	0	0	4	11	0	0	0	0	0	0	0	0	0	0	0	0	0	0	0	0	0	0	0	0	0	5
Atopobium parvulum	14524	35280	75160	4813	4369	60	545	183	4586	844	58	44	10	108	24	12	0	3	0	9	56983	82	17	2333	4203	58	86	3	0	11	0	21	6027	20	24	10	0	10	3399	1606	44	1513	29	4	7	12	0	59	21726
Azoarcus sp.	22	76	303	0	11	6	0	0	0	0	0	0	0	0	0	0	0	16	0	0	0	0	0	22	4	13	24	21	24	15	0	0	7	0	24	0	0	0	0	0	0	0	0	0	0	4	0	0	15
Azorhizobium caulinodans	18	80	312	18	0	0	0	0	5	0	0	0	0	0	0	0	0	0	0	0	11	0	0	0	0	0	24	0	0	0	0	0	0	0	0	0	0	0	0	0	0	0	0	0	0	0	0	0	20
Azospirillum sp.	0	29	125	0	0	0	0	0	0	0	0	0	0	0	0	0	0	0	0	0	0	0	0	0	0	0	14	0	0	0	0	0	0	0	0	0	0	0	0	0	0	0	0	0	0	0	0	0	0
Azotobacter vinelandii	0	0	161	14	10	0	0	0	0	0	206	46	31	23	0	11	8	33	0	0	8	0	0	73	5	12	19	48	74	30	0	0	22	128	82	100	63	8	27	25	56	81	271	23	0	0	0	8	16
Bacillus amyloliquefaciens	3	7	50	7	0	0	0	0	2	0	0	0	0	0	0	2	0	1	0	0	15	0	1	3	8	3	9	0	0	0	0	2	8	0	3	0	0	0	0	0	0	0	5	0	0	2	2	0	4
Bacillus atrophaeus	0	9	58	7	0	0	2	0	2	0	0	0	0	0	0	0	0	0	0	1	11	0	0	3	3	4	21	0	0	0	0	0	6	0	4	1	0	0	0	0	0	0	5	0	0	0	0	0	0
Bacillus cellulosilyticus	9	17	62	13	0	0	1	0	2	1	0	0	0	1	0	1	0	1	0	1	16	0	2	8	3	3	21	1	0	7	0	1	13	0	6	0	0	0	1	0	0	6	4	0	0	3	0	0	4
Bacillus cereus	43	84	167	0	0	1	0	0	0	4	0	1	0	1	0	2	0	0	0	0	0	1	2	0	0	14	45	0	0	0	0	3	0	0	0	4	0	0	0	0	0	0	7	0	1	4	0	1	0
Bacillus clausii	5	9	43	10	1	2	1	1	4	2	0	1	0	0	2	2	2	7	0	0	12	2	15	14	2	21	17	1	1	3	0	3	7	1	4	0	0	0	1	2	0	3	0	1	0	6	2	0	4
Bacillus coagulans	11	19	90	20	3	0	0	0	5	1	0	0	0	0	0	2	0	5	0	0	23	1	2	5	6	6	37	1	5	2	0	3	12	0	4	0	0	0	1	0	0	0	11	0	0	6	0	0	23
Bacillus cytotoxicus	17	22	92	0	0	0	0	0	0	0	0	1	0	1	0	4	0	0	0	0	0	0	2	0	0	10	49	0	0	0	0	4	0	0	0	0	0	0	1	0	0	1	0	1	0	0	0	0	2
Bacillus halodurans	7	10	44	0	1	0	1	0	2	0	0	0	0	0	0	0	0	2	0	0	0	0	2	0	0	0	20	0	0	1	0	1	0	0	4	0	0	0	0	0	0	0	2	0	0	1	0	0	3
Bacillus licheniformis	1	1	2	1	0	0	0	0	0	0	0	0	0	0	0	0	0	0	0	0	1	0	0	0	0	2	4	0	0	0	0	0	0	0	1	0	0	0	0	0	0	0	1	0	0	0	0	0	0
Bacillus megaterium	0	16	71	0	0	0	0	0	0	0	0	0	0	0	0	3	0	0	0	0	0	0	0	0	0	10	43	0	0	0	0	3	0	0	0	0	0	0	0	0	0	0	0	0	0	0	0	0	0
Bacillus pseudofirmus	9	16	75	0	0	1	0	2	0	0	0	0	0	1	0	0	0	2	0	2	0	0	0	0	0	0	40	2	2	0	0	0	0	0	0	2	0	0	0	0	0	1	6	0	2	0	0	0	0
Bacillus pumilus	9	24	78	16	1	0	2	0	5	2	0	0	0	1	0	0	0	2	0	0	24	0	2	6	9	6	48	0	1	3	0	2	14	0	4	0	0	0	1	0	0	0	5	0	0	5	0	0	5
Bacillus selenitireducens	6	9	53	11	0	0	0	0	3	1	0	0	0	0	0	1	0	0	0	0	14	0	1	3	1	5	12	0	0	0	0	1	10	0	1	0	0	0	3	0	0	0	3	0	0	0	0	0	3
Bacillus subtilis	8	20	75	13	1	0	12	0	9	1	0	6	0	101	3	2	0	1	0	0	19	0	2	7	3	2	25	1	1	8	0	4	9	4	41	13	0	2	1	0	2	0	7	0	0	11	0	0	7
Bacillus thuringiensis	1	4	18	0	0	0	0	0	0	0	0	0	0	0	0	0	0	0	0	0	0	0	0	0	0	1	6	0	0	0	0	1	0	0	0	0	0	0	0	0	0	0	0	0	0	0	0	0	0
Bacillus weihenstephanensis	7	20	63	0	0	0	0	0	0	0	0	0	0	0	0	0	0	0	0	0	0	0	0	0	0	4	29	0	0	0	0	1	0	0	0	0	0	0	0	0	0	0	2	0	0	0	0	0	0
Bacteriovorax marinus	4	6	41	11	0	0	0	0	1	0	0	0	0	0	0	0	0	0	0	0	11	0	1	5	1	1	9	0	0	0	0	0	3	0	4	0	0	0	0	0	0	0	0	0	0	0	0	0	2
Bacteroides fragilis	96	80	551	85	5	0	3	1	9	16	0	2	0	4	1	0	0	0	0	1	29	6	42	65	8	6	14	0	0	3	0	4	77	0	10	0	0	0	2	0	0	4	4	0	0	0	0	1	25
Bacteroides helcogenes	52	56	377	78	2	0	3	1	4	6	0	2	0	1	0	0	0	1	0	1	47	2	25	62	21	2	7	0	0	1	0	1	77	0	3	0	0	0	2	0	0	9	8	0	0	0	0	2	11
Bacteroides salanitronis	137	140	824	60	5	0	4	0	8	18	1	6	0	7	2	0	0	1	0	2	69	3	56	125	24	4	8	0	0	4	0	4	115	0	11	0	0	0	4	0	0	4	3	0	0	0	0	1	14
Bacteroides thetaiotaomicron	47	62	340	45	2	0	1	1	1	4	0	1	0	1	0	0	0	2	0	1	69	2	21	42	11	2	8	0	0	2	0	2	52	0	3	0	0	0	2	0	1	1	1	0	0	0	0	0	8
Bacteroides vulgatus	44	54	340	52	3	0	1	0	4	5	0	1	0	2	0	0	0	4	0	1	58	2	24	50	21	3	9	0	0	5	0	1	67	0	4	0	0	0	2	0	0	3	9	0	0	0	1	0	9
Bartonella bacilliformis	0	0	87	0	0	0	0	0	0	0	0	0	0	0	0	0	0	0	0	0	0	0	0	0	0	0	0	0	0	0	0	0	8	0	0	0	0	0	0	0	0	0	0	0	0	0	0	0	0
Bartonella clarridgeiae	0	0	0	0	0	0	0	0	0	2	0	0	0	0	0	0	0	3	0	0	0	0	0	0	0	0	0	0	0	0	0	0	0	0	0	0	0	0	0	0	0	0	0	0	0	0	0	0	0
Bartonella grahamii	0	0	52	0	0	0	0	0	0	0	0	0	0	0	0	0	0	0	0	0	0	0	0	0	0	0	0	0	0	0	0	0	6	0	0	0	0	0	0	0	0	0	8	0	0	0	0	0	0
Bartonella henselae	0	0	45	0	0	0	0	0	0	0	0	0	0	0	0	0	0	0	0	0	0	0	0	0	0	0	0	0	0	0	0	0	2	0	0	0	0	0	0	0	0	0	0	0	0	0	0	0	0
Bartonella quintana	0	0	49	0	0	0	0	0	0	0	0	0	0	0	0	0	0	0	0	0	13	0	0	0	0	0	0	0	0	0	0	0	8	0	0	0	0	0	0	0	0	0	0	0	0	0	0	0	0
Bartonella tribocorum	0	0	54	0	0	0	0	0	0	0	0	0	0	0	0	0	0	0	0	0	0	0	0	0	0	0	0	0	0	0	0	0	0	0	0	0	0	0	0	0	0	0	0	0	0	0	0	0	0
Baumannia cicadellinicola	9	63	79	44	0	0	0	0	0	0	0	0	0	0	0	0	0	0	0	0	19	0	3	0	0	0	12	0	3	0	0	0	0	0	0	0	0	0	0	0	0	0	20	0	0	0	0	0	0
Bdellovibrio bacteriovorus	0	7	44	3	0	0	0	0	0	0	0	0	0	0	0	0	0	0	0	0	0	0	0	0	0	0	5	0	0	0	0	0	0	0	0	0	0	0	0	0	0	0	11	0	0	0	0	0	2
Beijerinckia indica	0	0	24	0	0	0	0	0	0	0	0	0	0	0	0	0	0	0	0	0	6	0	0	0	0	0	1	0	0	0	0	0	0	0	0	0	0	0	0	0	0	0	1	0	0	2	0	0	0
Beutenbergia cavernae	715	2155	7380	353	136	0	16	13	36	10	0	6	0	0	0	62	0	27	0	0	12	5	8	102	26	204	1001	0	0	18	0	0	94	0	80	91	0	0	22	19	0	9	0	11	0	57	0	0	850
Bifidobacterium adolescentis	131	412	1511	0	84	0	4	0	44	0	0	0	0	0	0	13	0	0	0	4	8	0	0	43	6	0	0	0	0	0	0	0	8	0	11	0	0	0	29	9	0	6	0	0	0	0	0	0	380
Bifidobacterium animalis	56	200	576	0	28	0	0	0	14	0	0	0	0	8	0	0	0	0	0	0	0	0	0	0	0	0	0	0	0	0	0	0	4	0	22	6	0	0	12	0	0	0	0	0	0	0	0	0	89
Bifidobacterium bifidum	0	0	0	0	0	5	0	0	0	0	0	0	0	0	0	14	0	0	0	0	27	0	0	48	20	0	0	0	0	0	0	0	0	0	11	0	0	0	0	5	0	0	0	0	0	0	0	0	0
Bifidobacterium dentium	94	310	950	0	62	0	0	0	0	0	0	0	0	3	4	4	0	0	0	3	6	2	0	28	4	0	0	0	0	0	0	0	42	6	0	0	0	0	15	5	0	0	0	0	0	0	0	2	21795
Bifidobacterium longum	194	613	2138	88	98	0	100	43	427	13	118	0	0	7	0	9	0	9	0	0	29	120	0	49	10	33	179	0	6	22	0	0	19	0	20	18	0	0	23	13	0	0	8	0	0	15	0	0	505
Blastococcus saxobsidens	160	493	1454	67	86	0	0	0	22	0	0	0	0	73	0	21	0	0	0	0	0	0	0	25	0	77	272	10	0	0	0	0	15	0	41	98	0	0	14	0	0	0	13	0	0	0	0	0	191
Blattabacterium sp.	0	0	509	78	0	0	10	0	10	5	0	0	0	0	0	0	0	0	0	0	0	0	8	21	3	18	92	0	0	0	0	0	0	0	23	23	0	0	0	0	0	0	0	0	0	0	0	0	10
Bordetella avium	0	15	76	0	0	0	0	0	5	0	0	0	0	0	0	9	0	0	0	0	6	0	0	0	5	0	28	5	0	0	0	0	15	0	24	0	0	0	0	0	0	0	0	0	5	6	0	0	10
Bordetella bronchiseptica	0	0	25	0	0	0	0	0	0	0	0	0	0	0	0	0	0	0	0	0	0	0	0	0	0	0	12	0	0	0	0	0	6	0	15	0	0	0	0	0	71	119	532	0	6	0	0	0	0
Bordetella parapertussis	0	0	16	0	0	0	0	0	0	0	0	0	0	0	0	0	0	0	0	0	0	0	0	0	0	0	0	0	0	0	0	0	0	0	4	0	0	0	0	0	0	0	0	0	0	0	0	0	0
Bordetella pertussis	0	0	0	0	0	0	0	0	0	0	0	0	0	0	0	0	0	0	0	0	0	0	0	0	0	0	25	0	0	0	0	0	0	0	12	0	0	0	0	0	0	0	149	0	0	0	0	0	0
Bordetella petrii	0	0	190	0	0	0	0	0	2	0	269	23	15	13	0	0	0	0	0	0	0	0	0	0	2	16	131	0	0	0	0	0	44	360	0	338	190	0	0	0	28	31	127	0	26	0	0	24	11
Borrelia bissettii	0	0	50	0	0	0	0	0	0	0	0	0	0	0	0	0	0	0	0	0	0	0	0	0	0	0	0	0	0	0	0	0	0	0	0	0	0	0	0	0	0	0	16	0	0	0	0	0	0
Borrelia burgdorferi	0	0	8	0	0	0	0	0	0	0	0	0	0	0	0	0	0	0	0	0	0	0	0	0	0	0	0	0	0	0	0	0	0	0	0	0	0	0	0	0	0	0	0	0	0	0	0	0	0
Borrelia duttonii	0	0	6	0	0	0	0	0	0	0	0	0	0	0	0	0	0	0	0	0	0	0	0	0	0	0	0	0	0	0	0	0	0	0	0	0	0	0	0	0	0	0	0	0	0	0	0	0	0
Borrelia garinii	0	0	25	0	0	0	0	0	0	0	0	0	0	0	0	0	0	0	0	0	0	0	3	0	0	0	0	0	0	0	0	0	0	0	0	0	0	0	0	0	0	0	0	0	0	0	0	0	3
Borrelia hermsii	0	0	85	0	0	0	0	0	0	0	0	0	0	0	0	0	0	0	0	0	0	0	0	4	0	0	0	0	0	0	0	0	0	0	0	0	0	0	0	0	0	0	0	0	0	0	0	0	0
Borrelia recurrentis	0	0	0	0	0	0	0	0	0	0	0	0	0	0	0	0	0	0	0	0	0	0	0	0	0	0	0	0	0	0	0	0	0	0	0	0	0	0	0	0	0	0	2	0	0	0	0	0	0
Borrelia turicatae	0	0	45	0	0	0	0	0	0	0	0	0	0	0	0	0	0	0	0	0	0	0	0	0	0	0	0	0	0	0	0	0	0	0	0	0	0	0	0	0	0	0	24	0	0	0	0	0	0
Brachybacterium faecium	985	2943	11064	560	289	0	32	19	139	30	0	14	0	23	0	135	19	48	0	0	18	0	0	274	38	258	1466	9	0	19	0	0	100	12	173	155	0	0	48	26	0	28	14	14	0	59	0	0	1267
Brachyspira hyodysenteriae	12	22	187	24	0	0	0	0	2	2	0	0	0	4	0	0	0	0	0	0	20	2	2	16	5	5	18	2	0	5	0	3	13	0	2	6	0	0	1	0	0	0	19	0	0	0	0	0	6
Brachyspira murdochii	8	21	196	31	0	0	5	0	6	2	0	1	0	1	0	0	0	0	0	0	23	1	3	17	7	11	13	1	0	2	0	1	14	0	6	2	3	2	1	0	0	1	24	0	0	1	0	0	6
Brachyspira pilosicoli	14	29	171	23	0	0	3	1	7	1	0	0	0	2	0	0	0	0	0	1	29	3	5	15	3	10	19	5	0	5	0	2	19	0	4	7	0	0	2	0	1	0	31	0	0	0	0	0	3
Bradyrhizobium japonicum	8	22	86	9	12	0	0	0	0	0	1	0	0	0	0	0	0	3	0	0	4	0	0	0	3	7	19	0	0	0	0	0	0	0	0	0	0	0	0	0	0	0	0	0	0	0	0	0	10
Bradyrhizobium sp.	0	97	352	18	9	0	0	0	0	0	0	0	0	1	0	7	2	4	0	0	25	0	0	0	0	7	50	0	0	0	0	5	0	0	0	0	0	0	0	0	0	0	14	0	0	0	0	0	20
Brevibacillus brevis	8	11	40	8	1	0	0	0	0	1	0	0	0	0	0	0	0	1	0	0	11	0	2	3	1	3	12	0	0	0	0	0	5	0	1	0	0	1	2	1	0	0	16	0	0	1	0	0	2
Brevundimonas subvibrioides	0	80	258	16	0	0	0	0	0	0	0	0	0	0	0	0	0	0	0	0	0	0	0	0	0	0	13	0	0	0	0	0	0	0	0	0	0	0	0	0	0	0	0	0	0	0	0	0	17
Brucella microti	0	0	0	0	0	0	0	0	0	0	0	0	0	0	0	0	0	0	0	0	0	0	0	0	0	0	0	0	0	0	0	0	0	18	7	10	9	0	0	0	0	0	0	0	0	0	0	0	0
Buchnera aphidicola	71	88	631	317	0	0	0	0	0	0	0	0	0	0	0	0	0	0	0	5	251	0	61	0	31	107	132	0	0	0	0	8	0	0	35	0	0	0	0	0	0	0	0	0	41	0	0	0	30
Burkholderia ambifaria	13	42	51	0	2892	1837	0	0	0	0	0	4	3	0	0	0	0	0	0	0	5	0	0	0	0	0	13	0	0	0	0	0	153	0	17	24	0	0	0	0	0	0	27	0	3	0	0	0	0
Burkholderia cenocepacia	6	20	75	0	4165	2725	0	0	0	0	0	0	0	0	0	0	0	0	0	0	5	0	0	0	0	0	18	0	0	0	0	0	7	0	14	0	0	0	0	0	0	0	3	0	0	0	0	7	9
Burkholderia gladioli	18	71	212	8	217	138	0	0	0	0	0	0	0	0	0	0	0	4	0	0	10	0	0	0	0	7	30	4	0	0	0	0	8	90	41	62	43	0	0	0	0	0	12	0	0	0	0	0	28
Burkholderia glumae	9	40	153	0	293	192	0	0	0	0	0	0	0	0	0	0	0	9	0	0	5	0	0	0	0	0	20	0	0	0	0	0	15	0	8	0	0	0	0	0	0	0	8	0	0	0	0	0	14
Burkholderia mallei	0	0	0	0	19	17	0	0	0	0	0	0	0	0	0	0	0	0	0	0	0	0	0	0	0	0	0	0	0	0	0	0	0	0	0	0	0	0	0	0	0	0	0	0	0	0	0	0	0
Burkholderia multivorans	283	16	6	0	140956	93468	0	0	0	0	0	41	19	21	0	15	0	0	0	0	58	0	0	0	0	1	0	0	0	0	0	9	29	36	63	67	35	0	0	0	17	41	80	0	0	0	0	0	0
Burkholderia phymatum	6	30	26	0	49	50	0	0	0	0	0	0	0	0	0	0	0	0	0	0	8	0	0	0	1	0	6	0	0	0	0	0	7	0	0	0	0	0	0	0	0	0	6	0	0	1	0	0	14
Burkholderia phytofirmans	0	17	52	0	43	35	0	0	0	0	0	0	0	0	0	0	2	4	0	0	3	0	0	0	0	0	4	0	0	0	0	0	6	0	3	0	0	0	0	0	0	0	2	0	0	0	0	0	5
Burkholderia pseudomallei	0	5	23	0	120	96	0	0	0	0	0	0	0	7	0	0	0	0	0	0	0	0	0	0	0	0	0	0	8	0	0	0	5	0	9	0	0	0	0	0	0	0	16	0	0	0	0	0	0
Burkholderia rhizoxinica	0	8	42	0	14	11	0	0	0	0	0	0	0	0	0	0	0	0	0	0	0	0	0	0	0	0	4	0	0	0	0	0	9	0	0	0	0	0	0	0	0	0	9	0	0	0	0	0	8
Burkholderia sp.	41	124	398	14	2092	1306	0	0	0	0	0	0	0	0	0	4	0	12	0	0	36	0	0	0	10	10	38	5	0	0	0	0	16	0	8	0	0	0	0	0	0	0	24	0	0	0	0	8	43
Burkholderia thailandensis	7	25	118	0	430	270	0	0	0	0	0	0	0	0	0	0	0	0	0	0	4	0	0	0	0	0	14	0	0	0	0	0	12	0	0	0	0	0	0	0	0	0	0	0	0	0	0	0	12
Burkholderia vietnamiensis	5	20	81	0	1543	1053	0	0	0	0	0	0	0	0	0	0	0	0	0	0	0	0	0	0	0	0	12	0	0	0	0	0	4	0	7	0	0	0	0	0	0	0	0	0	0	0	0	0	10
Burkholderia xenovorans	7	22	93	0	20	12	0	0	0	0	0	0	0	1	0	0	0	2	0	0	1	0	0	7	1	2	9	0	3	0	0	0	13	12	6	9	0	0	0	0	21	22	74	0	0	0	0	0	0
Butyrivibrio proteoclasticus	49	94	1214	106	3	0	0	0	1	4	0	0	0	0	0	0	0	0	0	1	84	0	4	22	5	10	12	0	0	7	0	2	51	0	0	0	0	0	3	0	0	3	1	0	0	0	0	1	4
Caldicellulosiruptor bescii	3	8	23	3	0	0	0	0	0	0	0	0	0	0	0	0	0	0	0	0	3	0	0	4	0	0	1	0	0	0	0	0	0	0	0	0	0	0	0	0	0	0	2	0	0	0	0	0	0
Caldicellulosiruptor hydrothermalis	3	8	27	6	0	0	0	0	0	0	0	0	0	0	0	0	0	0	0	0	5	0	0	1	0	0	2	0	0	0	0	0	0	0	0	0	0	0	0	0	0	0	0	0	0	0	0	0	0
Caldicellulosiruptor kristjanssonii	0	5	11	2	0	0	0	0	0	0	0	0	0	0	0	0	0	0	0	0	0	0	0	0	0	0	1	0	0	0	0	0	0	0	0	0	0	0	0	0	0	0	0	0	0	0	0	0	0
Caldicellulosiruptor kronotskyensis	2	2	31	6	0	0	0	0	0	0	0	0	0	0	0	0	0	0	0	0	3	0	0	0	0	0	1	0	0	0	0	0	0	0	0	0	0	0	0	0	0	0	1	0	0	0	0	0	0
Caldicellulosiruptor lactoaceticus	1	6	22	3	0	0	0	0	0	0	0	0	0	0	0	0	0	0	0	0	0	0	0	5	0	0	4	0	0	0	0	0	0	0	0	0	0	0	0	0	0	0	0	0	0	0	0	0	0
Caldicellulosiruptor obsidiansis	3	5	49	9	0	0	0	0	0	0	0	0	0	0	0	0	0	0	0	0	13	0	0	2	0	0	3	0	0	0	0	0	0	0	0	0	0	0	0	0	0	0	5	0	0	0	0	0	0
Caldicellulosiruptor owensensis	2	12	42	8	0	0	0	0	0	0	0	0	0	0	0	0	0	0	0	0	9	0	1	3	0	0	6	0	0	0	0	0	0	0	0	0	0	0	0	0	0	0	0	0	0	0	0	0	0
Caldicellulosiruptor saccharolyticus	5	12	71	12	0	0	0	0	0	0	0	0	0	0	0	0	0	0	0	0	14	0	2	3	0	0	3	0	0	0	0	0	7	0	0	0	0	0	0	0	0	0	6	0	0	0	0	0	0
Caldilinea aerophila	0	0	54	0	0	0	0	0	0	0	0	0	0	0	0	0	0	0	0	0	0	0	0	6	0	0	0	0	0	0	0	0	0	0	0	0	0	0	0	0	0	0	6	0	0	0	0	0	0
Caldisericum exile	6	16	71	10	0	0	0	0	1	0	0	0	0	0	0	0	0	0	0	0	8	0	0	3	0	3	5	0	0	0	0	0	11	0	3	0	0	0	0	0	0	0	0	0	0	0	0	0	2
Calditerrivibrio nitroreducens	6	11	70	16	0	0	0	0	0	0	0	0	0	0	0	0	0	0	0	0	36	0	0	6	2	0	5	0	0	0	0	0	6	0	2	0	0	0	0	0	0	0	0	0	0	0	0	0	1
Caldivirga maquilingensis	0	0	26	1	0	0	0	0	0	0	0	0	0	0	0	0	0	0	0	0	2	0	0	1	0	0	0	0	0	0	0	0	0	0	0	0	0	0	0	0	0	0	0	0	0	0	0	0	0
Campylobacter concisus	4	11	62	13	0	0	106	29	35	223	3	0	0	24	5	7	1	46	1	0	3090	16	2	200	0	750	212	0	0	6	0	0	250	1	7	0	0	0	92	23	5	50	20	0	2	32	0	0	1
Campylobacter curvus	2	5	59	10	0	0	0	2	0	6	0	0	0	0	0	0	0	0	0	0	22	0	0	6	0	3	6	0	0	0	0	0	21	0	0	0	0	0	0	0	0	0	0	0	0	0	0	0	0
Campylobacter fetus	2	23	130	6	0	0	0	0	12	12	0	0	0	0	0	0	0	0	0	0	11	0	0	11	0	2	5	0	0	18	0	0	10	0	0	0	0	0	0	0	0	0	32	0	0	0	0	0	1
Campylobacter hominis	20	33	120	30	0	0	7	0	9	3	0	0	0	0	0	0	0	0	0	0	25	0	2	18	0	12	98	0	0	4	0	0	41	0	6	2	0	0	0	0	0	0	15	0	0	0	0	0	1
Campylobacter jejuni	4	23	130	32	0	0	0	0	0	0	0	0	0	0	0	0	0	0	0	0	20	0	0	5	0	19	21	0	0	7	0	0	6	0	14	0	0	0	0	0	0	0	35	0	0	0	0	0	3
Campylobacter lari	11	23	98	12	0	0	0	0	9	3	0	0	0	0	0	0	0	0	0	0	15	0	3	13	0	1	8	0	1	0	0	0	20	0	3	0	0	0	0	0	0	0	8	0	0	0	0	0	3
Candidatus_Accumulibacter phosphatis	0	29	130	5	5	0	0	0	0	0	0	0	0	0	0	0	0	0	0	0	13	0	0	0	0	13	8	0	0	0	0	0	0	0	0	0	0	0	0	0	0	0	5	0	0	0	0	0	8
Candidatus_Amoebophilus asiaticus	0	13	68	11	0	0	1	0	1	0	0	0	0	0	0	0	0	0	0	0	0	0	7	0	0	2	0	0	0	0	0	0	5	0	1	0	0	0	0	0	0	0	13	0	0	0	0	0	3
Candidatus_Arthromitus sp.	17	33	239	46	0	0	3	1	0	4	0	0	0	0	0	0	2	2	0	0	41	2	0	20	4	13	50	0	0	5	0	3	22	0	11	0	0	0	3	0	0	0	20	0	0	0	0	0	4
Candidatus_Azobacteroides pseudotrichonymphae	32	36	256	42	2	0	0	0	3	7	0	0	0	3	0	0	0	4	0	0	0	0	8	31	11	3	10	0	0	4	0	4	21	0	2	0	0	0	0	0	0	0	0	0	0	0	0	0	7
Candidatus_Blochmannia floridanus	6	41	179	41	0	0	0	0	0	0	0	0	0	0	0	0	0	0	0	0	16	0	0	0	0	0	43	0	0	0	0	0	28	0	0	0	0	0	0	0	0	0	0	0	0	0	0	0	0
Candidatus_Blochmannia pennsylvanicus	0	28	85	39	0	0	0	0	0	0	0	0	0	0	0	0	0	0	0	0	20	0	0	0	4	0	8	0	0	0	0	0	0	0	5	0	0	0	0	0	0	0	0	0	0	0	0	0	0
Candidatus_Blochmannia vafer	0	15	86	7	0	0	0	0	0	0	0	0	0	0	0	0	0	0	0	0	29	0	0	7	0	0	17	0	0	0	0	0	0	0	0	0	0	0	0	0	0	0	0	0	0	0	0	0	0
Candidatus_Carsonella ruddii	0	0	244	0	0	0	0	0	0	0	0	0	0	0	0	0	0	0	0	0	0	0	0	31	0	0	0	0	0	0	0	0	0	0	0	0	0	0	0	0	0	0	113	0	0	0	0	0	0
Candidatus_Chloracidobacterium thermophilum	6	9	42	0	0	0	0	0	0	0	0	0	0	0	0	0	0	0	0	0	8	0	0	3	0	0	5	0	0	0	0	0	7	0	0	0	0	0	0	0	0	0	0	0	0	0	0	0	0
Candidatus_Cloacamonas acidaminovorans	0	9	77	0	0	0	5	0	0	0	0	0	0	0	0	0	0	0	0	0	13	0	1	0	0	2	5	0	0	0	0	0	0	0	0	0	0	0	0	0	0	0	0	0	0	0	0	0	1
Candidatus_Desulforudis audaxviator	0	4	106	0	0	0	0	0	0	0	0	0	0	0	0	0	0	0	0	0	0	0	0	3	0	0	13	0	0	0	0	0	0	0	0	0	0	0	0	0	0	0	0	0	0	0	0	0	0
Candidatus_Hamiltonella defensa	7	9	46	0	0	0	0	0	6	0	0	0	0	0	0	0	0	0	0	0	18	0	6	0	0	0	13	0	0	0	0	0	3	0	0	0	0	0	0	0	0	0	24	0	0	0	0	0	0
Candidatus_Hodgkinia cicadicola	0	0	0	0	0	0	0	0	0	0	0	0	0	28	0	0	0	0	0	0	0	0	0	0	0	0	0	0	0	0	0	0	0	0	0	0	0	0	0	0	0	0	63	0	0	0	0	0	0
Candidatus_Korarchaeum cryptofilum	0	3	11	4	0	0	0	0	0	0	0	0	0	0	0	0	0	0	0	0	0	0	0	0	4	0	0	0	0	0	0	0	0	0	0	0	0	0	0	0	0	0	0	0	0	0	0	0	0
Candidatus_Koribacter versatilis	0	3	47	0	0	0	0	0	0	0	0	0	0	0	0	0	0	0	0	0	0	0	0	0	0	2	5	0	0	0	0	0	0	0	0	0	0	0	0	0	0	0	0	0	0	0	0	0	7
Candidatus_Liberibacter asiaticus	0	20	78	17	0	0	0	0	0	0	0	0	0	0	0	0	0	0	0	0	0	0	0	0	0	0	0	0	0	0	0	0	0	0	0	0	0	0	0	0	0	0	0	0	0	0	0	0	0
Candidatus_Liberibacter solanacearum	0	0	45	0	0	0	0	0	0	0	0	0	0	0	0	0	0	0	0	0	5	0	0	0	0	0	0	0	0	0	0	0	18	0	0	0	0	0	0	0	0	0	35	0	0	0	0	0	0
Candidatus_Midichloria mitochondrii	0	6	52	6	0	0	0	0	0	0	0	0	0	0	0	0	0	0	0	0	8	0	0	0	0	0	0	0	0	0	0	0	0	0	0	0	0	0	0	0	0	0	0	0	0	0	0	0	0
Candidatus_Moranella endobia	0	0	80	0	0	0	0	0	0	0	0	0	0	0	0	0	0	0	0	0	11	0	0	0	0	0	6	0	0	0	0	0	0	0	0	0	0	0	0	0	0	0	11	0	0	0	0	0	0
Candidatus_Nitrospira defluvii	0	0	37	6	0	0	0	0	0	0	0	0	0	0	0	0	0	0	0	0	0	0	0	2	0	0	0	0	0	0	0	0	0	0	2	2	0	0	0	0	0	0	0	0	0	0	0	0	0
Candidatus_Pelagibacter sp.	4	16	104	17	0	0	0	0	0	0	0	0	0	0	0	0	0	0	0	0	11	0	0	2	0	12	10	0	0	8	0	0	8	0	0	16	0	0	0	0	0	0	36	0	0	26	0	0	10
Candidatus_Pelagibacter ubique	18	12	179	42	0	0	0	0	0	0	0	0	0	0	0	0	0	0	0	0	28	0	0	6	0	5	12	12	0	4	0	0	15	0	10	0	0	0	0	0	0	0	0	0	0	0	0	0	0
Candidatus_Phytoplasma australiense	5	30	122	24	0	0	0	0	0	0	0	0	0	0	0	0	0	0	0	0	10	0	0	2	0	5	41	0	0	3	0	0	15	0	0	0	0	0	0	0	0	0	0	0	0	0	0	0	0
Candidatus_Phytoplasma mali	10	12	231	56	0	0	0	0	0	0	0	0	0	0	0	0	0	0	0	0	15	0	0	28	0	8	30	0	0	0	0	0	20	0	5	0	0	0	0	0	0	0	0	0	0	0	0	0	0
Candidatus_Protochlamydia amoebophila	6	5	97	16	0	0	0	0	0	0	0	0	0	0	0	0	0	0	0	0	11	2	1	7	1	2	7	0	0	3	0	0	10	0	0	0	0	0	0	0	0	0	9	0	0	0	0	0	1
Candidatus_Puniceispirillum marinum	2	0	27	0	0	0	0	0	0	0	0	0	0	0	0	0	0	0	0	0	11	0	0	0	0	0	5	0	0	0	0	0	0	0	0	0	0	0	0	0	0	0	0	0	0	0	0	0	0
Candidatus_Rickettsia amblyommii	0	3	27	3	0	0	0	0	0	0	0	0	0	0	0	0	0	0	0	0	0	0	0	0	0	0	0	0	0	0	0	0	0	0	0	0	0	0	0	0	0	0	0	0	0	0	0	0	0
Candidatus_Riesia pediculicola	5	21	0	14	0	0	0	0	0	0	0	0	0	0	0	0	0	0	0	0	9	0	0	0	0	0	12	0	0	0	0	0	0	0	0	0	0	0	0	0	0	0	0	0	0	0	0	0	0
Candidatus_Ruthia magnifica	9	7	30	6	0	0	0	0	0	0	0	0	0	0	0	0	0	0	0	0	14	0	2	0	0	0	10	0	0	0	0	0	0	0	0	0	0	0	0	0	0	0	0	0	0	0	0	0	2
Candidatus_Solibacter usitatus	0	21	65	0	0	0	0	0	0	0	0	0	0	0	0	0	0	4	0	0	6	0	0	0	4	3	7	0	0	0	0	0	0	0	0	0	0	0	0	0	0	0	0	0	0	0	0	0	3
Candidatus_Sulcia muelleri	0	0	625	81	0	0	0	0	0	0	0	0	0	0	0	0	0	0	0	0	0	0	0	0	0	0	111	0	0	0	0	0	0	0	42	92	0	0	0	0	0	0	0	0	0	0	0	0	8
Candidatus_Vesicomyosocius okutanii	6	9	65	9	0	0	0	0	0	0	0	0	0	0	0	0	0	0	0	0	16	0	0	0	5	0	34	0	0	0	0	0	0	0	0	0	0	0	0	0	0	0	0	0	0	0	0	0	0
Candidatus_Zinderia insecticola	10	34	153	72	0	0	0	0	0	0	0	0	0	0	0	0	0	0	0	0	19	0	0	10	0	14	0	0	0	0	0	0	0	0	0	0	0	0	0	0	0	0	0	0	0	0	0	0	0
Capnocytophaga canimorsus	21	16	107	24	2	0	1	0	0	3	0	0	0	0	0	16	0	7	0	5	11	0	0	18	0	5	7	0	0	4	0	0	28	0	29	0	0	0	2	0	0	2	8	0	0	0	0	0	27
Capnocytophaga ochracea	74	90	332	110	143	1	2	8	11	24	2	1	1	4	1	1447	7	52	2	60	15	5	11	71	0	99	76	15	0	291	0	1	994	0	1123	0	9	0	56	23	10	25	36	1	3	2	2	1	455
Carboxydothermus hydrogenoformans	6	0	78	24	0	0	0	0	2	0	0	0	0	0	0	0	0	0	0	0	23	0	0	0	0	0	17	0	0	0	0	0	14	0	0	0	0	0	0	0	0	0	0	0	0	0	0	0	0
Carnobacterium sp.	43	83	265	28	5	0	8	5	22	15	1	2	0	3	1	3	0	19	0	1	88	3	6	38	34	45	325	5	4	12	0	4	84	0	17	2	0	0	5	2	0	6	9	2	0	47	0	0	6
Catenulispora acidiphila	122	436	1377	75	40	0	5	6	15	3	0	0	0	5	0	13	5	11	0	0	0	0	0	29	16	37	159	7	0	2	0	0	14	0	13	21	0	0	5	0	0	0	9	0	0	13	0	1	145
Caulobacter segnis	18	59	200	27	0	0	0	0	11	0	0	0	0	11	0	0	0	0	0	0	0	0	0	0	0	13	45	0	0	0	0	0	0	0	0	0	0	0	0	0	0	0	9	0	0	0	0	0	16
Caulobacter sp.	0	41	263	21	0	0	0	0	12	0	0	0	0	0	0	0	0	7	0	0	0	0	0	0	0	8	42	0	0	0	0	0	0	0	0	0	0	0	0	0	60	80	243	0	0	0	0	0	31
Cellulomonas fimi	869	2656	9735	451	161	0	5	13	64	14	0	11	0	22	0	74	0	40	0	0	0	0	5	124	31	214	886	0	0	17	0	0	38	0	62	100	0	0	32	12	0	11	12	0	0	79	0	0	908
Cellulomonas flavigena	777	2422	8784	403	160	0	18	12	83	19	0	11	0	15	0	66	0	0	0	0	0	0	0	140	33	276	1091	10	0	8	0	0	72	0	88	125	0	0	34	17	0	10	0	16	0	25	0	0	957
Cellulophaga algicola	4	11	70	10	1	0	0	0	0	1	0	0	0	0	0	3	0	0	0	0	8	0	4	7	2	0	9	0	0	2	0	0	6	0	5	0	1	0	0	0	0	1	7	0	0	0	0	0	4
Cellulophaga lytica	6	11	72	15	0	0	1	0	1	1	3	0	0	0	0	2	0	1	4	0	10	0	0	5	1	2	8	0	0	1	0	1	7	0	5	0	0	0	0	0	0	0	21	0	0	0	0	0	3
Cellvibrio gilvus	827	2672	9549	417	182	0	22	12	70	0	0	19	0	28	0	77	0	35	0	0	15	0	0	148	17	136	1135	0	0	17	0	0	107	0	96	119	0	0	42	18	0	0	0	0	0	45	0	0	1043
Cellvibrio japonicus	2	0	23	0	0	0	0	0	0	0	250	0	0	0	0	0	0	0	0	0	4	0	0	0	0	1	7	0	0	0	0	1	3	7	2	3	5	0	2	0	0	0	0	0	0	0	0	0	0
Cenarchaeum symbiosum	0	0	36	14	0	0	0	0	0	0	0	0	0	0	0	0	0	0	0	0	0	0	0	0	0	0	0	0	0	0	0	0	0	0	0	0	0	0	0	0	0	0	0	0	0	0	0	0	3
Chelativorans sp.	0	0	126	7	0	0	0	0	7	0	0	0	0	0	0	0	0	0	0	0	5	0	0	0	0	0	10	0	0	0	0	0	0	0	0	0	0	0	0	0	0	0	0	0	0	0	0	0	2
Chitinophaga pinensis	4	5	38	7	0	0	0	0	0	0	0	0	0	0	0	0	0	0	0	0	6	0	3	5	2	0	0	0	0	1	0	0	8	0	0	0	0	0	0	0	0	0	2	0	0	1	0	0	1
Chlamydia muridarum	0	28	43	13	0	0	0	0	0	0	0	0	0	0	0	0	0	0	0	0	3	0	0	0	0	0	15	0	0	0	0	0	0	0	0	0	0	0	0	0	0	0	0	0	0	3	0	0	0
Chlamydophila abortus	0	11	7	3	0	0	0	0	0	0	0	0	0	0	0	0	0	0	0	0	0	0	0	0	0	0	3	0	0	0	0	0	0	0	0	0	0	0	0	0	0	0	0	0	0	0	0	0	0
Chlamydophila caviae	0	4	23	9	0	0	0	0	0	0	0	0	0	0	0	0	0	0	0	0	4	0	0	2	0	0	0	0	0	0	0	0	0	0	0	0	0	0	0	0	0	0	0	0	0	0	0	0	0
Chlamydophila felis	0	0	13	6	0	0	0	0	0	0	0	0	0	0	0	0	0	0	0	0	2	0	0	0	0	0	4	0	0	0	0	0	0	0	0	0	0	0	0	0	0	0	0	0	0	0	0	0	0
Chlamydophila pecorum	3	13	28	6	0	0	0	0	0	0	0	0	0	0	0	0	0	0	0	0	0	0	0	0	0	0	5	0	0	0	0	0	0	0	0	0	0	0	0	0	0	0	0	0	0	0	0	0	0
Chlamydophila psittaci	2	3	62	0	0	0	0	0	0	0	0	0	0	0	0	0	0	0	0	0	0	0	0	0	0	0	0	0	0	0	0	0	0	0	0	0	0	0	0	0	0	0	0	0	0	0	0	0	0
Chlorobaculum parvum	0	0	0	0	0	0	0	0	0	0	0	0	0	0	0	0	0	0	0	0	0	0	0	0	0	0	0	0	0	0	0	0	0	0	0	0	0	0	0	0	0	0	0	0	0	0	0	0	11
Chlorobium chlorochromatii	0	0	65	7	0	0	0	0	1	0	0	0	0	0	0	0	0	0	0	0	0	0	1	12	0	0	3	0	0	0	0	0	0	0	0	0	0	0	0	0	0	0	0	0	0	0	0	0	2
Chlorobium limicola	0	0	47	0	0	0	0	0	0	0	0	0	0	0	0	0	0	0	0	0	0	0	0	0	0	0	4	0	0	0	0	0	0	0	0	0	0	0	0	0	0	0	0	0	0	0	0	0	3
Chlorobium luteolum	0	0	0	0	0	0	0	0	0	2	0	0	0	0	0	0	0	0	0	0	0	0	0	0	0	0	0	0	0	0	0	0	0	0	0	0	0	0	0	0	0	0	0	0	0	0	0	0	3
Chlorobium phaeobacteroides	0	0	57	0	0	0	0	0	0	0	0	0	0	1	0	0	0	0	0	0	0	0	0	0	0	0	2	0	0	0	0	0	0	0	0	0	0	0	0	0	0	0	0	0	0	0	0	0	0
Chlorobium phaeovibrioides	0	0	36	0	0	0	0	0	0	0	0	0	0	0	0	0	0	0	0	0	0	0	2	0	3	0	5	0	0	0	0	0	0	0	0	0	0	0	0	0	0	0	0	0	0	0	0	0	2
Chlorobium tepidum	0	0	0	0	0	0	0	0	0	0	0	0	0	0	0	0	0	0	0	0	0	0	2	0	0	0	11	0	0	0	0	0	0	0	0	0	0	0	0	0	0	0	0	0	0	0	0	0	0
Chloroflexus aggregans	2	5	28	4	0	0	0	0	0	0	0	0	0	0	0	0	0	0	0	0	7	0	0	1	0	0	2	0	0	0	0	0	3	0	0	0	0	0	0	0	0	0	0	0	0	0	0	0	1
Chloroherpeton thalassium	3	7	37	4	0	0	0	0	1	0	0	0	0	0	0	0	0	0	0	0	16	0	0	0	0	0	6	0	0	0	0	0	5	0	0	0	0	0	0	0	0	0	0	0	0	0	0	0	2
Chromobacterium violaceum	25	48	194	27	8	0	0	0	4	0	0	0	0	0	0	0	0	21	0	0	0	0	1	27	15	3	24	0	0	0	0	0	33	9	36	0	0	0	0	6	0	29	144	0	0	11	0	0	19
Chromohalobacter salexigens	0	0	167	0	0	0	0	0	2	0	0	0	0	0	0	10	0	0	0	0	9	0	0	5	0	5	26	0	0	0	0	0	14	6	6	9	0	0	2	0	0	0	4	0	0	0	0	5	9
Citrobacter koseri	0	0	25	0	0	0	0	0	1	0	0	0	0	0	0	0	0	0	0	0	4	0	1	1	0	0	3	0	0	0	0	0	6	0	0	0	0	0	0	0	0	0	3	0	0	0	1	0	0
Citrobacter rodentium	0	13	39	0	0	0	0	0	0	0	0	0	0	3	0	0	0	0	0	0	0	0	0	4	0	0	3	0	0	0	0	0	3	0	0	0	0	0	0	0	2	2	115	2	0	0	5	0	0
Clavibacter michiganensis	650	1982	7417	379	177	0	15	0	69	0	0	0	0	0	0	50	0	24	0	0	21	0	0	87	0	101	711	0	0	17	0	0	31	0	72	91	0	0	32	12	0	0	12	0	0	28	0	0	664
Clostridiales genomosp.	112	218	2665	380	9	0	7	2	13	23	0	3	0	3	0	0	0	2	0	5	643	7	7	146	29	40	114	8	0	12	0	67	153	2	109	2	2	0	23	7	0	9	0	0	0	3	0	6	67
Clostridium acetobutylicum	3	2	16	4	0	0	0	0	0	0	0	0	0	0	0	0	0	0	0	0	3	0	0	0	0	1	1	0	0	0	0	0	2	0	0	0	0	0	0	0	0	0	0	0	0	0	0	0	0
Clostridium beijerinckii	14	19	160	31	0	0	1	0	1	3	0	0	0	1	0	0	0	1	0	0	29	2	2	9	6	6	18	0	1	3	0	1	13	0	6	1	0	0	1	0	0	0	10	0	2	1	0	2	6
Clostridium botulinum	0	0	523	113	0	0	0	5	0	9	3	1	0	5	0	0	3	0	0	0	0	6	0	33	0	0	0	0	2	0	0	0	0	3	20	2	0	0	0	1	0	6	40	1	0	0	3	0	0
Clostridium cellulolyticum	54	84	234	37	1	0	1	0	5	1	0	0	0	0	1	0	0	0	0	0	29	0	3	5	1	3	7	1	0	1	0	0	19	0	1	1	0	0	0	0	0	0	7	0	0	0	0	0	3
Clostridium cellulovorans	8	15	105	22	0	0	2	2	3	2	1	1	0	2	0	4	0	1	0	4	0	3	2	7	0	7	29	0	0	3	0	2	17	0	6	0	0	1	1	2	1	1	29	0	0	1	0	0	3
Clostridium clariflavum	13	17	115	19	0	0	0	0	1	1	0	0	0	0	0	0	0	0	0	0	12	0	0	5	0	1	12	0	0	0	0	2	9	0	0	0	0	0	0	0	0	0	4	0	0	1	0	0	1
Clostridium difficile	55	70	412	105	4	0	6	1	13	9	0	1	0	3	0	4	1	4	0	3	56	6	5	63	6	31	290	1	1	4	0	6	65	2	65	0	3	0	8	2	0	2	10	1	3	3	0	1	18
Clostridium kluyveri	156	257	226	79	1	0	2	0	9	2	0	0	0	0	0	0	0	0	0	0	2	0	0	1	0	0	1	0	2	0	0	0	18	0	0	2	0	0	2	1	0	0	1	0	0	0	0	0	0
Clostridium lentocellum	23	39	212	37	2	0	4	1	3	2	0	0	0	1	0	0	0	1	0	0	40	2	2	15	6	7	41	1	1	4	0	3	20	0	4	0	0	3	1	1	0	4	9	0	0	1	0	1	3
Clostridium ljungdahlii	11	15	130	30	0	0	0	0	3	5	0	8	0	0	0	0	0	0	0	5	19	1	5	15	4	6	13	0	0	2	0	3	16	0	8	0	0	0	0	0	0	5	82	0	7	0	0	9	1
Clostridium novyi	0	0	179	0	0	0	0	0	0	0	0	1	0	3	0	0	0	0	0	0	0	0	0	17	0	0	0	0	0	0	0	0	0	0	9	0	0	0	2	0	0	3	3	0	0	0	0	0	0
Clostridium perfringens	17	24	133	31	1	0	2	2	2	2	0	0	0	0	0	3	0	0	0	0	27	4	2	18	10	8	24	1	0	6	0	0	15	0	6	1	0	0	1	0	0	0	12	0	0	0	0	0	7
Clostridium phytofermentans	23	36	415	58	0	0	0	0	2	5	0	1	0	1	2	0	0	1	0	0	43	0	3	12	4	6	21	0	0	3	0	2	31	0	4	1	0	0	1	1	0	0	0	0	0	2	0	1	0
Clostridium saccharolyticum	63	88	2893	105	2	0	1	0	5	7	0	0	0	2	0	1	0	1	0	1	119	1	2	24	4	19	8	3	0	6	0	2	70	0	0	0	0	0	4	1	0	3	3	0	0	0	0	3	4
Clostridium sp.	76	87	795	108	2	0	2	0	7	5	0	0	0	1	0	1	0	4	0	0	103	4	7	34	3	19	9	3	0	6	0	1	58	0	5	2	0	0	5	4	0	5	25	0	0	0	0	1	14
Clostridium sticklandii	17	28	208	31	0	0	9	0	2	0	3	0	0	0	0	0	0	1	0	1	26	1	0	20	2	5	36	0	0	2	0	4	15	0	5	0	0	0	2	1	0	1	6	0	0	0	0	0	2
Clostridium tetani	18	30	178	43	1	0	3	0	0	3	0	2	0	0	0	0	0	0	0	0	30	3	2	12	5	0	29	0	3	4	0	0	18	0	5	0	0	1	0	0	0	2	10	0	0	0	0	0	8
Clostridium thermocellum	0	18	193	20	0	0	0	0	0	0	0	0	0	1	0	0	0	0	0	0	0	0	3	0	0	0	0	0	0	0	0	0	0	0	0	0	0	0	2	0	0	0	5	0	0	0	0	0	2
Collimonas fungivorans	6	16	83	6	0	0	0	0	1	0	0	0	0	0	0	0	0	2	0	0	0	0	0	0	1	0	5	0	0	0	0	0	5	0	7	0	0	0	0	0	0	0	0	0	0	0	0	0	8
Colwellia psychrerythraea	0	5	37	9	0	1	0	0	3	1	0	0	0	0	0	0	0	0	0	0	7	1	1	3	2	1	6	2	1	0	0	0	2	0	4	0	0	0	0	0	0	0	24	0	0	1	0	0	0
Comamonas testosteroni	0	27	83	0	0	0	0	0	0	0	0	0	0	0	0	0	0	6	0	0	0	0	0	0	0	0	10	0	0	0	0	0	11	38	9	25	13	0	0	0	0	0	5	0	0	0	0	0	5
Conexibacter woesei	41	162	503	40	0	0	0	0	0	0	0	0	0	0	0	0	0	0	0	0	8	0	0	0	0	0	80	0	0	0	0	0	0	0	12	0	0	0	0	0	0	0	0	0	0	16	0	0	48
Coprothermobacter proteolyticus	0	4	31	6	0	0	0	0	0	0	0	0	0	0	0	0	0	0	0	0	4	0	0	0	0	0	3	0	0	0	0	0	3	0	0	0	0	0	0	0	0	0	0	0	0	0	0	0	0
Coraliomargarita akajimensis	2	5	30	4	0	0	0	0	0	0	0	0	0	0	0	0	0	0	0	0	8	0	0	6	1	0	1	0	0	0	0	0	3	0	0	0	0	0	0	0	0	0	0	0	0	2	0	0	0
Corallococcus coralloides	0	85	297	20	3	0	0	0	7	0	0	0	0	0	0	0	0	0	0	0	0	0	0	0	0	5	33	0	0	0	0	0	0	0	0	0	0	0	0	0	0	0	0	0	0	0	0	0	20
Coriobacterium glomerans	43	130	369	17	18	0	0	0	9	0	0	0	0	0	0	0	0	0	0	0	17	0	0	15	0	6	45	0	0	0	0	0	20	0	0	0	0	0	4	0	0	0	0	0	0	0	0	0	49
Corynebacterium aurimucosum	170	571	2092	126	62	0	0	8	23	0	0	0	0	6	0	16	0	0	0	0	6	0	0	50	11	105	129	0	0	5	0	0	13	0	42	11	0	0	14	2	0	5	9	0	0	19	0	0	192
Corynebacterium diphtheriae	32	70	247	13	13	0	0	0	31	0	0	0	0	1	0	3	0	0	0	0	3	2	0	15	8	118	38	0	0	0	0	0	7	0	27	2	0	0	8	3	0	3	6	0	0	7	0	0	57
Corynebacterium efficiens	148	533	1830	94	40	0	0	0	26	4	0	0	0	3	0	30	0	0	0	0	18	0	0	49	23	97	196	0	0	3	0	0	19	0	24	18	0	0	13	6	0	0	0	0	0	11	0	0	207
Corynebacterium glutamicum	5	22	93	5	6	0	0	0	12	0	0	0	0	0	0	0	0	0	0	0	3	0	0	6	2	10	15	0	0	0	0	0	1	0	3	0	0	0	0	0	0	0	0	0	0	3	0	0	14
Corynebacterium jeikeium	146	581	1783	102	46	0	0	6	45	5	0	0	0	0	0	15	0	0	0	0	9	0	0	58	15	81	231	0	0	0	0	0	20	0	17	0	0	0	37	8	0	9	0	3	0	26	0	0	168
Corynebacterium kroppenstedtii	51	218	517	30	111	12	2	7	14	0	11	0	0	0	0	9	0	0	0	0	15	4	10	22	15	10	112	8	2	4	0	9	9	5	0	3	0	5	5	4	0	8	39	4	0	10	0	0	89
Corynebacterium pseudotuberculosis	8	28	82	2	0	0	0	0	0	15	0	0	0	0	0	0	0	0	0	0	2	0	0	7	0	3	8	0	0	0	0	0	0	0	0	0	0	0	0	0	0	0	0	0	0	0	0	0	11
Corynebacterium resistens	58	184	686	33	12	0	2	0	11	5	0	0	0	0	0	0	3	3	0	0	5	2	0	19	12	23	30	0	0	0	0	0	6	0	6	0	0	0	0	3	0	0	0	0	0	0	0	0	55
Corynebacterium ulcerans	30	91	307	20	8	0	0	0	5	0	0	0	0	0	0	0	0	0	0	0	7	0	0	10	6	9	16	0	0	0	0	0	4	0	4	0	0	0	3	0	0	0	0	0	0	9	0	0	19
Corynebacterium urealyticum	343	765	3075	0	54	0	18	8	44	23	5	0	0	8	0	35	0	11	0	0	8	8	0	49	41	83	323	0	0	0	0	0	36	0	49	47	0	0	18	9	0	8	42	0	0	0	0	0	305
Corynebacterium variabile	382	1224	4901	264	137	0	13	13	63	12	0	13	0	0	0	83	0	35	0	0	45	0	10	153	19	274	884	11	0	0	0	0	91	6	99	76	0	0	37	10	0	11	12	0	0	33	0	0	751
Coxiella burnetii	0	0	3	0	0	0	0	0	0	0	0	0	0	0	0	0	0	0	0	0	0	0	0	0	0	0	0	0	0	0	0	0	0	0	0	0	0	0	0	0	0	0	0	0	0	0	0	0	0
Croceibacter atlanticus	9	18	84	21	0	0	1	0	2	2	0	0	0	3	0	2	0	1	0	0	17	0	0	9	3	3	6	0	0	3	0	0	6	0	8	0	0	0	0	0	0	1	0	0	0	0	0	0	8
Cronobacter sakazakii	0	0	54	0	3	0	0	0	0	0	0	0	0	0	0	0	0	0	0	0	0	0	0	0	0	2	1	0	0	0	0	0	7	0	0	0	0	0	0	0	0	0	14	0	0	0	0	0	0
Cronobacter turicensis	0	0	30	0	0	0	0	0	0	0	0	0	0	0	0	0	0	0	0	0	4	0	0	2	0	0	2	0	0	0	0	0	3	0	0	0	0	1	0	0	0	0	44	0	0	0	0	0	0
Cryptobacterium curtum	21	43	197	30	0	0	11	23	5	2	0	0	0	0	0	0	0	0	0	0	19	14	6	177	4	75	72	0	0	0	0	3	46	0	16	0	0	0	0	0	0	0	2	0	0	0	0	0	17
Cupriavidus metallidurans	10	29	101	12	0	0	0	0	0	0	55	128	60	47	0	0	0	0	0	0	3	0	0	0	3	6	17	0	0	0	0	0	0	139	136	189	108	0	0	0	1336	2071	7021	0	17	0	0	31	16
Cupriavidus necator	0	21	135	0	22	13	0	0	0	0	0	0	0	0	0	0	0	0	0	0	0	0	0	0	0	0	23	0	0	0	0	0	10	0	10	0	0	0	0	0	0	0	74	0	0	0	0	0	11
Cupriavidus taiwanensis	6	61	77	0	8	16	0	0	0	0	0	0	0	5	0	12	0	8	0	0	3	0	0	0	2	0	15	0	7	0	0	0	7	0	16	0	0	0	0	0	0	0	15	0	0	0	0	0	15
Cyanobacterium UCYN-A	0	0	65	0	0	0	0	0	0	2	0	0	0	0	0	3	0	0	0	0	0	0	0	26	0	1	15	0	0	0	0	0	0	0	3	0	0	0	0	0	0	0	10	0	0	0	0	0	0
Cyanothece sp.	0	30	112	15	0	0	0	0	0	4	0	0	0	0	0	1	0	2	1	1	24	8	4	12	11	0	23	12	1	5	0	0	8	0	5	4	0	0	1	3	0	0	24	0	5	3	0	6	1
Cyclobacterium marinum	5	7	50	8	0	0	0	0	0	0	0	0	0	0	0	0	0	0	0	0	16	0	0	7	1	1	2	0	0	0	0	0	8	0	0	0	0	0	0	0	0	0	2	0	0	0	0	0	1
Cytophaga hutchinsonii	4	10	57	11	0	0	0	0	2	4	0	0	0	1	0	1	0	1	0	0	9	0	3	0	2	3	7	0	0	0	0	0	0	0	0	0	0	0	0	0	0	0	9	0	0	0	0	0	6
Dechloromonas aromatica	0	32	65	0	0	0	0	0	1	0	0	0	0	0	0	0	0	0	0	0	8	0	2	0	3	0	8	0	0	0	0	0	11	0	0	0	0	0	0	0	0	0	4	0	0	0	0	0	3
Dechlorosoma suillum	29	51	276	14	5	5	0	0	0	0	49	0	0	0	0	0	0	15	0	0	7	0	0	0	0	0	40	0	0	0	0	0	103	0	25	0	0	0	0	0	0	0	36	0	3	0	0	0	23
Deferribacter desulfuricans	5	21	114	24	0	0	0	0	3	0	0	0	0	0	0	0	0	0	0	0	22	0	0	0	3	16	12	0	0	0	0	1	0	0	0	0	0	0	0	0	0	0	9	0	0	0	0	0	4
Dehalococcoides ethenogenes	7	5	39	5	0	0	0	0	0	0	0	0	0	0	0	0	0	0	0	0	8	0	0	0	0	0	2	0	0	0	0	0	3	0	0	0	0	0	0	0	0	0	0	0	0	0	0	0	0
Dehalococcoides sp.	3	5	39	8	0	0	0	0	0	0	0	0	0	0	0	0	0	0	0	0	7	0	0	4	0	0	3	0	0	0	0	0	2	0	0	0	0	0	0	0	0	0	0	0	0	0	0	0	0
Dehalogenimonas lykanthroporepellens	5	12	67	12	0	0	0	0	0	0	0	0	0	0	0	0	0	0	0	0	9	0	0	0	0	0	0	0	0	0	0	0	0	0	0	0	0	0	0	0	0	0	0	0	0	4	0	0	0
Deinococcus deserti	0	49	0	5	0	0	0	0	0	0	0	0	0	0	0	0	0	0	0	0	6	0	0	0	0	0	0	0	0	0	0	0	16	0	0	0	0	0	0	0	0	0	0	0	0	0	0	0	0
Deinococcus geothermalis	0	0	0	0	0	0	0	0	0	0	0	0	0	0	0	0	0	0	0	0	0	0	0	0	0	0	0	0	0	0	0	0	0	0	0	0	0	0	0	0	0	0	20	0	0	0	0	0	0
Deinococcus maricopensis	20	113	450	20	0	0	0	0	0	0	0	0	0	0	0	0	0	0	0	0	20	0	0	0	0	0	34	0	0	0	0	0	27	0	0	0	0	0	0	0	0	0	0	0	0	0	0	0	0
Deinococcus proteolyticus	72	185	612	20	0	0	0	0	0	0	0	0	0	0	0	0	0	0	0	0	20	0	0	20	0	0	50	0	0	0	0	0	0	0	0	0	0	0	0	0	0	0	0	0	0	0	0	0	0
Deinococcus radiodurans	0	58	229	0	0	0	0	0	0	0	0	0	0	0	0	0	0	0	0	0	0	0	0	0	0	0	0	0	0	0	0	0	0	0	0	0	0	0	0	0	0	0	0	0	0	0	0	0	0
Delftia acidovorans	0	9	57	0	5	0	0	0	8	0	40	24	12	10	0	0	0	7	0	0	0	0	0	0	0	4	13	0	1	0	0	0	13	1089	296	704	568	0	18	0	0	0	13	0	5	5	0	8	8
Delftia sp.	0	7	40	0	0	0	0	0	0	0	0	0	0	0	0	0	0	4	0	0	0	0	0	0	0	0	15	1	3	0	0	0	8	0	7	9	0	0	0	0	0	0	0	0	0	0	0	0	5
Denitrovibrio acetiphilus	0	0	54	0	0	0	0	0	0	0	0	0	0	0	0	0	0	0	0	0	0	0	0	0	0	0	0	0	0	0	0	0	4	0	0	0	0	0	0	0	0	0	0	0	0	0	0	0	0
Desulfarculus baarsii	0	0	228	17	0	0	0	0	0	0	0	0	0	0	0	0	0	0	0	0	0	0	0	16	4	0	0	0	0	0	0	0	0	0	7	0	0	0	0	0	0	0	0	0	0	0	0	0	13
Desulfatibacillum alkenivorans	2	7	36	6	0	0	0	0	0	0	0	0	0	0	0	0	0	0	0	0	8	0	1	0	1	2	0	0	0	0	0	0	0	0	0	0	0	0	0	0	0	0	0	0	0	0	0	0	1
Desulfitobacterium hafniense	5	11	41	7	0	0	0	0	2	1	0	0	0	0	0	0	0	0	0	0	20	0	1	3	1	1	7	0	0	1	0	1	4	0	3	0	0	0	1	0	0	0	3	0	0	0	0	0	1
Desulfobacca acetoxidans	0	0	0	3	0	0	0	0	0	0	0	0	0	0	0	0	0	0	0	0	4	0	0	0	0	0	0	0	0	0	0	0	0	0	0	0	0	0	0	0	0	0	0	0	0	0	0	0	2
Desulfobacterium autotrophicum	0	0	28	0	0	0	0	0	0	0	0	0	0	0	0	0	0	0	0	0	10	0	1	3	0	4	2	0	0	0	0	0	8	0	0	0	0	0	0	0	0	0	2	0	0	0	0	0	0
Desulfobulbus propionicus	3	0	60	12	0	0	0	0	0	0	0	0	0	0	0	0	0	0	0	0	13	0	0	0	0	0	0	0	0	0	0	0	0	0	0	0	0	0	0	0	0	0	0	0	0	3	0	0	3
Desulfococcus oleovorans	3	0	25	3	0	0	0	0	0	0	0	0	0	0	0	0	0	0	0	0	5	0	0	0	0	0	14	0	0	0	0	0	0	0	0	0	0	0	0	0	0	0	0	0	0	0	0	0	2
Desulfohalobium retbaense	4	12	39	0	0	0	0	0	3	0	0	0	0	0	0	0	0	0	0	0	6	0	0	0	0	0	0	0	0	0	0	0	4	0	0	0	0	0	0	0	0	0	0	0	0	0	0	0	2
Desulfomicrobium baculatum	0	0	0	0	0	0	0	0	0	0	0	0	0	2	0	0	0	6	0	0	0	0	0	0	0	0	0	0	0	0	0	0	0	0	0	0	0	0	0	0	0	0	0	0	0	0	0	0	0
Desulfosporosinus orientis	11	18	69	10	0	0	1	0	2	1	0	0	0	0	0	1	0	4	0	0	25	0	1	4	3	1	6	0	1	1	0	0	6	0	1	0	0	0	1	0	0	0	3	0	0	0	0	0	1
Desulfotalea psychrophila	0	0	54	0	0	0	0	0	0	0	0	0	0	0	0	0	0	0	0	0	11	0	0	5	1	1	3	0	0	0	0	0	4	0	0	0	0	0	0	0	0	0	3	0	0	1	0	0	3
Desulfotomaculum acetoxidans	9	18	137	16	0	0	0	0	2	0	0	0	0	0	0	0	0	0	0	0	16	11	0	9	1	4	11	0	0	1	0	1	7	0	2	0	0	0	1	0	0	0	2	0	0	0	0	0	2
Desulfotomaculum carboxydivorans	9	12	68	20	1	0	0	0	2	0	0	0	0	0	0	0	0	0	0	0	22	0	0	6	0	4	3	0	0	0	0	0	6	0	5	0	0	0	1	0	0	1	7	0	0	0	0	0	0
Desulfotomaculum kuznetsovii	9	7	43	12	0	0	0	0	0	0	0	0	0	0	0	0	0	0	0	0	15	0	0	0	0	0	7	0	0	0	0	0	5	0	0	0	0	0	0	0	0	0	0	0	0	0	0	0	0
Desulfotomaculum reducens	9	14	63	20	0	0	0	0	1	0	0	0	0	0	0	0	0	0	0	0	23	0	0	4	0	1	12	0	0	1	0	1	8	1	1	0	0	0	0	0	0	0	0	0	0	0	0	0	1
Desulfotomaculum ruminis	7	9	54	12	0	0	1	0	4	2	0	0	0	0	0	0	0	0	0	0	31	0	1	6	1	3	5	0	0	0	0	0	4	0	1	0	0	0	0	0	0	0	2	0	0	3	0	0	2
Desulfovibrio aespoeensis	0	36	153	0	0	0	0	0	0	0	0	0	0	0	0	0	0	0	0	0	20	0	4	0	0	8	16	0	0	0	0	0	0	0	0	0	0	0	0	0	0	0	10	0	0	0	0	0	9
Desulfovibrio africanus	13	38	142	6	0	0	0	0	6	0	0	0	0	0	0	0	0	0	0	0	6	0	6	4	0	0	23	0	0	0	0	0	0	0	2	0	0	0	0	0	0	0	7	0	0	0	0	0	12
Desulfovibrio alaskensis	6	0	73	0	0	0	0	0	5	0	0	0	0	0	0	0	0	0	0	0	6	0	0	0	0	2	2	0	0	0	0	0	11	0	3	0	0	0	0	0	0	0	0	0	0	0	0	0	3
Desulfovibrio desulfuricans	23	90	390	26	0	0	0	0	0	0	0	0	0	0	0	0	0	0	0	0	5	0	0	0	0	0	25	0	0	0	0	0	10	0	0	0	0	0	0	0	0	0	23	0	0	0	0	0	45
Desulfovibrio magneticus	4	75	254	0	0	0	0	0	2	0	0	0	0	0	0	6	0	0	0	0	11	0	0	0	0	9	14	0	0	0	0	0	5	0	0	0	0	0	0	0	0	0	6	0	0	0	0	0	8
Desulfovibrio salexigens	6	9	47	7	0	0	0	0	0	2	0	0	0	0	0	0	0	0	0	0	10	0	0	2	0	0	2	0	0	0	0	0	3	0	0	0	0	0	0	0	0	0	2	0	1	0	0	0	0
Desulfovibrio vulgaris	0	64	366	0	0	0	0	0	0	0	252	0	0	0	0	0	0	7	0	0	27	0	0	4	5	7	28	0	0	0	0	0	28	0	0	0	0	0	0	0	0	0	7	0	0	0	0	0	43
Desulfurispirillum indicum	7	16	43	0	0	0	0	0	0	0	0	0	0	0	0	0	0	2	0	0	7	0	0	0	0	0	4	65	92	47	0	0	0	0	4	0	0	0	0	0	0	0	0	0	0	0	0	0	4
Desulfurivibrio alkaliphilus	0	0	55	22	0	0	0	0	8	0	0	0	0	0	0	0	0	0	0	0	4	0	0	0	5	0	11	0	0	0	0	0	0	0	0	0	0	0	0	0	0	0	0	0	0	0	0	0	6
Desulfurobacterium thermolithotrophum	9	6	65	20	0	0	5	0	0	2	0	0	0	0	0	0	0	1	0	0	19	0	2	8	0	3	10	0	0	3	0	0	7	0	5	0	0	0	0	0	0	0	3	0	0	0	0	0	0
Desulfurococcus kamchatkensis	0	0	43	0	0	0	0	0	0	0	0	0	0	0	0	0	0	0	0	0	10	0	0	0	0	0	0	0	0	0	0	0	4	0	0	0	0	0	0	0	0	0	12	0	0	0	0	0	0
Desulfurococcus mucosus	0	0	5	0	0	0	0	0	0	0	0	0	0	0	0	0	0	0	0	0	0	0	0	0	0	0	0	0	0	0	0	0	0	0	0	0	0	0	0	0	0	0	0	0	0	0	0	0	0
Dichelobacter nodosus	0	0	68	14	0	0	0	0	0	0	0	0	0	0	0	0	0	4	0	0	29	0	0	0	0	4	5	0	0	0	0	0	0	0	0	0	0	0	0	0	0	0	0	0	0	0	0	0	2
Dickeya dadantii	0	0	100	0	0	0	0	0	1	0	0	0	0	0	0	0	0	4	0	0	9	0	1	0	1	0	6	0	7	0	0	0	0	0	6	0	0	0	0	0	0	0	75	0	0	0	1	0	0
Dickeya zeae	0	0	33	0	0	0	0	0	0	0	0	0	0	0	0	0	0	5	0	0	3	0	0	2	0	0	0	0	0	0	0	0	3	0	0	0	0	0	0	0	0	0	40	0	0	0	0	0	0
Dictyoglomus thermophilum	4	8	62	11	0	0	0	0	0	0	0	0	0	0	0	0	0	0	0	0	15	2	0	3	0	2	12	0	0	6	0	1	5	0	0	0	0	0	0	0	0	0	1	0	0	0	0	0	3
Dictyoglomus turgidum	6	15	96	14	0	0	0	0	0	0	0	0	0	0	0	0	0	0	0	0	16	0	2	3	0	2	12	0	0	0	0	0	8	0	2	0	0	0	0	0	0	0	3	0	0	0	0	0	0
Dinoroseobacter shibae	0	49	187	0	0	0	0	0	0	0	0	0	0	0	0	0	0	0	0	0	0	0	0	0	0	0	13	0	0	0	0	0	0	0	0	0	0	0	0	0	0	0	17	0	0	0	0	0	28
Dyadobacter fermentans	0	5	31	0	0	0	0	0	0	1	0	1	0	2	0	0	0	1	0	0	4	0	0	0	0	0	3	0	0	0	0	0	8	0	0	0	0	0	0	0	0	0	0	0	0	0	0	0	2
Edwardsiella ictaluri	0	0	0	0	0	0	0	0	0	0	0	0	0	0	0	0	0	0	0	0	0	0	0	0	0	0	0	0	0	0	0	0	0	0	0	0	0	0	0	0	0	0	66	0	0	0	0	0	0
Edwardsiella tarda	0	14	0	0	0	0	0	0	0	0	0	0	0	2	0	0	0	0	0	0	0	0	0	0	0	0	0	0	0	0	0	0	0	0	0	0	0	0	0	0	0	0	11	0	0	0	0	0	0
Eggerthella lenta	80	212	922	40	0	0	2	0	23	8	0	0	0	9	0	0	0	7	0	0	25	0	0	19	9	33	105	0	0	0	0	0	0	0	11	0	0	0	0	0	0	0	0	0	0	9	0	0	85
Eggerthella sp.	47	208	554	36	0	0	0	0	0	1	0	0	0	0	0	0	0	0	0	0	23	0	0	8	0	0	10	0	0	1	0	0	8	0	0	0	0	0	0	0	0	0	0	0	0	0	0	0	15
Ehrlichia canis	4	8	105	7	0	0	0	0	0	0	0	0	0	0	0	0	0	0	0	0	17	0	0	11	2	2	7	0	0	0	0	0	4	0	0	0	0	0	0	0	0	0	11	0	0	0	0	0	0
Ehrlichia chaffeensis	2	8	37	12	0	0	0	0	0	0	0	0	0	0	0	3	0	0	0	0	17	0	0	0	0	3	6	0	0	0	0	0	4	0	0	0	3	0	0	0	0	0	0	0	0	0	0	0	0
Ehrlichia ruminantium	0	2	12	0	0	0	0	0	0	0	0	0	0	0	0	0	0	0	0	0	3	0	0	0	0	0	1	0	0	0	0	0	0	0	0	0	0	0	0	0	0	0	11	0	0	0	0	0	0
Elusimicrobium minutum	8	7	89	15	0	0	0	0	0	0	0	0	0	0	0	0	0	0	0	0	9	0	0	15	8	0	2	0	0	0	0	0	10	0	0	0	0	0	0	0	0	0	38	0	0	0	0	0	0
Enterobacter aerogenes	0	0	25	0	0	0	0	0	0	0	0	0	0	0	0	0	0	0	0	0	0	0	0	1	0	0	3	2	0	1	0	1	12	0	0	1	0	1	2	1	0	1	8	0	0	0	0	0	3
Enterobacter asburiae	0	0	20	0	0	0	0	0	0	0	0	0	0	0	0	0	0	0	0	0	8	0	0	0	1	0	1	0	0	0	0	0	0	0	0	0	0	0	0	0	0	0	2	0	0	0	0	0	1
Enterobacter cloacae	0	0	81	0	0	0	0	0	7	0	23	0	0	1	0	0	1	5	0	0	8	0	5	0	3	3	13	0	0	0	0	0	0	0	3	0	0	2	5	0	0	0	48	0	0	0	2	0	3
Enterobacter sp.	0	0	30	0	0	0	0	0	2	0	0	0	0	0	0	0	0	0	0	0	5	0	0	0	1	2	3	0	0	0	0	0	0	0	0	0	0	0	0	0	0	0	18	0	0	0	0	0	0
Enterococcus faecalis	38	92	240	27	11	12	7	8	22	16	0	2	0	2	1	5	0	20	0	997	149	2	17	39	47	64	358	6	6	15	0	2928	89	0	19	2	0	0	4	2	0	3	7	2	2	43	0	0	57
Enterococcus faecium	30	70	196	27	7	0	6	4	19	16	0	2	0	2	1	2	1	12	0	15	78	2	19	31	24	26	232	4	4	11	0	47	61	0	15	3	0	0	4	0	0	3	4	0	0	27	0	0	12
Erwinia billingiae	0	0	27	0	0	0	0	0	0	0	0	0	0	0	0	0	0	2	0	0	4	0	0	3	1	0	2	0	0	0	0	0	5	0	0	0	0	14	4	10	6	2	305	0	0	4	1	0	4
Erwinia pyrifoliae	0	0	13	0	0	0	0	0	2	0	0	0	0	0	0	0	0	0	0	0	9	0	0	2	0	0	0	0	0	0	0	0	4	3	3	2	1	0	0	0	0	0	9	0	0	0	0	0	0
Erwinia tasmaniensis	0	10	28	0	0	0	0	0	0	0	0	0	0	0	0	0	0	3	0	0	4	0	0	6	0	0	4	0	0	0	0	0	4	0	3	0	0	0	1	0	0	0	2	0	0	0	0	0	0
Erysipelothrix rhusiopathiae	40	60	268	122	1	0	2	3	5	4	0	0	0	0	0	2	0	3	0	0	45	1	4	27	7	17	75	2	1	5	0	16	28	0	6	2	0	0	4	3	0	3	4	0	0	6	0	0	15
Erythrobacter litoralis	10	36	125	0	0	0	0	0	0	0	0	0	0	0	0	0	0	0	0	0	4	0	0	4	0	0	6	0	0	0	0	0	0	0	0	0	0	0	0	0	0	0	0	0	0	0	0	0	14
Escherichia coli	1	10	53	0	6	0	2	0	4	0	0	0	0	58	3	1	2	1	2	0	0	3	3	5	3	4	5	0	2	1	0	1	6	8	25	12	3	18	19	16	47	42	2105	1	1	5	3809	1	10
Escherichia fergusonii	0	3	17	2	0	0	0	0	0	0	0	0	0	0	0	0	0	0	0	0	3	0	0	2	1	1	0	0	0	0	0	0	0	0	0	0	0	0	0	0	0	0	8	0	0	0	51	0	0
Ethanoligenens harbinense	15	32	151	16	0	0	0	0	2	2	0	0	0	0	0	0	0	0	0	0	26	0	0	5	0	5	7	0	0	0	0	0	12	0	0	0	0	0	0	0	0	1	0	0	0	0	0	0	8
Eubacterium eligens	97	156	2874	199	5	0	2	1	5	11	0	2	0	2	0	0	0	0	0	1	109	0	6	32	4	18	21	2	0	12	0	2	99	0	4	0	0	0	6	0	0	8	6	0	0	0	0	2	6
Eubacterium limosum	10	19	126	21	1	0	5	0	3	1	0	0	0	0	0	1	0	1	0	0	26	4	0	4	4	4	21	0	0	3	0	0	21	0	2	3	0	0	1	1	0	0	0	0	0	1	0	0	3
Eubacterium rectale	54	124	2154	175	2	0	5	1	3	8	0	1	0	2	0	1	0	3	0	0	129	3	4	40	6	10	26	4	1	11	0	2	100	1	4	1	0	0	5	1	1	5	12	0	0	0	0	1	7
Exiguobacterium sibiricum	0	14	71	0	0	0	1	0	0	0	0	0	0	1	0	0	0	0	0	0	0	0	1	0	0	0	0	0	0	0	0	0	0	0	1	0	0	0	1	0	0	0	0	0	0	0	0	0	6
Exiguobacterium sp.	8	17	64	13	1	0	0	0	4	3	0	0	0	0	0	2	0	2	0	0	23	0	3	7	0	3	37	0	0	0	0	0	22	0	0	0	0	0	0	0	0	1	2	0	0	3	0	0	7
Ferrimonas balearica	0	0	85	0	0	0	0	0	0	0	0	0	0	0	0	0	0	6	0	0	2	0	0	4	0	0	15	0	0	0	0	0	9	0	4	0	0	0	0	0	0	0	0	0	0	0	0	0	0
Ferroglobus placidus	0	5	25	4	0	0	0	0	0	0	0	0	0	0	0	0	0	0	0	0	2	0	0	0	0	0	7	0	0	0	0	0	0	0	0	0	0	0	0	0	0	0	1	0	0	0	0	0	0
Fervidobacterium nodosum	5	8	44	10	0	0	0	0	1	0	0	0	0	0	0	0	0	0	0	0	10	0	0	4	2	2	6	0	0	0	0	0	7	0	0	0	0	0	0	0	0	0	0	0	0	0	0	0	6
Fervidobacterium pennivorans	4	6	55	13	0	0	0	0	1	0	0	0	0	0	0	0	0	0	0	0	5	0	2	0	1	0	4	0	0	0	0	0	5	0	6	0	0	0	0	0	0	0	0	0	0	0	0	0	0
Fibrobacter succinogenes	9	15	69	8	1	0	3	0	0	0	0	1	0	0	0	0	0	1	0	0	11	0	0	7	2	2	11	0	0	0	0	0	6	0	0	0	0	0	0	0	0	0	0	0	0	0	0	0	2
Filifactor alocis	73	167	11672	103	11	0	31	7	76	27	0	8	0	0	0	0	0	15	2	0	142	30	36	243	12	28	143	21	7	23	0	8	190	0	45	21	0	2	12	7	2	5	3	0	0	0	0	0	23
Finegoldia magna	61	55	1154	91	2	0	0	2	11	8	0	1	0	0	0	2	0	7	0	2	125	8	8	42	0	34	66	31	4	22	0	46	107	0	86	18	0	3	42	26	0	3	3	0	0	0	0	0	4
Flavobacteriaceae bacterium	5	12	59	16	0	0	0	0	0	0	0	0	0	0	0	0	0	2	0	1	14	0	0	0	0	1	0	0	0	1	0	0	7	0	3	0	0	0	0	0	0	0	0	0	0	0	0	0	14
Flavobacterium branchiophilum	10	13	115	28	0	0	0	0	0	0	0	1	0	0	0	3	0	1	0	0	22	0	0	11	0	0	0	0	0	4	0	0	10	0	7	0	0	0	0	0	0	0	13	0	0	0	0	0	15
Flavobacterium columnare	15	22	136	16	0	0	0	0	0	1	0	0	0	4	0	3	0	2	0	0	21	1	3	9	1	9	13	0	0	2	0	0	9	0	8	0	0	0	0	0	0	0	11	0	0	1	0	0	9
Flavobacterium indicum	7	18	89	20	0	0	2	0	0	2	0	0	0	0	0	3	0	1	0	0	17	0	0	7	3	0	12	0	0	3	0	0	12	0	7	0	0	0	0	0	0	0	14	0	0	0	1	0	9
Flavobacterium johnsoniae	6	20	73	11	0	0	0	0	0	0	0	0	0	1	0	2	0	3	0	0	16	4	4	6	3	2	6	0	0	3	0	0	8	0	3	0	0	0	0	0	0	0	9	0	0	1	0	0	6
Flavobacterium psychrophilum	8	25	110	20	0	0	0	0	3	1	0	0	0	1	0	1	0	0	0	0	10	0	2	10	0	1	10	0	0	5	0	0	13	0	3	0	0	0	0	0	0	1	10	0	0	8	0	0	9
Flexistipes sinusarabici	4	6	102	11	0	0	0	0	0	0	0	0	0	0	0	0	0	0	0	1	14	0	0	0	3	2	6	0	0	0	0	0	0	0	0	0	0	0	0	0	0	0	0	0	0	0	0	0	0
Fluviicola taffensis	8	12	60	9	0	0	0	0	0	2	0	0	0	0	0	0	0	0	0	0	9	0	0	8	0	2	0	0	0	1	0	0	7	0	6	0	0	0	0	0	0	1	15	0	1	0	0	0	2
Francisella novicida	0	0	9	2	0	0	0	0	0	0	0	0	0	0	0	0	0	0	0	0	0	0	0	0	0	0	0	0	0	0	0	0	0	0	0	0	0	0	0	0	0	0	0	0	0	0	0	0	0
Francisella philomiragia	0	0	35	15	0	0	0	0	0	2	0	0	0	0	0	0	0	0	0	0	0	0	0	0	0	0	0	0	0	0	0	0	8	0	0	0	0	0	0	0	0	0	3	0	0	0	0	0	1
Francisella sp.	0	0	83	14	0	0	0	0	2	0	0	0	0	0	0	0	0	0	0	0	0	0	0	0	0	0	7	0	0	0	0	0	4	0	0	0	0	0	0	0	0	0	1	0	0	0	0	0	1
Francisella tularensis	0	0	2	0	0	0	0	0	0	0	0	0	0	0	0	0	0	0	0	0	0	0	0	0	0	0	0	0	0	0	0	0	0	0	0	0	0	0	0	0	0	0	2	0	0	0	0	0	0
Frankia alni	69	227	779	32	11	0	0	0	0	0	0	0	0	5	0	12	0	0	0	0	13	0	0	18	0	0	86	0	0	0	0	0	15	0	9	13	0	0	0	0	0	0	23	0	0	7	0	0	99
Frankia sp.	142	516	1807	93	48	0	7	9	29	0	0	0	0	5	0	35	0	15	0	0	18	0	0	30	12	66	219	7	0	6	0	0	28	0	26	31	0	0	9	5	0	7	24	0	0	8	0	0	184
Frankia symbiont	83	220	884	48	27	0	0	0	27	0	0	0	0	0	0	0	0	0	0	0	0	0	0	16	0	19	110	0	0	0	0	0	18	0	8	0	0	0	5	0	0	5	0	0	0	4	0	0	67
Frateuria aurantia	0	42	116	0	5	0	0	0	0	0	0	0	0	0	0	0	2	21	0	0	0	0	0	21	5	0	34	13	11	5	0	0	34	5	11	5	0	0	0	0	0	0	5	0	0	0	0	0	12
Fusobacterium nucleatum	528	150	1845	340	86	4	141	64	40	149	3	13	5	64	5	1	3	3	0	39	225	491	29	7234	16	48	207	4	2	20	0	6	5452	6	1474	23	8	8	17	48	5	29	23	6	3	98	44	1	154
Gallibacterium anatis	0	19	68	26	0	0	0	2	0	6	0	0	0	0	9	0	0	1	0	0	26	5	0	9	4	0	12	0	0	2	0	0	14	0	8	1	0	0	5	0	0	0	13	0	0	1	0	0	2
Gallionella capsiferriformans	2	10	22	5	0	0	0	0	0	0	1	0	0	0	0	0	0	0	0	0	0	0	0	0	2	0	3	0	0	0	0	0	5	0	2	0	0	0	0	0	0	0	0	0	0	0	0	0	0
Gamma proteobacterium	2	0	20	0	0	0	0	0	0	0	0	0	0	0	0	0	0	0	0	0	1	0	2	2	0	0	5	0	0	0	0	0	3	9	3	4	2	0	2	0	0	0	1	0	0	0	0	0	3
Gardnerella vaginalis	45	102	673	120	45	4	5	3	28	4	0	0	0	3	0	4	0	3	0	2	85	10	0	46	10	21	44	3	0	44	0	7	71	0	62	0	0	0	21	6	0	4	9	0	0	10	0	0	411
Gemmatimonas aurantiaca	0	42	143	0	0	0	0	0	0	0	0	0	0	0	0	0	0	0	0	0	0	0	0	0	0	0	0	0	0	0	0	0	0	0	0	0	0	0	0	0	0	0	0	0	0	0	0	0	12
Geobacillus kaustophilus	0	2	51	0	0	0	1	0	0	0	0	0	0	0	0	0	0	0	0	0	1	0	0	0	0	0	2	0	0	0	0	0	1	0	0	0	0	0	0	0	0	0	0	0	0	0	0	0	0
Geobacillus sp.	11	16	80	16	1	0	1	1	3	2	1	0	0	0	0	3	0	1	0	0	41	0	2	10	6	8	64	0	7	2	0	3	16	0	3	1	0	0	0	0	0	1	20	0	0	6	0	0	3
Geobacillus thermodenitrificans	4	13	37	9	1	0	0	0	0	0	0	0	0	0	0	0	0	2	0	0	23	0	1	10	2	5	17	0	0	0	0	0	8	0	1	0	0	0	0	0	0	0	2	0	0	0	0	0	2
Geobacillus thermoglucosidasius	2	4	14	7	0	0	0	0	1	0	0	0	0	0	0	0	0	0	0	0	4	0	0	0	0	0	2	0	0	0	0	0	1	0	1	0	0	0	0	0	0	0	0	0	0	0	0	0	0
Geobacillus thermoleovorans	0	0	3	0	0	0	0	0	0	0	0	0	0	0	0	0	0	0	0	0	0	0	0	0	0	0	3	0	0	0	0	0	0	0	0	0	0	0	0	0	0	0	0	0	0	0	0	0	0
Geobacter bemidjiensis	0	8	44	0	0	0	0	0	0	0	0	0	0	0	0	0	0	0	0	0	0	0	0	0	0	0	0	0	0	0	0	0	3	0	0	0	0	0	0	0	0	0	0	0	0	0	0	0	0
Geobacter lovleyi	2	10	32	9	0	0	0	0	2	0	0	0	0	0	0	0	0	0	0	0	10	0	1	0	0	2	5	0	0	0	0	0	0	0	2	0	0	0	0	0	0	0	3	0	0	0	0	2	5
Geobacter metallireducens	4	17	75	10	0	0	0	0	0	0	0	0	0	0	0	0	0	0	0	0	8	0	0	0	7	5	9	0	0	0	0	0	0	0	0	0	0	0	0	0	0	0	0	0	0	0	0	0	7
Geobacter sp.	3	45	157	13	0	0	0	0	0	0	0	0	0	3	0	4	0	0	0	0	0	0	3	0	3	4	4	0	0	0	0	0	12	0	0	0	0	0	0	0	0	0	3	0	0	0	0	0	11
Geobacter sulfurreducens	6	10	51	6	0	0	0	0	0	0	0	0	0	0	0	0	0	0	0	0	0	0	0	0	0	0	19	0	0	0	0	0	0	0	0	0	0	0	0	0	0	0	0	0	0	0	0	0	0
Geobacter uraniireducens	2	5	27	6	0	0	0	0	1	0	0	0	0	3	0	0	0	1	0	0	6	0	0	0	0	0	2	0	0	0	0	0	0	0	0	0	0	0	0	0	0	0	0	0	0	0	0	0	2
Geodermatophilus obscurus	206	514	1788	101	61	0	8	0	23	0	0	9	0	13	0	37	0	11	0	0	5	0	0	43	24	54	252	0	0	0	0	0	27	0	30	35	0	0	0	0	0	0	0	0	0	9	0	0	192
Glaciecola nitratireducens	0	0	26	0	0	0	0	0	0	0	0	0	0	0	0	0	0	0	0	0	0	0	3	2	0	1	3	0	0	0	0	0	2	0	0	0	0	0	0	0	0	0	1	0	0	0	0	0	0
Glaciecola sp.	0	0	25	0	0	0	0	0	1	0	0	0	0	0	0	0	0	0	0	0	0	0	1	2	1	1	3	0	0	0	0	0	2	0	1	0	0	0	0	0	0	0	3	0	0	0	0	0	0
Gloeobacter violaceus	4	36	144	7	0	0	0	0	0	0	0	0	0	0	0	0	0	0	0	0	0	0	0	11	0	9	16	0	0	0	0	0	6	0	0	0	0	0	0	0	0	0	0	0	0	0	0	0	6
Gluconacetobacter diazotrophicus	0	0	31	0	0	0	0	0	0	0	0	0	0	0	0	0	0	0	0	0	0	0	0	0	0	0	0	0	0	0	0	0	0	0	0	0	0	0	0	0	0	0	0	0	0	0	0	0	0
Gluconacetobacter xylinus	5	31	55	6	0	0	0	0	0	0	0	0	0	0	0	0	0	0	0	0	0	0	0	8	0	0	0	0	0	0	0	0	8	0	0	0	0	0	4	0	0	0	0	0	0	0	0	0	0
Gluconobacter oxydans	48	27	83	6	0	0	0	0	0	0	0	0	0	0	0	0	0	0	0	0	0	0	0	0	0	0	8	0	0	0	0	0	6	0	0	0	0	0	0	0	0	0	0	0	0	0	0	0	0
Gordonia bronchialis	86	240	829	45	36	0	0	0	22	0	0	0	0	0	0	0	11	0	0	0	0	0	0	38	15	21	75	0	0	0	0	0	15	0	18	17	0	0	8	0	0	0	0	0	0	0	0	0	106
Gordonia polyisoprenivorans	88	269	962	42	26	0	0	0	13	3	0	0	0	0	0	10	0	0	0	0	0	5	3	24	7	30	89	0	0	5	0	0	16	0	14	11	0	0	1	0	0	0	0	0	3	0	0	0	108
Gramella forsetii	6	14	86	15	0	0	0	0	1	1	0	0	0	2	0	0	0	1	0	0	11	0	0	7	0	1	3	0	0	2	0	0	6	0	3	0	0	0	0	0	0	0	4	0	0	0	0	0	5
Granulibacter bethesdensis	3	8	54	0	0	0	0	0	0	0	0	0	0	0	0	0	0	0	0	0	0	0	0	0	0	0	0	0	0	0	0	0	4	0	0	0	0	0	0	0	0	0	0	0	0	0	0	0	0
Granulicella mallensis	6	18	45	0	1	0	0	0	0	0	0	0	0	0	0	0	0	0	0	0	2	0	0	2	0	1	4	0	0	0	0	0	1	0	0	0	0	0	0	0	0	0	1	0	0	0	0	0	8
Granulicella tundricola	0	68	170	16	0	0	2	0	0	0	0	0	0	0	0	0	0	0	0	0	0	0	0	11	0	0	20	0	0	0	0	0	6	0	0	0	0	0	0	0	0	0	0	0	0	0	0	0	13
Haemophilus ducreyi	0	0	44	0	0	0	0	2	0	5	0	0	0	0	11	0	0	2	0	0	22	3	0	8	0	0	0	0	0	2	0	0	22	0	17	2	0	0	0	0	0	0	0	0	0	0	0	0	0
Haemophilus influenzae	13	17	138	56	0	0	174	25	29	279	2	23	0	19	52533	0	65	297	53	2	17	201670	4	169	2	0	51	4	0	4	0	0	211	27	3008	179	26	5	4	2	5	11	62	56	38	0	34	16	35
Haemophilus parainfluenzae	0	35	129	20	2	0	451	179	39	1785	31	218	0	1	155	0	668	5010	5	23	27	220	13	3268	0	0	18	0	0	2	0	0	1143	0	283	135	1	2	72	8	25	99	75	4	3	8	0	0	2
Haemophilus parasuis	0	0	59	0	1	0	2	5	0	12	0	0	0	0	15	0	0	5	0	0	14	3	0	7	0	0	13	0	0	2	0	0	16	0	21	6	0	2	2	2	0	1	23	0	0	5	0	0	2
Haemophilus somnus	0	26	310	22	0	0	1	0	0	4	0	0	0	6	9	0	0	2	0	0	27	5	0	35	0	8	0	8	2	8	0	0	53	0	16	2	0	0	3	0	0	1	7	0	0	0	0	0	6
Hahella chejuensis	2	0	22	0	0	0	0	0	0	0	0	0	0	0	0	0	0	0	0	0	3	0	0	2	0	0	3	2	2	1	0	0	4	0	0	0	0	0	0	0	0	0	2	0	0	0	0	0	0
Halalkalicoccus jeotgali	0	21	148	0	0	0	0	0	0	0	0	0	0	0	0	0	0	0	0	0	13	0	0	0	0	0	25	0	0	0	0	0	0	0	0	0	0	0	0	0	0	0	0	0	0	0	0	0	11
Halanaerobium hydrogeniformans	13	17	121	31	0	0	2	0	2	2	0	0	0	2	0	0	0	0	0	0	33	0	0	10	0	0	20	0	0	0	0	0	28	0	0	0	0	0	0	0	0	0	28	0	0	1	0	0	0
Haliangium ochraceum	12	78	302	19	5	0	0	0	0	0	0	0	0	3	0	0	0	2	0	0	0	0	0	0	7	0	29	0	0	0	0	0	0	0	0	0	0	0	0	0	0	4	13	0	0	3	0	0	38
Haliscomenobacter hydrossis	0	4	27	5	0	0	0	0	0	1	0	0	0	0	0	1	0	1	0	0	0	0	2	0	0	2	3	0	0	0	0	0	4	0	1	0	0	0	0	0	0	0	0	0	0	0	0	0	2
Haloarcula hispanica	0	20	94	0	0	0	0	0	0	0	0	0	0	0	0	0	0	0	0	0	5	0	0	0	0	0	8	0	0	0	0	0	0	0	0	0	0	0	0	0	0	0	0	0	0	0	0	0	13
Haloarcula marismortui	0	18	51	0	0	0	0	0	0	0	0	0	0	0	0	0	0	0	0	0	0	0	0	0	0	0	0	0	0	0	0	0	0	0	0	0	0	0	0	0	0	0	0	0	0	0	0	0	0
Haloferax volcanii	0	51	290	13	0	0	0	0	0	0	0	12	0	0	0	0	0	0	0	0	13	0	0	0	0	6	18	0	0	0	0	0	18	0	0	0	0	0	0	0	0	0	0	0	0	0	0	0	32
Halogeometricum borinquense	0	13	76	3	0	0	0	0	0	0	0	0	0	0	0	0	0	0	0	0	4	0	0	0	0	0	0	0	0	0	0	0	0	0	0	0	0	0	0	0	0	0	0	0	0	0	0	0	7
Halomicrobium mukohataei	7	30	147	9	0	0	0	0	0	0	0	0	0	0	0	0	0	0	0	0	0	0	0	0	0	0	0	0	0	0	0	0	0	0	0	0	0	0	0	0	0	0	0	0	0	0	0	0	14
Halomonas elongata	17	67	154	0	0	0	0	0	5	4	0	0	0	0	0	8	0	9	0	0	5	0	0	14	0	0	22	0	0	6	0	0	6	0	7	0	0	3	9	12	0	5	8	0	0	9	0	0	24
Halophilic archaeon	0	17	103	11	0	0	0	0	0	0	0	0	0	0	0	0	0	0	0	0	9	0	0	0	0	0	16	0	0	0	0	0	0	0	0	0	0	0	0	0	0	0	0	0	0	0	0	0	0
Halopiger xanaduensis	10	62	215	9	0	0	0	0	0	0	0	0	0	0	0	0	0	0	0	0	0	0	0	0	0	0	16	0	0	0	0	0	0	0	0	0	0	0	0	0	0	0	7	0	0	0	0	0	22
Haloquadratum walsbyi	1	10	26	2	0	0	0	0	0	0	0	0	0	0	0	0	0	0	0	0	8	0	0	1	0	0	2	0	0	0	0	0	0	0	0	0	0	0	0	0	0	0	2	0	0	0	0	0	2
Halorhabdus utahensis	0	39	103	0	0	0	0	0	0	0	0	0	0	0	0	0	0	0	0	0	0	0	0	6	0	0	11	0	0	0	0	0	4	0	0	0	0	0	0	0	0	0	0	0	0	0	0	0	0
Halorhodospira halophila	0	53	205	19	0	0	0	0	0	0	0	0	0	0	0	0	0	0	0	0	8	0	0	0	0	0	17	0	0	0	0	0	0	0	0	0	0	0	0	0	0	0	0	0	0	0	0	0	34
Halorubrum lacusprofundi	0	30	193	0	0	0	0	0	0	0	0	0	0	0	0	0	0	0	0	0	0	0	0	0	0	0	0	0	0	0	0	0	0	0	0	0	0	0	0	0	0	0	0	0	0	0	0	0	19
Haloterrigena turkmenica	0	11	168	0	0	0	0	0	0	0	0	0	0	0	0	0	0	0	0	0	0	0	0	0	0	0	13	0	0	0	0	0	0	0	0	0	0	0	0	0	0	0	0	0	0	0	0	0	22
Halothermothrix orenii	12	26	97	17	0	0	0	0	1	6	0	0	0	0	0	0	0	0	0	0	30	0	2	4	3	0	13	0	0	0	0	0	11	0	2	0	0	0	1	0	0	0	10	0	0	0	0	0	0
Halothiobacillus neapolitanus	3	0	31	7	0	0	0	0	2	0	43	0	0	0	0	0	0	0	0	0	4	0	0	0	0	3	2	0	0	0	0	0	0	0	2	0	0	0	0	0	0	0	0	0	0	0	0	0	2
Helicobacter acinonychis	4	3	31	0	0	0	0	0	0	0	0	0	0	0	0	0	0	0	0	0	8	0	0	0	0	0	5	0	0	0	0	0	8	0	0	0	0	0	0	0	0	0	0	0	0	0	0	0	0
Helicobacter bizzozeronii	0	8	21	3	0	0	0	0	0	0	0	0	0	0	0	2	0	0	0	0	4	0	0	7	0	0	4	0	0	0	0	0	3	0	0	0	0	0	0	0	0	0	0	0	0	0	0	0	0
Helicobacter felis	2	2	12	0	0	0	0	0	0	0	0	0	0	0	0	0	0	0	0	0	2	0	0	0	0	3	8	0	0	0	0	0	0	0	0	0	0	0	0	0	0	0	2	0	0	2	0	0	0
Helicobacter hepaticus	6	9	47	7	0	0	0	0	1	0	0	0	0	0	0	0	0	3	0	0	19	0	3	5	2	2	0	0	0	0	0	0	3	0	2	0	0	0	0	0	0	0	0	0	0	0	0	0	0
Helicobacter mustelae	11	13	38	11	0	0	0	0	0	0	0	0	0	0	0	0	0	0	0	0	7	0	3	0	0	0	10	0	0	0	0	0	16	0	0	0	0	0	0	0	0	0	8	0	0	0	0	0	0
Helicobacter pylori	8	16	152	5	0	0	0	0	2	0	0	0	0	0	0	0	0	0	0	0	7	0	0	9	0	0	9	0	0	0	0	0	16	0	0	0	0	0	0	0	0	0	0	0	0	0	0	0	0
Heliobacterium modesticaldum	16	22	113	18	3	0	0	0	2	0	0	0	0	0	0	0	0	0	0	0	19	0	0	5	0	2	10	0	0	0	0	2	6	0	0	0	0	0	0	0	0	0	0	0	0	0	0	0	6
Herbaspirillum seropedicae	12	67	217	13	0	0	0	0	0	0	0	0	0	0	0	0	0	0	0	0	0	0	0	0	4	0	31	0	0	0	0	0	20	0	9	0	0	0	0	0	0	0	0	0	0	0	0	0	22
Herminiimonas arsenicoxydans	0	4	15	3	1	0	0	0	0	0	1604	0	0	0	0	3	4	8	0	0	7	0	1	0	1	4	6	0	0	0	0	0	0	0	0	0	0	0	0	1	0	0	8	0	13	0	0	0	3
Herpetosiphon aurantiacus	2	5	20	3	1	0	0	0	1	0	0	0	0	0	0	0	0	0	0	0	6	0	0	0	0	0	3	0	0	0	0	0	3	0	0	0	0	0	0	0	0	0	0	0	0	0	0	0	0
Hippea maritima	6	10	74	14	0	0	0	0	1	0	0	0	0	0	0	0	0	0	0	0	15	0	1	4	0	0	2	0	0	0	0	0	5	0	0	0	0	0	1	0	0	0	0	0	0	0	0	0	2
Hirschia baltica	3	5	30	0	0	0	0	0	0	1	0	0	0	0	0	0	0	0	0	0	2	0	1	5	2	0	5	0	0	0	0	0	3	0	0	0	0	0	0	0	0	0	0	0	0	0	0	0	1
Hydrogenobaculum sp.	4	4	73	9	0	0	0	0	3	0	0	0	0	0	0	0	0	0	0	0	6	0	0	8	0	0	6	0	0	0	0	0	15	0	0	4	0	0	0	0	0	0	6	0	0	0	0	0	0
Hyperthermus butylicus	0	4	9	0	0	0	0	0	0	0	0	0	0	0	0	0	0	0	0	0	0	0	0	0	0	0	0	0	0	0	0	0	0	0	0	0	0	0	0	0	0	0	0	0	0	0	0	0	0
Hyphomicrobium denitrificans	0	0	0	0	0	0	0	0	0	0	0	0	0	0	0	0	0	0	0	0	0	0	0	0	0	0	0	0	0	0	0	0	0	0	0	0	0	0	0	0	0	0	0	0	0	4	0	0	5
Hyphomicrobium sp.	0	22	53	6	0	0	0	0	0	0	0	0	0	0	0	0	0	0	0	0	0	0	0	0	0	0	3	0	0	0	0	0	0	0	0	0	0	0	0	0	0	0	0	0	0	0	0	0	0
Hyphomonas neptunium	0	18	93	0	0	0	0	0	0	0	0	0	0	0	0	0	0	0	0	0	0	0	0	0	0	0	13	0	0	0	0	0	0	0	0	0	0	0	0	0	0	0	0	0	0	0	0	0	16
Idiomarina loihiensis	0	0	35	0	1	0	0	0	1	0	0	0	0	0	0	0	0	2	0	0	0	0	0	1	0	0	3	0	0	0	0	0	2	0	0	0	0	2	1	0	0	2	30	0	0	0	0	0	0
Ignicoccus hospitalis	0	7	24	0	0	0	0	0	0	0	0	0	0	0	0	0	0	0	0	0	0	0	0	0	0	0	0	0	0	0	0	0	0	0	0	0	0	0	0	0	0	0	0	0	0	0	0	0	0
Ignisphaera aggregans	0	3	22	2	0	0	0	0	0	0	0	0	0	0	0	0	0	0	0	0	6	0	0	0	0	0	0	0	0	0	0	0	6	0	0	0	0	0	0	0	0	0	2	0	0	0	0	0	6
Ilyobacter polytropus	0	22	210	0	0	0	2	0	2	6	0	0	0	11	0	0	0	0	0	0	0	0	2	0	8	3	12	0	0	0	0	0	0	0	0	0	0	0	1	0	0	0	3	0	0	1	0	0	0
Intrasporangium calvum	439	1354	4840	218	142	9	0	9	38	8	0	0	0	0	0	43	0	0	0	13	21	0	0	82	31	122	633	0	0	0	0	0	51	0	72	53	0	0	32	0	0	0	0	12	0	49	0	0	523
Isoptericola variabilis	1340	3617	13750	610	288	0	35	22	122	26	0	0	0	8	0	90	0	55	0	0	0	0	15	173	80	253	1635	0	0	34	0	0	101	0	135	179	0	0	48	12	0	27	0	8	0	43	0	0	1570
Isosphaera pallida	6	19	111	11	0	0	0	0	2	0	0	0	0	0	0	0	0	0	0	0	5	0	0	5	0	2	10	0	0	0	0	0	0	0	2	0	0	0	0	0	0	0	4	0	0	1	0	0	5
Jannaschia sp.	3	26	97	0	0	0	0	0	0	0	0	0	0	0	0	0	0	3	0	0	2	0	0	0	0	15	0	0	0	0	0	0	0	0	0	0	0	0	0	0	0	0	0	0	0	0	0	0	6
Janthinobacterium sp.	2	1	18	2	2	1	0	0	0	0	0	2	0	0	0	0	0	0	0	0	0	0	0	1	0	0	4	0	0	0	0	0	4	0	0	0	0	0	0	0	0	0	0	2	0	0	0	0	0
Jonesia denitrificans	108	297	883	60	21	0	3	3	43	2	0	3	0	7	0	5	0	4	0	0	4	0	4	55	20	31	147	0	0	0	0	0	23	0	15	17	0	0	16	4	0	4	0	0	0	20	0	0	130
Kangiella koreensis	0	5	33	4	0	0	0	0	0	0	0	0	0	0	0	0	0	0	0	0	3	0	0	0	0	0	1	0	0	0	0	0	2	0	0	0	0	0	0	0	0	0	0	0	0	1	0	0	1
Ketogulonicigenium vulgare	0	35	109	11	0	0	0	0	0	0	0	0	0	0	0	0	0	0	0	0	0	0	0	0	0	0	12	0	0	0	0	0	5	0	0	0	0	0	0	0	0	0	0	0	0	0	0	0	0
Kineococcus radiotolerans	639	1965	6107	329	191	0	21	14	70	16	0	12	0	11	0	88	0	28	0	0	0	0	10	183	45	183	863	0	0	11	0	0	57	0	94	96	0	0	24	9	0	13	0	7	0	53	0	0	676
Kitasatospora setae	133	476	1652	79	41	0	5	0	0	0	0	6	0	8	0	11	0	4	0	0	9	0	0	50	5	47	209	10	0	6	0	0	31	0	19	23	0	0	9	6	0	0	6	0	0	14	0	0	163
Klebsiella oxytoca	0	0	36	0	0	0	0	0	0	0	0	0	0	0	0	1	0	1	0	0	9	0	0	3	2	1	2	0	0	0	0	0	4	0	0	0	0	0	0	0	0	2	2	0	0	0	1	0	0
Klebsiella pneumoniae	0	0	17	0	0	0	0	0	0	0	0	0	0	0	0	0	0	0	0	0	0	0	0	4	0	0	5	0	0	0	0	0	21	48	11	0	0	22	14	15	6	3	343	0	0	0	8	17	0
Klebsiella variicola	0	0	0	0	0	0	0	0	0	0	0	0	0	0	0	0	0	0	0	0	0	0	0	0	0	0	0	0	0	0	0	0	0	0	0	0	0	0	0	0	0	0	4	0	0	0	0	3	0
Kocuria rhizophila	1878	5361	17139	1055	579	0	32	30	302	0	0	0	0	16	0	194	13	0	0	0	14	17	0	256	0	316	1609	0	0	32	0	0	105	0	134	114	0	0	34	0	0	19	24	12	0	0	0	0	1492
Kosmotoga olearia	3	10	52	7	0	0	0	0	0	0	0	0	0	0	0	0	0	0	0	0	7	0	1	3	0	0	10	0	0	0	0	0	0	0	0	0	0	0	0	0	0	0	0	0	0	0	0	0	0
Kribbella flavida	134	370	1303	79	53	0	0	0	16	0	0	0	0	0	0	12	0	7	0	0	5	0	0	28	18	31	154	0	0	0	0	0	23	0	19	21	0	0	10	9	0	8	15	0	0	14	0	0	157
Krokinobacter sp.	8	16	70	12	0	0	0	0	0	1	0	0	0	0	0	0	0	1	0	0	10	0	0	9	8	0	4	0	0	0	0	2	14	0	6	0	0	0	0	0	0	0	3	0	0	0	0	0	4
Kyrpidia tusciae	6	10	47	6	0	0	0	0	0	0	0	0	0	0	0	0	0	0	0	0	10	0	0	0	0	3	4	0	0	0	0	0	9	0	0	0	0	0	0	0	0	0	0	0	0	0	0	0	3
Kytococcus sedentarius	639	1889	6816	380	170	15	20	22	127	19	0	0	0	11	0	97	0	70	0	0	0	14	0	264	115	278	1204	36	0	31	0	0	85	0	110	93	0	0	47	16	0	13	0	32	0	59	0	0	902
Lacinutrix sp.	8	11	96	12	1	0	1	0	2	1	0	0	0	0	0	2	0	1	0	1	19	0	0	12	3	2	6	0	0	2	0	1	9	0	7	0	1	1	0	0	0	0	11	0	0	1	0	0	3
Lactobacillus acidophilus	10	35	132	25	21	0	3	0	43	4	0	0	0	0	2	0	0	2	0	0	39	2	7	9	12	7	63	1	1	2	0	1	18	0	5	0	0	0	2	6	0	0	8	0	0	3	0	0	12
Lactobacillus amylovorus	0	3	19	3	11	0	0	0	32	0	0	0	0	0	0	0	0	0	0	0	5	0	1	0	2	0	6	0	0	0	0	0	0	0	0	0	0	0	0	1	0	0	0	0	0	0	0	0	0
Lactobacillus brevis	6	17	56	11	15	1	0	2	5	0	0	0	0	0	0	0	0	2	0	0	15	0	3	5	2	5	47	0	0	2	0	0	16	0	3	0	0	0	2	0	0	1	0	0	0	3	0	0	7
Lactobacillus buchneri	7	19	67	12	6	0	0	0	4	2	0	0	0	0	0	1	0	3	0	0	20	0	2	5	4	4	36	0	0	2	0	2	21	0	2	0	0	0	2	0	0	1	0	0	0	2	0	0	4
Lactobacillus casei	11	90	112	105	54	9	1	0	25	0	0	0	0	0	0	4	0	2	0	0	328	2	2	1	1	4	20	41	14	8	0	23	105	3	10	12	1	2	5	1	0	1	0	0	55	10	0	2	24
Lactobacillus crispatus	12	23	72	13	11	1	1	1	1168	2	0	0	0	0	0	0	0	1	0	0	19	1	4	8	5	5	39	3	0	2	0	3	17	0	2	0	0	0	41	129	0	1	13	0	0	3	0	0	3
Lactobacillus delbrueckii	7	25	63	9	22	0	2	0	6	0	0	0	0	0	0	2	0	4	0	0	24	5	4	7	4	14	102	4	4	6	0	3	12	24	3	0	0	0	0	2	0	0	7	0	0	0	0	0	5
Lactobacillus fermentum	15	60	102	10	795	9	44	10	7512	38	0	0	0	5	0	0	0	8	4	5	59	273	0	14	8	116	8668	2	2	5	0	0	28	2	17	63	0	0	4	17	0	5	2	2	4	57	0	0	41
Lactobacillus gasseri	15	26	96	0	960	36	0	11	676	6	0	0	0	5	7	14	0	0	0	0	28	279	8	15	9	10	81	0	0	0	0	3	23	0	0	12	0	0	30	36	0	0	25	2	0	23	0	0	44
Lactobacillus helveticus	28	85	104	21	491	15	2	0	48	2	0	0	0	0	1	0	0	1	0	0	26	4	4	7	6	7	50	6	0	2	0	2	28	0	5	1	3	0	2	1	0	15	0	0	0	4	0	0	7
Lactobacillus johnsonii	13	40	105	23	75	4	4	2	15	3	0	0	0	0	0	1	0	2	0	0	49	31	4	9	3	7	68	2	1	4	0	0	23	0	6	7	0	0	3	0	0	0	4	0	0	5	0	0	4
Lactobacillus kefiranofaciens	10	27	75	16	67	3	0	0	26	2	0	0	0	0	0	0	0	2	0	0	19	8	6	8	2	9	34	0	0	3	0	1	14	0	3	0	0	0	3	2	0	0	0	0	0	2	0	0	3
Lactobacillus plantarum	8	28	141	15	16	0	1	2	8	1	0	0	0	0	0	2	0	5	0	0	22	2	1	4	5	11	45	0	1	3	0	2	16	0	3	2	0	0	2	0	0	0	0	0	0	4	0	0	3
Lactobacillus reuteri	10	46	55	12	119	2	0	0	35	1	0	0	0	0	0	0	0	4	0	0	24	2	2	6	4	7	119	0	0	3	0	2	14	0	2	0	0	0	2	4	0	6	2	0	0	2	0	0	3
Lactobacillus rhamnosus	7	8	42	45	591	116	0	3	18	1	0	0	0	0	0	37	0	2	3	9	15	0	2	4	5	36	42	3	0	5	0	1	8	64	313	211	40	0	4	0	0	0	0	0	12	3	0	0	55
Lactobacillus ruminis	18	42	141	20	6	0	2	0	5	1	0	0	0	0	0	0	0	2	0	0	33	0	4	10	9	6	48	2	0	10	0	0	30	0	4	0	0	0	2	0	0	0	0	0	0	9	0	0	7
Lactobacillus sakei	21	105	143	26	7	0	4	3	28	4	0	0	0	2	0	2	0	11	0	0	90	2	10	18	14	21	172	4	2	5	0	2	54	0	7	0	0	0	2	0	0	10	0	0	0	22	0	0	12
Lactobacillus salivarius	153	283	418	115	1337	67	96	11	157	33	3	2	0	4	2	27	10	27	0	2	105	239	15	38	21	307	676	21	9	63	0	8	177	0	29	19	0	1	50	11	0	5	11	4	2	30	0	1	234
Lactobacillus sanfranciscensis	20	58	102	176	11	0	4	0	11	6	0	0	0	0	0	2	0	2	0	0	37	0	5	18	10	14	88	2	0	2	0	2	25	0	9	0	0	0	2	0	0	0	0	0	0	4	0	0	10
Lactococcus garvieae	46	116	247	45	0	0	0	0	0	0	0	0	0	0	0	0	0	0	0	2	59	0	0	0	0	0	229	0	0	0	0	0	0	0	0	0	0	0	0	0	0	0	0	0	0	0	0	0	0
Lactococcus lactis	83	148	335	63	35	21	0	6	35	0	0	0	0	3	0	0	0	0	0	2	70	7	0	0	88	24	272	7	0	0	0	0	70	9	0	0	4	1	0	5	0	2	23	0	245	0	0	44	30
Laribacter hongkongensis	0	0	158	0	0	0	0	0	0	0	0	0	0	0	0	0	0	29	0	0	0	0	0	15	9	7	31	0	0	0	0	0	46	0	22	0	0	0	0	0	0	0	0	0	0	2	0	0	11
Lawsonia intracellularis	0	0	117	27	0	0	0	0	0	1	0	0	0	0	0	0	0	0	0	0	0	0	0	0	0	0	0	0	0	0	0	0	16	0	0	0	0	0	0	0	0	2	35	0	0	0	0	0	12
Leadbetterella byssophila	5	10	47	13	0	0	0	0	0	0	0	0	0	0	0	0	0	1	0	0	7	0	0	5	0	0	0	0	0	0	0	0	8	0	2	0	0	0	0	0	0	0	0	0	0	1	0	0	0
Legionella longbeachae	4	7	39	6	0	0	1	0	1	0	0	0	0	0	0	0	0	0	0	0	12	0	1	2	1	0	3	0	0	1	0	3	7	0	3	0	0	1	0	0	0	0	13	0	0	0	0	0	1
Legionella pneumophila	0	0	23	0	0	0	0	0	0	0	0	0	0	0	0	0	0	0	0	0	0	0	0	2	1	0	1	0	0	0	0	0	3	0	0	0	0	0	0	0	0	0	4	0	0	0	0	0	0
Leifsonia xyli	260	996	3155	0	87	0	0	14	0	12	0	0	0	0	0	35	0	0	0	0	8	0	0	95	22	82	0	0	0	0	0	0	33	0	55	59	0	0	19	0	0	0	0	0	0	0	0	0	0
Leptospira biflexa	0	0	2	0	0	0	0	0	0	0	0	0	0	0	0	0	0	0	0	0	0	0	0	0	0	0	0	0	0	0	0	0	0	0	0	0	0	0	0	0	0	0	0	0	0	0	0	0	0
Leptospira borgpetersenii	0	0	1	0	0	0	0	0	0	0	0	0	0	0	0	0	0	0	0	0	0	0	0	0	0	0	0	0	0	0	0	0	0	0	0	0	0	0	0	0	0	0	0	0	0	0	0	0	0
Leptospira interrogans	5	0	0	1	0	0	0	0	0	0	0	0	0	0	0	0	0	0	0	0	0	0	0	0	0	0	1	0	0	0	0	0	0	0	0	0	0	0	0	0	0	0	0	0	0	0	0	0	0
Leptospirillum ferrooxidans	1	0	19	4	0	0	0	0	0	0	0	0	0	0	0	0	0	0	0	0	11	0	0	0	0	0	7	0	0	0	0	0	0	0	0	0	0	0	0	0	0	0	0	0	0	0	0	0	0
Leptothrix cholodnii	18	91	313	25	26	8	0	0	0	0	0	0	0	14	0	0	0	0	0	0	0	0	0	11	12	10	50	0	0	0	0	0	18	0	10	0	0	0	0	0	0	0	26	0	0	0	0	0	13
Leptotrichia buccalis	9345	1267	12145	40121	61	11	1052	45	42	123	2	3	4	44	3	23	2	5	4	7	5182	15	15	2032	2099	11	158	4	2	505	0	20	3716	141	411	6	6	5	73	34	6	52	97	8	10	11	6	11	319
Leuconostoc citreum	0	37	0	0	2	0	0	0	0	0	0	0	0	0	0	0	0	1	0	0	0	0	0	10	3	0	0	0	0	0	0	0	0	0	3	0	0	0	2	0	0	0	0	0	0	3	0	0	4
Leuconostoc gasicomitatum	0	0	0	0	0	0	0	0	0	0	0	0	0	0	0	0	0	0	0	0	0	0	0	0	0	0	0	0	0	0	0	0	0	0	0	0	0	0	0	0	0	0	0	0	2	0	0	0	0
Leuconostoc kimchii	0	2	11	2	0	0	0	0	0	0	0	0	0	0	0	0	0	0	0	0	0	0	0	0	0	0	1	0	0	0	0	0	0	0	0	0	0	0	0	0	0	0	0	0	2	0	0	0	0
Leuconostoc mesenteroides	0	0	30	0	1	0	0	0	0	0	0	0	0	0	0	0	0	0	0	0	0	0	0	0	0	0	0	0	0	0	0	0	0	0	0	2	0	0	0	0	0	2	0	0	63	0	0	0	0
Leuconostoc sp.	0	0	7	0	0	0	0	0	0	0	0	0	0	0	0	0	0	0	0	0	0	0	0	0	0	0	4	0	0	2	0	0	0	0	0	0	0	0	0	0	0	0	0	0	0	0	0	0	0
Listeria innocua	13	18	59	10	1	0	2	2	3	4	0	0	0	0	0	0	0	2	0	0	25	0	2	8	4	6	48	0	0	2	0	0	13	0	3	0	0	0	1	0	0	0	12	0	0	3	0	0	2
Listeria ivanovii	11	19	58	20	2	0	3	1	8	4	0	0	0	1	0	1	0	3	0	0	28	5	5	7	10	9	55	1	1	2	0	3	16	0	8	0	0	0	2	1	0	2	2	2	0	4	0	1	3
Listeria monocytogenes	10	21	80	15	2	0	2	1	4	3	0	1	0	1	0	2	0	2	0	0	25	1	3	6	5	7	52	2	1	5	0	2	11	0	5	0	0	0	1	0	0	0	1	0	0	4	0	0	3
Listeria seeligeri	12	25	99	13	3	0	2	1	3	4	0	0	0	1	0	0	0	2	0	0	24	0	3	10	5	9	60	1	1	4	0	3	13	0	4	0	0	0	1	0	0	0	9	0	0	2	0	0	2
Listeria welshimeri	15	31	85	13	2	0	3	0	6	3	0	0	0	1	0	0	0	3	0	0	32	0	5	9	7	9	72	1	1	3	0	3	15	0	4	0	0	0	2	0	0	0	6	0	0	8	0	0	4
Lysinibacillus sphaericus	14	29	92	0	0	0	0	0	0	0	0	1	0	0	0	3	0	0	0	0	0	0	0	0	0	16	75	0	0	0	0	7	0	0	0	0	0	0	0	0	0	1	5	0	0	0	0	0	0
Macrococcus caseolyticus	0	37	140	0	0	0	10	7	19	15	7	2	0	4	0	16	0	6	0	0	59	0	0	34	10	84	237	6	5	20	0	20	0	0	19	3	0	0	5	0	0	8	0	1	0	9	29	0	0
Magnetococcus sp.	0	0	32	0	0	0	0	0	0	0	0	0	0	0	0	0	0	0	0	0	0	0	0	0	0	0	3	0	0	0	0	0	2	0	0	0	0	0	0	0	0	0	2	0	0	1	0	0	1
Magnetospirillum magneticum	12	59	230	15	0	0	0	0	5	0	0	0	0	0	0	9	0	1	0	0	0	0	0	0	0	2	25	0	0	0	0	0	0	0	0	0	0	0	0	0	0	0	8	0	0	0	0	0	16
Mahella australiensis	0	11	99	7	0	0	0	0	0	0	0	0	0	0	0	0	0	0	0	0	0	0	1	3	0	0	4	0	0	0	0	0	5	0	2	0	0	0	1	0	0	0	7	0	0	0	0	0	2
Mannheimia succiniciproducens	0	26	112	18	0	0	2	2	0	6	1	0	0	0	6	0	0	5	0	0	26	7	0	8	0	0	10	0	0	0	0	0	23	0	13	2	0	0	0	0	0	1	8	0	0	0	0	0	2
Maribacter sp.	6	9	54	9	0	0	0	0	1	2	0	0	0	0	0	1	0	1	0	0	13	0	0	0	2	1	5	0	0	0	0	0	6	0	3	0	0	0	0	0	0	0	0	0	0	0	0	0	4
Maricaulis maris	0	39	153	0	0	0	0	0	0	0	0	0	0	0	0	0	0	0	0	0	0	0	0	0	0	5	16	0	0	0	0	0	0	0	0	0	0	0	0	0	0	0	0	0	0	0	0	0	18
Marinithermus hydrothermalis	0	109	454	35	0	0	0	0	0	0	0	0	0	0	0	0	0	0	0	0	0	0	0	15	0	0	0	0	0	0	0	0	0	0	0	0	0	0	0	0	0	0	0	0	0	0	0	0	53
Marinitoga piezophila	13	20	142	29	0	0	4	0	5	1	0	0	0	6	0	12	0	23	0	0	26	18	4	12	26	77	26	0	0	19	0	11	12	0	14	0	0	0	0	0	0	0	10	0	0	1	0	0	26
Marinobacter aquaeolei	3	4	15	0	0	0	0	0	0	0	26	0	0	0	0	0	0	1	0	0	0	0	0	2	0	0	1	0	0	0	0	0	9	24	9	22	9	0	0	0	4	9	21	1	0	0	0	10	3
Marinomonas mediterranea	2	4	20	5	0	0	0	0	0	0	0	0	0	0	0	0	0	0	0	0	4	0	0	3	0	0	5	1	1	1	0	0	2	0	0	0	0	0	1	1	0	0	2	1	0	0	0	0	1
Marinomonas posidonica	5	7	31	6	0	0	0	0	1	0	0	0	0	0	0	0	0	1	0	0	6	0	1	3	1	1	5	0	0	0	0	0	2	0	0	0	0	0	0	0	0	0	1	0	0	0	0	0	2
Marinomonas sp.	3	5	39	5	1	0	0	0	1	2	0	0	0	1	0	0	0	0	0	0	8	0	1	3	1	1	6	0	0	0	0	1	3	0	1	1	0	0	0	1	0	1	2	1	0	0	0	0	2
Marivirga tractuosa	5	8	69	8	0	0	1	0	1	2	0	0	0	0	0	0	0	0	0	0	13	0	0	7	2	2	2	0	0	0	0	0	5	0	1	0	0	0	0	0	0	0	13	0	0	0	0	0	2
Megasphaera elsdenii	1102	604	3795	697	5	0	3	1	17	11	4	0	0	0	2	0	0	4	0	0	1026	4	0	169	16	22	33	0	0	2	0	4	134	2	4	0	0	0	6	0	0	13	0	0	0	0	0	0	11
Meiothermus ruber	11	20	100	7	15	0	0	0	10	0	0	0	0	0	0	0	0	0	0	0	0	0	0	14	0	0	33	0	0	0	0	0	23	0	8	0	0	0	0	0	0	0	0	0	0	0	0	0	13
Meiothermus silvanus	0	30	159	8	0	0	0	0	0	0	0	0	0	0	0	0	0	0	0	0	0	0	0	18	0	0	15	0	0	0	0	0	0	0	0	0	0	0	0	0	0	0	0	0	0	0	0	0	11
Melissococcus plutonius	7	22	78	6	2	0	3	2	4	4	0	0	0	0	0	0	0	4	0	0	21	0	11	13	7	9	83	2	1	9	0	1	29	0	6	0	0	0	2	0	0	0	0	0	0	11	0	0	2
Mesoplasma florum	6	15	105	35	0	0	0	4	5	5	0	0	0	0	0	0	0	0	0	0	14	0	0	18	3	9	42	0	0	11	0	3	15	0	4	64	0	0	0	0	0	0	5	0	0	0	0	0	3
Mesorhizobium ciceri	0	12	55	6	0	0	0	0	2	0	0	0	0	0	0	0	0	0	0	0	0	0	1	0	0	0	8	0	0	0	0	0	0	0	0	0	0	0	0	0	0	0	1	0	0	0	0	0	5
Mesorhizobium loti	0	39	154	10	0	0	0	0	0	0	0	0	0	0	0	0	0	0	0	0	0	0	0	0	0	0	15	0	0	0	0	0	0	0	0	0	0	0	0	0	0	0	0	0	0	0	0	0	6
Mesorhizobium opportunistum	0	34	105	11	0	0	0	0	3	0	0	0	0	2	0	0	0	0	0	0	0	0	0	0	0	0	16	0	0	0	0	0	0	0	0	0	0	0	0	0	0	0	10	0	0	0	0	0	8
Metallosphaera cuprina	2	2	13	8	0	0	0	0	0	0	0	0	0	0	0	0	0	0	0	0	3	0	0	0	0	0	0	0	0	0	0	0	2	0	0	0	0	0	0	0	0	0	0	0	0	0	0	0	0
Metallosphaera sedula	0	3	21	2	0	0	0	0	0	0	0	0	0	0	0	0	0	0	0	0	3	0	0	0	0	0	2	0	0	0	0	0	0	0	0	0	0	0	0	0	0	0	0	0	0	0	0	0	0
Methanobacterium sp.	7	19	98	27	0	0	0	0	0	0	0	0	0	0	0	0	0	0	0	0	13	0	0	12	2	10	16	0	0	0	0	0	7	0	5	0	0	0	0	0	0	0	21	0	0	0	0	0	4
Methanobrevibacter ruminantium	7	13	162	26	0	0	0	0	0	2	0	0	0	15	0	0	0	0	0	0	31	0	4	6	9	5	24	0	0	0	0	0	12	0	12	18	0	0	0	0	0	0	36	0	0	0	0	0	2
Methanobrevibacter smithii	5	18	111	13	0	0	0	0	2	0	0	0	0	0	0	0	0	0	0	0	13	0	0	7	2	7	24	0	0	0	0	0	14	0	2	0	0	0	1	0	0	0	10	0	0	6	0	0	10
Methanocaldococcus fervens	1	14	68	12	0	0	2	0	8	0	0	0	0	0	0	0	0	0	0	0	15	0	2	5	0	9	40	0	0	0	0	0	7	0	9	0	0	0	0	0	0	0	9	0	0	0	0	0	1
Methanocaldococcus infernus	6	20	54	10	0	0	0	0	0	0	0	0	0	0	0	0	0	0	0	0	0	0	2	6	0	0	9	0	0	0	0	0	6	0	0	0	0	0	0	0	0	0	21	0	0	0	0	0	0
Methanocaldococcus jannaschii	3	14	85	12	0	0	0	0	0	0	0	0	0	0	0	0	0	0	0	0	13	0	0	4	2	8	16	0	0	14	0	0	5	0	0	0	0	0	0	0	0	0	20	0	0	0	0	0	3
Methanocaldococcus sp.	1	22	60	14	0	0	2	0	2	0	0	0	0	0	0	0	0	0	0	0	20	0	0	5	0	0	30	0	0	7	0	0	15	0	0	0	0	0	0	0	0	0	11	0	0	0	0	0	3
Methanocaldococcus vulcanius	3	30	228	22	0	0	7	0	2	0	0	0	0	0	0	0	0	0	0	0	18	8	13	3	20	9	31	0	0	8	0	1	23	0	0	13	0	0	0	0	0	0	25	0	0	0	0	0	0
Methanocella paludicola	6	11	49	0	0	0	0	0	0	0	0	0	0	0	0	0	0	0	0	0	0	0	0	0	0	0	7	0	0	0	0	0	5	0	0	0	0	0	0	0	0	0	0	0	0	0	0	0	0
Methanocella sp.	0	6	28	13	0	0	0	0	0	0	0	0	0	0	0	0	0	0	0	0	4	0	0	0	0	0	0	0	0	0	0	0	0	0	0	0	0	0	0	0	0	0	0	0	0	0	0	0	19
Methanococcoides burtonii	2	9	32	9	0	0	0	0	0	0	0	0	0	9	0	0	0	0	0	0	5	0	0	2	0	2	3	0	0	0	0	0	3	0	0	0	0	0	0	0	0	0	2	0	0	0	0	0	0
Methanococcus aeolicus	8	26	165	40	0	0	0	0	9	0	0	0	0	0	0	0	0	0	0	0	48	0	0	4	3	18	31	0	2	13	0	0	22	0	0	38	0	0	0	0	0	0	55	0	0	0	0	0	14
Methanococcus maripaludis	7	37	201	66	0	0	0	0	0	0	0	0	0	0	0	0	0	0	0	0	30	0	0	22	2	15	26	0	0	1	0	0	14	0	0	0	0	0	0	0	0	0	43	0	0	0	0	0	7
Methanococcus vannielii	6	3	96	18	0	0	0	0	0	0	0	0	0	15	0	0	0	0	0	0	8	0	0	5	0	0	16	0	0	0	0	0	11	0	13	10	0	0	0	0	0	0	19	0	0	13	0	0	7
Methanococcus voltae	14	22	168	33	0	0	5	0	9	0	0	0	0	11	0	0	0	0	0	0	12	0	0	29	5	28	41	10	7	9	0	0	8	0	0	9	9	0	0	0	0	0	20	0	0	0	0	0	8
Methanocorpusculum labreanum	5	3	30	0	0	0	0	0	0	0	0	0	0	0	0	0	0	0	0	0	4	0	0	0	0	0	0	0	0	0	0	0	2	0	0	0	0	0	0	0	0	0	0	0	0	0	0	0	0
Methanoculleus marisnigri	9	14	84	10	0	0	0	0	0	0	0	0	0	0	0	0	0	0	0	0	0	0	0	8	0	0	15	0	0	0	0	0	0	0	0	0	0	0	0	0	0	0	0	0	0	0	0	0	8
Methanohalobium evestigatum	0	29	75	5	0	0	0	0	0	0	0	0	0	0	0	0	0	0	0	0	4	0	0	1	0	0	3	0	0	0	0	0	7	0	0	0	0	0	0	0	0	0	12	0	0	0	0	0	8
Methanohalophilus mahii	1	6	28	0	0	0	0	0	0	0	0	0	0	0	0	0	0	0	0	0	9	0	0	0	0	0	1	0	0	0	0	0	3	0	0	0	0	0	0	0	0	0	6	0	0	0	0	0	0
Methanoplanus petrolearius	0	2	13	2	0	0	0	0	0	0	0	0	0	0	0	0	0	0	0	0	2	0	0	0	1	1	5	0	0	0	0	0	1	0	0	0	0	0	0	0	0	0	2	0	0	0	0	0	0
Methanopyrus kandleri	0	0	47	0	0	0	0	0	0	0	0	0	0	0	0	0	0	0	0	0	0	0	0	0	0	0	0	0	0	0	0	0	0	0	0	0	0	0	0	0	0	0	0	0	0	0	0	0	0
Methanoregula boonei	0	4	12	0	0	0	0	0	0	0	0	0	0	0	0	0	0	0	0	0	0	0	0	0	0	0	0	0	0	0	0	0	3	0	0	0	0	0	0	0	0	0	0	0	0	0	0	0	0
Methanosaeta concilii	0	0	30	0	0	0	0	0	0	0	0	0	0	0	0	0	0	0	0	0	2	0	0	4	0	6	5	0	0	0	0	0	0	0	0	0	0	0	0	0	0	0	0	0	0	0	0	0	0
Methanosaeta thermophila	0	7	29	0	0	0	0	0	0	0	0	0	0	0	0	0	0	0	0	0	0	0	0	4	0	0	0	0	0	0	0	0	0	0	0	0	0	0	0	0	0	0	0	0	0	0	0	0	0
Methanosalsum zhilinae	5	2	43	12	0	0	0	0	0	0	0	0	0	0	0	0	0	0	0	0	6	0	0	6	0	6	7	0	0	0	0	0	4	0	0	0	0	0	0	0	0	0	0	0	0	0	0	0	0
Methanosarcina acetivorans	0	3	28	4	0	0	0	0	2	0	0	0	0	0	0	0	0	0	0	0	4	0	0	2	3	0	3	1	0	3	0	0	2	0	1	1	0	0	0	0	0	0	3	0	0	0	0	0	2
Methanosarcina barkeri	1	8	46	10	0	0	1	0	0	0	0	0	0	0	0	0	1	0	1	0	8	0	3	2	1	0	7	0	0	1	0	0	4	0	4	0	0	0	0	0	3	0	9	0	1	0	0	0	10
Methanosarcina mazei	2	20	33	5	0	0	0	0	5	0	0	0	0	9	0	0	0	0	0	0	7	0	1	6	0	6	4	0	0	0	0	0	5	0	0	0	0	0	0	0	0	0	24	0	0	0	0	0	0
Methanosphaera stadtmanae	6	24	133	33	0	0	0	0	8	0	0	0	0	0	0	0	0	0	0	0	22	0	0	5	2	42	16	0	0	3	0	0	8	0	8	25	0	0	0	0	0	18	264	0	0	0	0	0	8
Methanosphaerula palustris	0	0	26	0	0	0	0	0	0	0	0	0	0	0	0	0	0	0	0	0	3	0	0	4	0	0	0	0	0	1	0	0	2	0	0	0	0	0	0	0	0	0	0	0	0	0	0	0	4
Methanospirillum hungatei	2	4	26	2	0	0	0	0	0	0	0	0	0	0	0	0	0	0	0	0	6	0	2	3	0	1	2	0	0	0	0	0	1	0	1	0	0	0	0	0	0	0	1	0	0	0	0	0	0
Methanothermobacter marburgensis	2	2	19	10	0	0	0	0	0	0	0	0	0	0	0	0	0	0	0	0	0	0	0	0	0	0	0	0	0	0	0	0	0	0	0	0	0	0	0	0	0	0	0	0	0	0	0	0	0
Methanothermobacter thermautotrophicus	0	2	22	7	0	0	0	0	0	0	0	0	0	0	0	0	0	0	0	0	0	0	0	0	0	3	0	0	0	0	0	0	0	0	0	0	0	0	0	0	0	0	0	0	0	0	0	0	0
Methanothermococcus okinawensis	4	44	237	49	0	0	0	0	0	0	0	0	0	19	0	0	0	0	0	0	29	0	0	17	8	0	24	7	0	18	0	8	16	0	13	0	0	0	0	0	0	0	40	0	0	14	0	0	11
Methanothermus fervidus	3	17	63	13	0	0	0	0	0	0	0	0	0	0	0	0	0	0	0	0	8	0	0	12	0	0	15	0	0	0	0	0	3	0	0	0	0	0	0	0	0	0	0	0	0	0	0	0	0
Methanotorris igneus	4	5	98	10	0	0	0	0	0	0	0	0	0	0	0	0	0	0	0	0	8	0	2	0	0	0	17	0	0	3	0	0	20	0	2	0	0	0	0	0	0	0	3	0	0	0	0	0	0
Methylacidiphilum infernorum	6	2	35	7	0	0	0	0	0	0	0	0	0	0	0	0	0	0	0	0	8	0	0	0	0	0	3	0	0	0	0	0	2	0	0	0	0	0	0	0	0	0	2	0	0	0	0	0	1
Methylibium petroleiphilum	19	82	349	13	0	0	0	0	0	0	0	0	0	0	0	0	0	0	0	0	0	0	0	0	0	15	64	0	0	0	0	0	27	23	0	0	30	0	0	0	0	0	0	0	0	0	0	0	32
Methylobacillus flagellatus	0	25	32	3	0	0	0	0	0	0	9	0	0	0	0	0	0	3	0	0	8	0	0	3	0	0	2	0	0	0	0	0	29	0	8	5	0	0	0	0	0	0	0	0	2	0	0	0	3
Methylobacterium chloromethanicum	0	0	70	0	0	0	0	0	0	0	0	0	0	0	0	0	0	0	0	0	0	0	0	0	0	0	0	0	0	0	0	0	0	0	0	0	0	0	0	0	0	0	0	0	0	0	0	0	0
Methylobacterium extorquens	0	0	161	0	0	0	0	0	0	0	0	0	0	0	0	0	0	0	0	0	0	0	0	0	0	0	14	0	0	0	0	0	5	0	0	0	0	0	0	0	0	0	0	0	0	0	0	0	10
Methylobacterium nodulans	0	69	211	0	4	0	0	0	0	0	0	0	0	0	0	0	0	0	0	0	0	0	0	8	0	6	20	0	0	0	0	0	7	0	0	0	0	0	0	0	0	0	6	0	0	5	0	0	15
Methylobacterium populi	0	0	217	0	0	0	0	0	15	0	0	0	0	0	0	0	0	0	0	0	0	0	0	0	0	0	28	0	0	0	0	0	0	0	0	9	0	0	0	0	0	0	0	0	0	0	0	0	23
Methylobacterium radiotolerans	0	112	383	0	0	0	0	0	0	0	0	0	0	0	0	0	0	4	0	0	0	0	0	0	0	7	44	0	0	0	0	0	16	0	0	7	0	0	0	0	0	0	22	0	0	0	0	0	61
Methylobacterium sp.	0	49	229	0	0	0	0	0	0	0	0	0	0	0	0	0	0	0	0	0	0	0	7	11	0	9	36	7	0	0	0	0	10	0	0	0	0	0	0	0	0	0	0	0	0	0	0	0	30
Methylocella silvestris	0	0	94	0	0	0	0	0	0	0	0	0	0	0	0	0	0	0	0	0	0	0	0	0	0	0	6	0	0	0	0	0	0	0	0	0	0	0	0	0	0	0	0	0	0	0	0	0	5
Methylococcus capsulatus	7	35	111	0	0	0	0	0	0	0	0	0	0	0	0	0	0	0	0	0	18	0	5	0	0	0	9	0	0	0	0	0	9	0	0	5	2	0	0	0	0	0	14	16	0	0	0	0	9
Methylomicrobium alcaliphilum	0	0	16	0	0	0	0	0	1	0	0	0	0	0	0	0	0	0	0	0	4	0	2	2	0	1	5	0	0	0	0	0	2	0	0	0	0	0	0	0	0	0	0	0	0	0	0	0	1
Methylomonas methanica	0	0	26	6	0	0	0	0	0	0	0	0	0	0	0	0	0	0	0	0	0	0	0	2	0	0	3	0	2	0	0	0	4	11	4	6	6	0	1	0	0	0	3	0	0	0	0	0	5
Methylotenera mobilis	0	0	32	0	0	0	0	0	0	0	0	0	0	0	0	0	0	0	0	0	0	0	1	3	1	0	0	0	0	0	0	0	0	0	2	0	0	0	0	0	0	0	3	0	0	0	0	0	0
Methylotenera versatilis	0	8	43	0	0	0	0	0	0	0	0	0	0	0	0	0	0	1	0	0	0	1	2	4	0	0	0	0	0	0	0	0	4	0	8	0	0	0	0	0	0	0	7	0	0	1	0	0	0
Methylovorus glucosetrophus	4	0	20	8	0	0	0	0	0	0	0	0	0	0	0	0	0	0	0	0	5	0	0	0	0	0	3	0	0	0	0	0	0	0	0	0	0	0	0	0	0	0	0	0	0	0	0	0	0
Methylovorus sp.	0	0	13	0	0	0	0	0	0	0	0	0	0	0	0	0	0	0	0	0	0	0	0	0	0	1	3	0	0	0	0	0	5	0	2	0	0	0	0	0	0	0	0	0	0	0	0	0	0
Micavibrio aeruginosavorus	0	0	27	0	0	0	0	0	0	0	0	0	0	0	0	0	0	0	0	0	0	0	0	0	0	0	4	0	0	0	0	0	0	0	0	0	0	0	0	0	0	0	0	0	0	0	0	0	0
Microbacterium testaceum	383	1274	4104	178	130	0	12	0	43	0	0	0	0	14	0	29	0	0	0	0	25	0	10	49	17	53	419	0	0	9	0	0	21	0	31	28	0	0	17	10	0	0	0	0	0	0	0	0	461
Micrococcus luteus	1420	4212	14497	891	403	0	28	48	200	32	0	0	0	42	0	133	0	65	0	0	17	0	0	261	102	278	1591	0	0	28	0	0	109	21	194	137	0	0	32	20	0	13	0	27	0	99	0	0	1464
Microcystis aeruginosa	0	0	21	0	0	0	0	0	0	0	0	0	0	0	0	0	0	0	0	0	4	0	0	1	1	0	3	0	0	0	0	0	0	0	0	0	0	0	0	0	0	0	3	0	0	0	0	0	1
Microlunatus phosphovorus	106	354	1213	59	70	0	0	0	18	0	0	7	0	0	0	15	0	15	0	0	6	0	0	23	39	21	146	0	0	0	0	0	49	0	33	32	0	0	7	0	0	5	0	6	0	27	0	0	146
Micromonospora aurantiaca	14	54	249	12	9	0	0	0	7	0	0	0	0	15	0	0	0	0	0	0	0	0	0	0	0	30	35	0	0	0	0	0	0	0	9	22	0	0	0	0	0	0	0	0	0	0	0	0	30
Micromonospora sp.	32	89	303	16	5	0	0	0	0	0	0	0	0	7	0	0	0	0	0	0	0	0	0	11	0	17	32	0	0	0	0	0	5	0	7	11	0	0	0	0	7	0	0	0	0	12	0	0	32
Mobiluncus curtisii	165	522	1777	119	32	0	9	4	73	5	0	3	0	11	0	9	0	7	0	0	16	0	3	143	20	45	186	0	0	5	0	0	23	0	10	0	0	0	27	8	0	8	0	0	0	37	0	0	201
Moorella thermoacetica	0	0	0	0	0	0	0	0	0	0	0	0	0	0	0	0	0	0	0	0	0	0	0	5	0	0	0	0	0	0	0	0	0	0	0	0	0	0	3	0	0	0	0	0	0	0	0	0	0
Moraxella catarrhalis	0	0	75	0	0	0	0	0	0	0	0	0	0	0	0	0	0	0	0	0	0	1	0	12	4	0	7	0	0	0	0	0	83	0	0	0	0	0	0	0	0	0	0	0	0	0	0	0	3
Muricauda ruestringensis	4	12	62	9	0	0	0	0	2	0	0	0	0	0	0	1	0	1	0	0	10	0	0	0	1	1	4	0	0	1	0	0	14	0	3	0	0	0	0	0	0	0	0	0	0	2	0	0	5
Mycobacterium abscessus	89	261	704	48	0	0	0	0	0	7	0	0	0	0	0	7	0	0	0	0	5	0	0	16	5	0	77	0	0	0	0	256	13	12	531	185	6	0	7	0	0	5	4	0	0	7	0	4	106
Mycobacterium avium	43	146	482	23	23	0	0	0	0	0	0	0	0	0	0	0	0	0	0	0	0	0	0	0	2042	0	60	0	0	0	0	0	9	0	13	7	0	0	2	0	0	0	0	0	0	177	0	0	45
Mycobacterium canettii	17	52	187	13	0	0	0	0	0	0	0	0	0	0	0	0	0	0	0	0	0	0	0	0	0	0	0	6	0	6	0	0	3	0	0	0	0	0	0	0	0	0	0	0	0	0	0	0	67
Mycobacterium gilvum	0	18	51	0	0	0	0	0	0	0	0	0	0	0	0	0	0	0	0	0	0	0	0	7	0	0	12	0	0	0	0	0	6	0	0	0	0	0	0	0	0	0	0	0	0	0	0	0	10
Mycobacterium intracellulare	28	74	336	9	19	0	0	0	0	0	0	0	0	0	0	0	0	5	0	0	56	0	0	0	41	0	60	0	0	0	0	0	9	0	8	0	0	0	0	0	0	0	0	0	0	0	0	0	59
Mycobacterium leprae	0	7	9	0	0	0	0	0	0	0	0	0	0	0	0	0	0	0	0	0	0	0	0	0	0	0	3	0	0	0	0	0	0	0	0	0	0	0	0	0	0	0	0	0	0	0	0	0	3
Mycobacterium marinum	0	29	96	0	0	0	0	0	0	0	0	0	0	0	0	0	0	0	0	0	0	0	0	3	0	0	0	0	0	0	0	0	0	0	0	0	0	0	0	0	0	0	0	0	0	0	0	0	0
Mycobacterium rhodesiae	37	135	499	20	0	4	0	0	9	0	0	0	0	0	0	5	0	0	0	0	6	0	0	16	4	0	39	0	0	8	0	0	3	0	5	8	0	0	0	0	0	0	0	0	0	0	0	0	56
Mycobacterium smegmatis	66	220	862	52	22	0	0	0	23	3	0	0	0	3	0	7	0	0	0	0	0	0	0	21	11	16	102	0	0	0	0	0	18	0	0	23	0	0	4	0	0	0	8	0	0	8	0	0	108
Mycobacterium sp.	120	406	1304	59	0	0	0	0	0	0	0	0	0	0	0	20	0	10	0	0	0	0	0	23	23	34	160	0	0	0	0	0	16	0	25	30	0	0	6	6	0	0	9	0	0	0	0	0	201
Mycobacterium ulcerans	0	16	62	0	0	0	0	0	0	0	0	0	0	0	0	0	0	0	0	0	0	0	0	0	0	0	0	0	0	0	0	0	0	0	0	0	0	0	0	0	0	0	0	0	0	0	0	0	0
Mycobacterium vanbaalenii	45	148	636	39	0	0	4	0	15	0	0	0	0	8	0	0	0	0	0	0	0	0	0	19	4	14	83	0	0	0	0	0	4	0	0	8	0	0	0	0	0	0	0	0	0	0	0	0	61
Mycoplasma agalactiae	5	22	71	15	0	0	0	0	0	0	0	0	0	0	0	0	0	0	0	0	15	0	3	19	0	3	28	0	0	0	0	0	5	0	0	0	0	0	0	0	0	0	0	0	0	0	0	0	0
Mycoplasma arthritidis	10	11	67	26	0	0	0	0	0	0	0	0	0	0	0	0	0	0	0	0	6	7	0	151	2	0	13	0	0	0	0	0	17	0	6	0	0	0	0	0	0	0	0	0	0	2	0	0	0
Mycoplasma bovis	0	0	29	12	0	0	0	0	0	0	0	0	0	0	0	0	0	0	0	0	8	0	0	8	2	0	9	0	0	0	0	0	4	0	0	0	0	0	0	0	0	0	0	0	0	0	0	0	0
Mycoplasma capricolum	4	9	32	17	0	0	0	0	0	0	0	0	0	0	0	0	0	0	0	0	12	0	0	3	0	0	10	0	0	0	0	0	26	0	5	0	0	0	0	0	0	0	0	0	0	0	0	0	0
Mycoplasma conjunctivae	6	13	83	38	0	0	0	0	8	0	0	0	0	2	0	0	0	0	0	0	18	0	0	14	0	0	13	0	0	4	0	0	11	0	0	4	0	0	0	0	0	0	4	0	0	0	0	0	0
Mycoplasma crocodyli	13	43	129	36	0	0	0	0	0	0	0	0	0	0	0	0	0	0	0	0	17	0	0	20	0	10	21	0	0	0	0	0	10	0	2	0	0	0	0	0	0	0	6	0	0	0	0	0	0
Mycoplasma fermentans	0	2	21	0	0	0	0	0	0	0	0	0	0	0	0	0	0	0	0	0	3	0	0	14	0	0	5	0	0	0	0	0	4	0	0	0	0	0	0	0	0	0	0	0	0	0	0	0	0
Mycoplasma gallisepticum	5	7	40	9	0	0	0	0	0	0	0	0	0	0	0	0	0	0	0	0	7	0	0	6	0	0	18	0	0	12	0	0	6	0	0	0	0	0	0	0	0	0	0	0	0	0	0	0	2
Mycoplasma genitalium	3	10	43	17	0	0	0	0	0	0	0	0	0	0	0	0	0	0	0	0	10	0	0	0	0	0	14	0	0	0	0	0	3	0	0	0	0	0	0	0	0	0	0	0	0	0	0	0	3
Mycoplasma haemocanis	0	7	55	17	0	0	0	0	0	2	0	0	0	0	0	0	0	0	0	0	0	0	0	0	4	0	0	0	0	0	0	0	0	0	0	0	0	0	0	0	0	0	0	0	0	0	0	0	0
Mycoplasma haemofelis	0	0	17	4	0	0	0	0	0	0	0	0	0	0	0	0	0	0	0	0	0	0	0	0	0	3	0	0	0	0	0	0	2	0	0	0	0	0	0	0	0	0	0	0	0	0	0	0	0
Mycoplasma hominis	6	32	92	39	0	0	0	0	3	6	0	0	0	0	0	0	0	0	0	0	12	3	5	161	23	14	32	0	0	0	0	0	21	0	80	0	0	0	0	0	0	0	0	0	0	0	0	0	33
Mycoplasma hyopneumoniae	0	2	27	0	0	0	0	0	0	0	0	0	0	0	0	0	0	0	0	0	8	0	0	0	0	0	2	0	0	0	0	0	0	0	0	0	0	0	0	0	0	0	0	0	0	0	0	0	0
Mycoplasma hyorhinis	0	4	13	0	0	0	0	0	0	0	0	0	0	0	0	0	0	0	0	0	4	0	0	4	0	0	0	0	0	0	0	0	0	0	0	0	0	0	0	0	0	0	0	0	0	0	0	0	0
Mycoplasma leachii	0	0	56	4	0	0	0	0	0	0	0	0	0	0	0	0	0	0	0	0	6	0	0	0	0	0	14	0	0	0	0	0	5	0	0	0	0	0	0	0	0	0	0	0	0	0	0	0	2
Mycoplasma mobile	5	13	73	18	0	0	0	0	3	0	0	0	0	0	0	0	0	0	0	0	13	0	0	17	0	0	17	0	0	5	0	0	12	0	0	0	0	0	0	0	0	0	0	0	0	0	0	0	0
Mycoplasma mycoides	7	10	119	34	0	0	0	0	3	3	0	0	0	0	0	2	0	0	0	0	18	2	0	12	4	0	9	0	0	3	0	0	7	0	6	0	0	0	0	0	0	0	8	0	0	0	0	0	3
Mycoplasma penetrans	10	15	88	18	0	0	1	0	0	1	0	0	0	0	0	0	0	0	0	0	12	2	0	11	10	15	29	0	0	3	0	0	9	0	3	0	0	0	0	0	0	0	30	0	0	5	0	0	0
Mycoplasma pulmonis	8	15	182	50	0	0	0	0	3	0	0	0	0	0	0	0	0	0	0	0	29	0	0	17	0	0	19	0	0	0	0	0	17	0	13	2	0	0	0	0	0	0	15	0	0	0	0	0	2
Mycoplasma putrefaciens	18	13	67	12	0	0	4	0	0	2	0	0	0	0	0	0	0	0	0	0	25	0	0	10	0	0	20	2	0	5	0	0	11	0	4	0	0	0	0	0	0	0	28	0	0	2	0	0	0
Mycoplasma suis	0	0	8	0	0	0	0	0	0	0	0	0	0	0	0	0	0	0	0	0	10	0	0	0	0	0	0	0	0	0	0	0	0	0	0	0	0	0	0	0	0	0	0	0	0	0	0	0	0
Mycoplasma synoviae	3	13	104	15	0	0	0	0	0	0	0	0	0	0	0	0	0	0	0	0	18	0	0	16	9	5	30	0	0	5	0	0	13	0	3	0	0	0	0	0	0	0	4	0	0	0	0	0	0
Myxococcus fulvus	0	38	144	0	5	0	0	0	0	0	0	0	0	0	0	0	0	0	0	0	0	0	0	0	0	5	0	0	0	0	0	0	6	0	0	0	0	0	0	0	0	0	0	0	0	0	0	0	9
Myxococcus xanthus	0	44	200	18	0	0	0	0	0	0	0	0	0	0	0	0	0	4	0	0	0	0	0	0	0	4	0	0	0	0	0	0	0	0	0	0	0	0	0	0	0	0	6	0	0	0	0	0	16
Nakamurella multipartita	165	484	1491	117	59	0	0	0	28	0	0	0	0	0	0	14	0	0	0	0	9	0	0	56	20	42	226	0	0	0	0	0	25	0	0	20	0	0	9	0	0	5	8	0	0	0	0	0	198
Nanoarchaeum equitans	0	4	55	4	0	0	0	0	0	0	0	0	0	0	0	0	0	0	0	0	6	0	0	0	0	0	0	0	0	0	0	0	0	0	0	0	0	0	0	0	0	0	24	0	0	0	0	0	0
Natranaerobius thermophilus	9	13	67	9	0	0	0	0	0	0	0	0	0	1	0	1	0	0	0	0	12	0	1	5	0	2	9	0	0	0	0	0	6	0	1	0	0	0	0	0	0	0	13	0	0	0	0	0	2
Natrialba magadii	3	29	136	10	0	0	0	0	0	0	0	0	0	0	0	0	0	0	0	0	0	0	0	0	0	0	26	0	0	0	0	0	2	0	0	0	0	0	0	0	0	0	0	0	0	0	0	0	3
Natronomonas pharaonis	0	42	148	8	0	0	0	0	0	0	0	0	0	0	0	0	0	0	0	0	0	0	0	0	0	0	0	0	0	0	0	0	13	0	0	0	0	0	0	0	0	0	0	0	0	0	0	0	0
Nautilia profundicola	5	18	116	20	0	0	0	0	8	0	0	0	0	0	0	0	0	0	0	0	11	0	4	4	2	0	9	0	0	2	0	0	0	0	3	0	0	0	0	2	0	0	11	0	0	0	0	0	0
Neisseria gonorrhoeae	9	0	21	7	0	0	2	3	4	4	0	0	0	0	17	0	2	233	0	0	0	0	0	92	364	6	75	0	0	0	0	0	1152	0	61	23	0	0	0	0	0	0	0	0	0	0	0	0	2
Neisseria lactamica	26	65	181	27	0	0	2	5	14	5	0	0	0	0	9	0	5	506	0	7	0	4	0	189	605	15	129	0	0	0	0	0	2016	0	119	34	0	0	0	0	0	0	0	0	0	0	0	0	8
Neisseria meningitidis	36	76	421	41	8	0	9	6	13	11	7041	0	2	0	57	5	46	975	31	5	59	68	0	350	1453	32	242	4	6	7	0	17	4004	3	237	72	0	0	0	0	0	0	16	2	34	0	0	2	62
Neorickettsia risticii	0	0	40	3	0	0	0	0	0	0	0	0	0	0	0	0	0	0	0	0	6	0	0	0	0	0	0	0	0	0	0	0	2	0	0	0	0	0	0	0	0	0	0	0	0	0	0	0	0
Neorickettsia sennetsu	3	2	31	5	0	0	0	0	0	0	0	0	0	0	0	0	0	0	0	0	3	0	0	0	0	0	0	0	0	0	0	0	0	0	0	0	0	0	0	0	0	0	0	0	0	0	0	0	0
Niastella koreensis	5	8	34	7	0	0	0	0	1	1	0	0	0	0	0	0	0	0	0	0	10	0	2	4	3	2	3	0	0	1	0	0	3	0	1	0	0	0	0	0	0	0	2	0	0	0	0	0	2
Nitratifractor salsuginis	8	10	39	5	1	0	0	0	0	10	0	0	0	0	0	0	0	0	0	0	4	0	0	4	0	0	4	0	0	0	0	0	7	0	0	0	0	0	0	0	0	0	0	0	0	0	0	0	6
Nitratiruptor sp.	2	14	47	6	0	0	0	0	0	0	0	0	0	0	0	0	0	0	0	0	5	0	0	4	0	0	8	0	0	0	0	0	5	0	1	0	0	0	0	0	0	0	0	0	0	0	0	0	4
Nitrobacter hamburgensis	0	9	69	0	0	0	0	0	0	0	0	0	0	0	0	0	0	0	0	0	0	0	0	0	0	0	0	0	0	0	0	0	0	0	0	0	0	0	0	0	0	0	0	0	0	0	0	0	0
Nitrobacter winogradskyi	0	0	39	6	0	0	0	0	0	0	0	0	0	0	0	0	0	0	0	0	6	0	0	0	0	0	9	0	0	0	0	0	0	0	0	0	0	0	0	0	0	0	0	0	0	0	0	0	0
Nitrosococcus halophilus	0	4	0	3	0	0	0	0	0	0	0	0	0	0	0	0	0	0	0	0	5	0	0	1	1	0	5	0	0	0	0	0	3	0	0	0	0	0	0	0	0	0	1	0	0	0	0	0	1
Nitrosococcus oceani	0	3	23	0	0	0	0	0	0	0	0	0	0	0	0	0	0	0	0	0	3	0	0	0	1	0	1	0	0	0	0	0	2	0	0	0	0	0	0	0	0	0	10	0	0	0	0	0	0
Nitrosococcus watsonii	2	7	21	0	0	0	0	0	0	0	0	0	0	0	0	0	0	0	0	0	3	0	2	2	0	0	1	0	0	0	0	0	3	0	0	0	0	0	4	0	0	0	31	0	0	0	0	0	4
Nitrosomonas europaea	1	0	0	0	4	0	0	0	0	0	0	0	0	0	0	0	0	0	0	0	7	0	0	0	0	0	0	0	0	0	0	0	0	0	0	0	0	0	0	0	62	81	345	0	0	0	0	0	1
Nitrosomonas eutropha	2	5	0	3	0	0	0	0	0	0	0	0	0	0	0	0	0	0	0	0	5	0	0	0	1	0	2	0	0	0	0	0	0	0	0	3	0	0	0	0	0	0	0	0	0	0	0	0	0
Nitrosomonas sp.	3	7	29	7	5	0	0	0	0	0	0	0	0	0	0	0	0	0	0	0	8	0	0	0	0	0	7	0	0	0	0	0	7	0	1	0	0	0	0	0	0	0	0	0	0	0	0	0	1
Nitrosopumilus maritimus	3	10	30	7	0	0	0	0	0	0	0	0	0	0	0	0	0	0	0	0	3	0	0	0	0	2	5	0	0	0	0	0	12	0	0	0	0	0	0	0	0	0	6	0	0	0	0	0	0
Nitrosospira multiformis	3	6	0	3	0	0	0	0	0	0	0	0	0	0	0	0	0	0	0	0	3	0	0	0	0	0	8	0	0	0	0	0	0	0	0	0	0	0	0	0	0	0	0	0	0	0	0	0	0
Nocardia cyriacigeorgica	94	298	1086	58	26	0	0	0	10	0	0	0	0	0	0	11	0	7	0	0	6	0	0	36	5	17	99	0	0	0	0	0	9	0	14	7	0	0	6	10	0	0	0	0	0	6	0	0	127
Nocardia farcinica	126	466	1453	82	38	0	0	0	22	0	0	0	0	0	0	17	0	11	0	0	0	0	0	54	9	21	207	0	0	0	0	0	62	0	31	18	0	0	6	0	0	0	6	0	0	0	0	20	169
Nocardioides sp.	298	864	2875	131	102	0	0	6	0	6	0	0	0	0	0	36	0	24	0	0	0	0	0	38	20	79	353	0	0	6	0	0	31	0	36	46	0	0	7	5	0	0	0	0	0	24	0	0	315
Nocardiopsis dassonvillei	196	759	2436	114	59	0	10	9	38	0	0	0	0	0	0	40	0	26	0	0	13	0	6	66	13	62	352	0	0	9	0	0	32	8	21	37	0	0	15	0	0	0	10	0	0	22	0	0	242
Nostoc punctiforme	3	4	29	13	0	0	0	0	0	0	0	0	0	0	0	0	0	0	0	0	9	0	1	3	1	2	4	0	0	0	0	0	2	0	0	0	0	0	0	0	0	0	1	0	0	0	0	0	0
Nostoc sp.	1	2	23	0	0	0	0	0	0	0	0	0	0	0	0	0	0	0	0	0	0	0	1	4	2	0	3	0	0	0	0	0	1	0	0	0	0	0	0	0	0	0	0	0	0	0	0	0	0
Novosphingobium aromaticivorans	8	42	170	0	0	0	0	0	0	0	0	0	0	0	0	0	0	0	0	0	0	0	0	0	0	0	23	0	0	0	0	0	0	0	0	0	0	0	0	0	0	0	0	0	0	0	0	0	32
Novosphingobium sp.	0	0	246	0	0	0	0	0	0	0	0	0	0	0	0	0	0	0	0	0	5	0	0	0	0	0	13	0	0	0	0	0	0	0	0	0	0	0	0	0	0	0	12	0	0	13	0	0	16
Oceanimonas sp.	0	22	128	6	0	0	0	0	7	0	0	0	0	0	0	0	0	4	0	0	0	0	0	10	0	0	32	0	0	0	0	0	16	9	2	0	0	0	2	0	0	0	2	0	0	6	0	0	0
Oceanithermus profundus	0	0	386	0	0	0	0	0	0	0	0	0	0	0	0	0	0	0	0	0	0	0	0	17	0	0	0	0	0	0	0	0	0	0	0	0	0	0	0	0	0	0	0	0	0	0	0	0	61
Oceanobacillus iheyensis	9	17	70	13	1	0	2	4	8	2	3	1	0	0	1	0	2	2	0	0	27	3	2	12	6	5	53	2	1	4	0	3	12	0	7	4	1	0	2	0	0	1	7	0	1	2	0	0	4
Ochrobactrum anthropi	0	0	39	0	0	0	0	0	0	0	0	0	0	0	0	0	0	3	0	0	0	0	0	0	0	0	0	0	0	0	0	0	3	0	0	0	0	0	0	0	0	0	1	0	0	0	0	0	0
Odoribacter splanchnicus	147	169	971	0	3	0	6	1	3	16	2	4	0	5	2	3	0	3	0	3	612	7	38	151	63	17	5	1	0	5	0	7	271	0	7	0	0	0	4	0	0	4	3	0	0	0	0	3	13
Oenococcus oeni	15	24	124	15	6	0	1	0	4	10	0	0	0	0	0	0	0	3	0	0	22	7	8	8	2	9	33	4	3	2	0	0	15	0	3	0	0	0	1	0	0	0	0	0	0	2	0	0	0
Olsenella uli	399	1085	3122	163	243	44	7	0	84	11	0	0	0	12	11	8	0	5	0	0	745	3	0	195	35	67	160	0	0	0	0	0	91	0	0	0	0	0	53	36	0	20	7	0	0	23	0	0	260
Onion yellows	0	0	86	0	0	0	0	0	0	0	0	0	0	0	0	0	0	0	0	0	0	0	0	0	0	0	2	0	0	0	0	0	0	0	7	0	0	0	0	0	0	0	4	0	0	0	0	0	0
Opitutus terrae	12	25	145	3	0	0	0	0	0	1	0	0	0	0	0	0	0	0	0	0	6	0	0	7	0	0	9	0	0	0	0	0	4	0	0	0	0	0	0	0	0	0	0	0	0	0	0	0	7
Orientia tsutsugamushi	0	0	11	0	0	0	0	0	0	0	0	0	0	0	0	0	0	0	0	0	1	0	0	0	0	0	7	0	0	0	0	0	0	0	0	0	0	0	0	0	0	0	0	0	0	0	0	0	0
Oscillibacter valericigenes	21	19	102	22	1	0	0	0	0	0	0	0	0	4	0	0	0	0	0	0	21	0	0	4	0	3	2	0	0	0	0	0	12	0	0	0	0	0	1	0	0	3	0	0	0	0	0	0	9
Owenweeksia hongkongensis	6	10	54	7	0	0	0	0	0	0	0	0	0	1	0	1	0	1	0	0	9	0	2	7	0	0	0	0	0	1	0	0	6	0	2	0	0	0	0	0	0	0	0	0	0	0	0	0	3
Paenibacillus mucilaginosus	0	0	0	0	0	0	0	0	0	0	0	0	0	0	0	0	0	0	0	0	0	0	0	0	0	0	0	0	0	0	0	0	0	0	0	0	0	0	0	0	0	0	3	0	0	0	0	0	0
Paenibacillus polymyxa	11	19	89	14	1	0	1	0	4	2	0	0	0	1	0	2	0	1	0	1	21	1	2	12	3	3	24	3	1	2	0	1	12	0	2	0	0	0	1	0	0	2	4	0	0	1	0	0	3
Paenibacillus sp.	11	27	96	15	1	0	1	0	2	2	1	0	0	1	0	3	0	1	0	0	19	1	2	5	1	6	20	1	0	1	0	1	10	0	3	1	0	0	1	1	0	0	9	0	0	3	0	0	3
Paenibacillus terrae	6	13	37	9	0	0	0	0	1	2	0	0	0	0	0	0	0	1	0	0	13	0	1	2	0	1	7	0	0	0	0	0	4	0	5	0	0	0	0	0	0	0	2	0	0	1	0	0	1
Paludibacter propionicigenes	17	20	185	30	1	0	1	0	0	2	0	1	0	1	2	3	0	1	0	0	17	0	10	25	6	5	8	0	0	1	0	0	23	0	2	0	0	0	0	0	0	1	36	0	0	0	0	0	4
Pantoea ananatis	0	0	25	0	0	0	0	0	0	0	0	0	0	0	0	0	0	0	0	0	4	0	0	5	0	0	0	0	0	0	0	0	3	0	0	0	0	1	0	1	0	0	8	0	0	0	0	0	0
Pantoea sp.	0	3	0	0	0	0	0	0	0	0	0	0	0	0	0	0	0	2	1	0	5	0	0	0	2	0	0	0	0	0	0	0	0	0	0	0	0	0	0	0	0	0	5	0	0	0	2	0	0
Pantoea vagans	0	0	25	0	0	0	0	0	0	0	0	0	0	0	0	0	0	0	0	0	6	0	0	2	0	0	4	0	0	0	0	0	6	0	0	0	0	0	0	0	0	0	7	0	3	0	3	0	0
Parabacteroides distasonis	25	31	196	30	1	0	1	0	1	4	0	1	0	2	0	0	0	1	0	0	37	0	13	30	7	0	16	0	0	1	0	1	32	0	1	0	0	0	0	0	0	0	1	0	0	0	0	0	5
Parachlamydia acanthamoebae	2	4	29	3	0	0	0	0	4	0	0	0	0	0	0	0	0	0	0	0	12	0	2	8	4	3	9	5	0	0	0	0	4	0	1	0	0	0	1	0	0	0	1	0	0	0	0	0	1
Paracoccus denitrificans	2	0	223	0	0	0	0	0	0	0	0	0	0	0	0	0	0	10	0	0	13	0	0	0	0	0	31	0	0	0	0	0	0	0	0	0	0	0	0	0	0	0	0	0	0	0	0	0	8
Parvibaculum lavamentivorans	4	17	100	11	0	0	0	0	0	0	0	0	0	0	0	0	0	0	0	0	6	0	0	0	0	9	3	0	0	0	0	0	0	15	0	0	4	0	0	0	0	0	0	0	0	8	0	0	15
Parvularcula bermudensis	0	0	0	0	0	0	0	0	0	0	0	0	0	0	0	0	0	0	0	0	8	0	0	0	0	0	0	0	0	0	0	0	0	0	0	0	0	0	0	0	0	0	0	0	0	0	0	0	0
Pasteurella multocida	0	0	48	0	0	0	1	2	4	7	0	0	0	0	19	0	1	6	0	0	8	500	0	10	0	0	41	0	0	0	0	0	13	3	12	7	0	16	10	11	4	3	167	0	0	4	0	0	0
Pectobacterium atrosepticum	0	0	15	0	0	0	0	0	0	0	0	0	0	0	0	0	0	0	0	0	4	0	0	0	1	0	1	0	0	0	0	0	5	0	0	0	0	0	0	0	0	0	9	0	0	0	1	0	3
Pectobacterium carotovorum	0	6	18	0	0	0	0	0	0	1	0	0	0	0	0	0	0	0	0	0	2	0	0	0	0	0	4	0	0	0	0	0	0	0	0	0	0	0	0	0	0	0	12	0	0	0	0	0	0
Pectobacterium wasabiae	0	0	28	0	0	0	0	0	0	2	0	0	0	0	0	0	0	1	0	0	0	0	0	5	0	0	1	0	0	0	0	0	3	0	1	0	0	0	0	0	0	0	12	0	0	0	0	0	0
Pediococcus claussenii	16	26	110	22	7	0	0	2	7	4	0	0	0	2	0	0	0	4	0	0	34	0	5	19	4	14	84	2	0	3	0	4	18	0	5	0	0	0	0	0	0	2	0	0	0	7	0	0	5
Pediococcus pentosaceus	14	45	137	32	6	0	2	0	22	4	0	0	0	2	0	0	0	6	0	0	52	0	8	15	13	15	111	5	0	4	0	2	35	0	9	0	0	0	2	0	0	2	0	0	0	11	0	0	19
Pedobacter heparinus	5	6	61	6	0	0	0	0	0	0	0	0	0	0	0	0	0	0	0	0	11	0	0	7	0	0	0	0	0	0	0	0	6	0	0	0	0	0	0	0	0	0	7	0	0	0	0	0	0
Pedobacter saltans	6	10	75	13	0	0	0	0	0	3	0	0	0	4	0	0	0	0	0	0	14	0	0	7	2	0	9	0	0	1	0	0	7	0	4	0	0	0	0	0	0	0	4	0	0	1	0	0	2
Pelagibacterium halotolerans	0	0	125	0	0	0	0	0	0	0	0	0	0	10	0	0	0	0	0	0	0	0	0	0	0	0	0	0	0	0	0	0	0	0	0	0	0	0	0	0	0	0	7	0	0	0	0	0	17
Pelobacter carbinolicus	3	7	32	7	0	0	0	0	3	0	0	0	0	0	0	0	0	0	0	0	9	0	2	0	0	2	5	0	0	0	0	0	0	0	0	0	0	0	0	0	0	0	10	0	2	0	0	0	0
Pelobacter propionicus	0	0	75	0	0	0	0	0	5	0	0	0	0	0	0	0	0	0	0	0	7	0	0	0	0	0	5	0	0	0	0	0	4	0	0	0	0	0	0	0	0	0	7	0	0	0	0	0	0
Pelodictyon phaeoclathratiforme	0	0	38	0	0	0	0	0	0	1	0	0	0	0	0	0	0	0	0	0	0	0	2	0	0	0	0	0	0	4	0	0	6	0	0	0	0	0	0	0	0	0	2	0	0	0	0	0	0
Pelotomaculum thermopropionicum	8	7	74	11	0	0	0	0	0	0	0	0	0	0	0	0	0	0	0	0	14	0	0	3	0	0	0	0	0	0	0	0	4	0	0	0	0	0	0	0	0	0	10	0	0	0	0	0	0
Persephonella marina	6	12	82	13	1	0	0	0	0	0	0	0	0	0	0	0	0	0	0	0	15	0	2	4	0	0	5	0	0	0	0	0	3	0	0	0	0	0	0	0	0	0	18	0	0	0	0	0	0
Petrotoga mobilis	6	14	86	15	0	0	0	0	0	0	0	0	0	0	0	0	0	0	0	0	8	1	3	4	3	0	7	0	0	0	0	0	7	0	3	0	0	0	0	0	0	0	3	0	0	0	0	0	1
Phenylobacterium zucineum	21	131	529	22	0	0	0	0	0	0	0	0	0	0	0	0	0	11	0	0	12	0	0	0	15	11	68	0	0	0	0	0	0	0	0	0	0	0	0	0	0	0	0	0	0	0	0	0	51
Photobacterium profundum	3	6	30	0	0	0	1	0	1	0	0	0	0	0	0	0	0	0	0	0	1	0	1	0	0	1	3	0	0	0	0	0	0	0	0	0	0	0	0	0	0	0	4	0	0	0	0	0	0
Photorhabdus asymbiotica	4	6	33	5	0	0	0	0	0	1	0	0	0	0	0	0	0	0	0	0	3	0	0	0	1	1	2	0	0	0	0	0	0	0	5	0	0	0	0	0	0	0	41	0	0	0	0	0	0
Photorhabdus luminescens	2	11	35	8	0	0	2	0	0	1	0	0	0	0	0	0	0	0	0	0	11	0	0	0	0	0	8	0	0	0	0	0	0	0	0	0	0	0	0	0	0	0	35	0	0	1	0	0	0
Phycisphaera mikurensis	15	68	360	28	0	0	0	0	0	0	0	0	0	0	0	15	0	17	0	0	7	0	0	0	0	10	54	0	0	0	0	0	17	0	0	0	0	0	0	0	0	0	0	0	0	0	0	0	37
Picrophilus torridus	0	7	118	50	0	0	0	0	0	0	0	0	0	0	0	0	0	0	0	0	6	0	0	0	0	0	0	0	0	0	0	0	12	0	0	0	0	0	0	0	0	0	28	4	0	0	0	0	0
Pirellula staleyi	0	4	19	0	0	0	0	0	0	0	0	0	0	0	0	0	0	0	0	0	1	0	0	0	0	0	2	0	0	0	0	0	2	0	0	0	0	0	0	0	0	0	1	0	0	0	0	0	4
Planctomyces brasiliensis	0	4	15	2	0	0	0	0	0	0	0	0	0	0	0	0	0	0	0	0	2	0	0	3	0	0	1	0	0	0	0	0	3	0	0	0	0	0	0	0	0	0	0	0	0	0	0	0	0
Planctomyces limnophilus	2	5	14	2	0	0	0	0	1	0	0	0	0	0	0	0	0	0	0	0	2	0	0	2	0	0	3	0	0	0	0	0	3	0	1	0	0	0	0	0	0	0	0	0	0	0	0	0	0
Polaromonas naphthalenivorans	5	38	122	15	2	0	0	0	0	0	0	0	0	0	0	10	0	6	0	0	9	0	3	0	4	13	8	0	0	0	0	0	0	0	15	0	0	0	0	0	0	0	9	0	0	0	0	0	14
Polaromonas sp.	7	40	97	10	0	0	0	0	0	0	5	0	0	0	0	0	0	2	0	0	0	0	0	0	0	4	10	0	0	0	0	0	0	0	7	0	0	0	0	0	0	0	0	0	0	0	0	0	14
Polymorphum gilvum	0	48	190	16	0	0	0	0	0	0	0	0	0	0	0	0	0	0	0	0	9	0	0	0	6	17	23	0	0	0	0	0	0	0	0	0	0	0	0	0	0	0	11	0	0	0	0	0	28
Polynucleobacter necessarius	5	11	34	11	0	0	0	0	0	2	0	0	0	0	0	0	0	0	0	0	18	0	0	5	0	0	12	0	0	0	0	0	0	0	0	0	0	0	0	0	0	0	0	0	0	2	0	0	2
Porphyromonas asaccharolytica	162	179	1136	101	8	0	3	0	0	21	0	11	0	10	2	0	0	0	0	3	459	0	40	156	19	15	134	0	0	3	0	0	5921	1	8	0	0	0	2	0	0	3	0	0	0	0	0	0	22
Porphyromonas gingivalis	415	368	2420	217	26	0	3	2	0	26	0	7	0	9	7	0	0	0	0	4	1077	51	74	364	3	36	162	0	0	21	0	6	903	0	26	0	0	0	8	0	0	3	2	0	0	0	0	0	43
Prevotella denticola	6116	7128	40364	5743	269	5	139	26	158	345	66	114	7	121	53	5	2	134	2	83	12384	417	2770	14901	1583	291	42	16	0	182	0	85	11142	21	99	0	0	4	80	30	5	90	12	3	2	2	5	57	874
Prevotella melaninogenica	70842	121690	473543	75579	3157	204	804	257	443	4063	328	756	34	857	324	54	14	310	44	1922	120624	226	8827	21212	3679	10355	267	185	72	9187	9	3876	23360	287	247	57	14	24	1384	328	72	1366	44	50	18	46	41	249	55945
Prevotella ruminicola	228	265	1506	210	11	0	7	2	8	22	3	4	0	7	1	0	0	6	0	1	314	6	150	226	57	7	19	0	0	4	0	7	306	1	9	0	1	0	5	2	0	2	1	0	0	0	1	2	31
Prochlorococcus marinus	5	78	733	111	4	0	9	0	42	5	0	0	0	0	0	0	0	3	0	0	45	0	10	45	16	0	49	0	0	11	0	0	42	0	13	20	0	0	0	0	17	0	57	0	5	28	0	0	20
Propionibacterium acnes	276	374	1326	106	265	37	40	16	85	15	34	10	6	9	4	80	2	22	0	6	91	5	0	276	30	27	291	16	0	16	0	50	27	16	15	11	0	8	26	16	8	23	105	12	0	18	0	0	199
Propionibacterium freudenreichii	780	2515	8552	428	1456	14	19	22	166	14	0	0	0	44	0	149	0	46	0	8	0	13	0	337	105	194	1129	10	12	26	0	0	154	0	169	171	0	0	64	18	0	23	0	0	0	65	0	0	868
Prosthecochloris aestuarii	4	0	56	7	0	0	0	0	0	2	0	0	0	0	0	0	0	0	0	0	0	0	0	2	0	0	0	0	0	0	0	0	0	0	0	0	0	0	0	0	0	0	0	0	0	0	0	0	2
Proteus mirabilis	6	12	69	18	0	0	53	6	0	1	5	6	74	16	1	1	7	0	4	0	18	6	0	7	10	548	14	8	6	14	0	0	146	1	33	0	2	39679	29414	28974	11514	7957	638019	2	3	1	8	292	2
Pseudoalteromonas atlantica	0	0	19	5	0	0	0	0	1	0	0	0	0	0	0	0	0	0	0	0	0	0	1	2	0	0	1	0	0	0	0	0	2	0	1	0	0	0	0	0	0	0	0	0	0	2	0	0	0
Pseudoalteromonas haloplanktis	4	15	48	8	0	0	0	0	0	0	0	0	0	0	0	0	0	0	0	0	18	0	1	4	1	2	4	0	0	0	0	0	6	0	6	0	0	0	0	0	0	0	2	0	0	0	0	0	2
Pseudoalteromonas sp.	2	9	36	5	0	0	0	0	0	0	0	0	0	0	0	0	0	0	0	0	11	0	1	1	0	0	8	0	0	0	0	0	2	0	2	0	0	0	0	0	0	0	2	0	0	0	0	0	0
Pseudogulbenkiania sp.	14	0	205	8	7	8	0	0	9	0	0	0	0	0	0	0	0	15	0	0	0	0	0	20	5	5	24	0	0	0	0	0	35	6	21	0	0	0	0	0	0	0	31	0	0	0	0	0	14
Pseudomonas aeruginosa	38	89	353	65	44	494	167	53	150	9	102533	115273	60055	43900	81	84	17	92	20	889	58	21	734	474407	93	5076	254	519351	744993	354357	51	59	161	224455	97579	173998	103635	101937	322349	303111	97973	135964	499226	178581	22595	61	67	20784	109
Pseudomonas brassicacearum	0	0	46	3	3	0	0	0	0	0	12	0	2	0	0	0	0	0	0	0	2	0	0	9	0	0	5	7	9	7	0	0	2	15	7	8	13	2	3	3	0	5	10	9	0	0	0	0	4
Pseudomonas entomophila	0	0	119	0	3	5	0	0	0	0	11	120	80	48	0	0	0	7	0	0	5	0	0	48	0	3	26	37	46	26	0	0	13	40	15	18	6	9	25	27	14	12	53	20	3	0	0	4	10
Pseudomonas fluorescens	8	55	346	21	28	9	9	2	13	0	21	17	15	8	1	10	6	13	0	1	14	0	3	92	10	10	35	53	69	44	0	21	44	97	25	40	22	21	61	71	96	159	612	25	4	0	0	12	39
Pseudomonas fulva	0	29	114	0	0	0	0	0	0	0	178	6	3	0	0	0	2	9	0	0	3	0	0	45	2	0	19	31	62	28	0	0	12	40	9	4	0	4	17	25	16	25	80	13	5	0	0	0	18
Pseudomonas mendocina	0	0	243	0	0	0	0	0	11	0	743	21	10	18	0	0	0	6	0	0	8	0	0	171	7	23	37	190	231	139	0	0	26	236	218	340	132	37	130	99	47	61	234	58	29	0	0	251	20
Pseudomonas putida	0	0	256	0	21	13	0	0	7	0	190	25	25	14	0	7	6	17	0	4	9	0	2	81	6	16	46	201	268	147	0	1	74	431	337	567	248	36	140	128	11	31	75	249	9	0	0	86	18
Pseudomonas stutzeri	0	0	134	11	0	0	0	0	0	0	1018	89	75	38	0	0	0	0	0	0	5	0	0	40	2	23	23	58	63	33	0	0	4	624	326	609	345	8	47	62	27	41	154	424	4	0	0	39	9
Pseudomonas syringae	0	0	102	7	1	0	0	0	1	0	54	2	0	0	0	0	0	4	0	0	8	0	2	19	0	3	12	16	28	14	0	0	10	24	9	16	8	3	12	4	3	7	22	6	1	0	0	4	10
Pseudonocardia dioxanivorans	108	305	1113	62	50	0	0	6	27	0	0	0	0	0	0	9	0	11	0	0	0	0	0	23	13	36	198	0	0	9	0	0	11	6	16	21	0	0	0	0	0	0	8	0	0	15	0	0	166
Pseudovibrio sp.	3	6	31	5	0	0	0	0	0	0	0	0	0	0	0	0	0	0	0	0	5	0	0	3	0	0	4	0	0	0	0	0	6	0	0	0	0	0	0	0	0	0	0	0	1	0	0	0	0
Pseudoxanthomonas spadix	0	57	203	0	0	0	0	0	0	0	0	0	0	0	0	0	0	0	0	0	0	0	0	0	0	0	43	0	0	0	0	0	0	0	62	0	0	0	0	0	0	0	0	0	0	0	0	0	11
Pseudoxanthomonas suwonensis	32	122	337	30	0	0	0	0	0	0	0	0	0	0	0	42	103	174	0	0	22	0	0	19	0	0	73	0	0	0	0	0	338	0	0	10	0	0	15	0	0	5	33	0	30	0	0	0	50
Psychrobacter arcticus	0	0	0	0	0	0	0	0	0	0	0	0	0	3	0	0	0	0	0	0	14	0	0	0	0	0	3	0	0	0	0	0	0	0	0	0	0	0	0	0	0	0	0	0	0	0	0	0	4
Psychrobacter cryohalolentis	0	0	48	0	0	0	0	0	0	1	0	0	0	0	0	0	0	0	0	0	0	0	2	0	0	0	0	0	0	0	0	0	0	0	0	0	0	0	0	0	0	0	0	0	0	0	0	0	4
Psychrobacter sp.	0	0	0	0	0	0	0	0	0	0	0	0	0	0	0	0	0	0	0	0	11	0	0	0	0	0	0	0	0	0	0	0	0	0	0	0	0	0	0	0	0	0	0	0	0	0	0	0	0
Psychromonas ingrahamii	0	6	45	6	0	0	0	0	0	0	0	0	0	0	0	0	0	0	0	0	6	0	1	6	1	0	5	0	0	0	0	0	4	0	0	11	0	0	1	0	0	0	6	0	0	1	0	0	0
Pusillimonas sp.	3	7	32	5	0	0	0	0	0	0	6	0	0	0	0	0	0	2	0	0	3	0	0	0	2	0	0	19	20	0	0	0	0	0	0	0	0	0	0	0	0	0	27	0	5	0	0	0	4
Pyrobaculum aerophilum	0	0	31	0	0	0	0	0	0	0	0	0	0	0	0	0	0	0	0	0	0	0	0	7	0	0	0	0	0	0	0	0	0	0	0	0	0	0	0	0	0	0	0	0	0	0	0	0	0
Pyrobaculum arsenaticum	0	0	14	0	0	0	0	0	0	0	0	0	0	0	0	0	0	0	0	0	0	0	0	0	0	0	0	0	0	0	0	0	0	0	0	0	0	0	0	0	0	0	0	0	0	0	0	0	0
Pyrobaculum calidifontis	0	0	31	0	0	0	0	0	0	0	0	0	0	0	0	0	0	0	0	0	8	0	0	0	0	0	0	0	0	0	0	0	0	0	0	0	0	0	0	0	0	0	0	0	0	0	0	0	0
Pyrobaculum islandicum	0	0	8	0	0	0	0	0	0	0	0	0	0	0	0	0	0	0	0	0	0	0	0	0	0	0	0	0	0	0	0	0	0	0	0	0	0	0	0	0	0	0	0	0	0	0	0	0	0
Pyrobaculum oguniense	0	0	8	0	0	0	0	0	0	0	0	0	0	0	0	0	0	0	0	0	0	0	0	0	0	0	0	0	0	0	0	0	2	0	0	0	0	0	0	0	0	0	0	0	0	0	0	0	0
Pyrobaculum sp.	0	12	17	0	0	0	0	0	0	0	0	0	0	0	0	0	0	0	0	0	0	0	0	0	0	4	0	0	0	0	0	0	0	0	0	0	0	0	0	0	0	0	0	0	0	0	0	0	0
Pyrococcus abyssi	2	5	15	6	0	0	0	0	0	0	0	0	0	0	0	0	0	0	0	0	3	0	0	0	0	0	7	0	0	0	0	0	2	0	0	0	0	0	0	0	0	0	0	0	0	0	0	0	0
Pyrococcus furiosus	2	5	19	8	0	0	0	0	0	4	0	0	0	0	0	0	0	0	0	0	5	0	0	2	0	0	9	0	0	2	0	0	3	0	0	0	0	0	0	0	0	0	0	0	0	0	0	0	2
Pyrococcus horikoshii	0	0	13	5	0	0	0	0	0	0	0	0	0	0	0	0	0	0	0	0	3	0	0	2	0	0	0	0	0	0	0	0	0	0	0	0	0	0	0	0	0	0	0	0	0	0	0	0	0
Pyrococcus sp.	0	6	12	3	0	0	0	0	0	0	0	0	0	0	0	0	0	0	0	0	0	0	0	0	0	2	8	0	0	0	0	0	0	0	0	0	0	0	0	0	0	0	0	0	0	0	0	0	0
Pyrococcus yayanosii	0	0	7	0	0	0	0	0	0	0	0	0	0	0	0	0	0	0	0	0	0	0	0	0	0	0	0	0	0	0	0	0	0	0	0	0	0	0	0	0	0	0	0	0	0	0	0	0	0
Pyrolobus fumarii	0	0	6	0	0	0	0	0	0	0	0	0	0	0	0	0	0	0	0	0	0	0	0	0	0	0	0	0	0	0	0	0	0	0	0	0	0	0	0	0	0	0	0	0	0	0	0	0	0
Rahnella aquatilis	0	0	0	0	0	0	0	0	0	0	0	0	0	0	0	0	0	0	0	0	2	0	0	0	1	0	1	0	0	0	0	0	0	0	0	0	0	0	0	0	0	0	8	0	0	0	0	0	0
Rahnella sp.	0	0	38	0	0	0	0	0	0	0	0	0	0	0	0	0	0	0	0	0	2	0	0	0	0	0	2	0	0	0	0	0	0	0	0	0	0	0	0	0	0	0	2	0	0	0	0	0	0
Ralstonia eutropha	9	41	177	3	43	23	0	0	0	0	0	0	0	0	0	0	0	2	0	0	5	0	0	0	2	6	24	0	0	0	0	0	17	0	20	0	0	0	0	0	0	0	24	0	0	0	0	0	7
Ralstonia pickettii	0	21	131	4	0	0	0	0	0	0	194	0	2	0	0	0	0	5	0	4	2	0	4	0	1	10	15	0	0	0	0	0	108	64	80	113	53	0	0	0	0	0	0	0	0	0	0	0	0
Ralstonia solanacearum	28	70	369	0	63	24	0	0	0	0	0	12	15	7	0	0	0	33	0	0	13	0	0	0	7	13	39	15	10	0	0	0	20	0	118	0	0	0	0	0	0	0	36	0	0	0	0	0	44
Ramlibacter tataouinensis	27	85	367	23	0	0	0	0	0	0	0	0	0	0	0	0	0	12	0	0	0	0	0	0	0	12	35	0	0	0	0	0	0	0	29	0	0	0	0	0	0	0	0	0	0	0	0	0	20
Renibacterium salmoninarum	22	71	248	15	7	0	0	0	8	0	0	0	0	0	0	2	0	3	0	0	4	0	0	17	6	2	24	3	0	0	0	0	7	0	0	0	0	0	2	2	0	0	0	0	0	6	0	0	51
Rhizobium etli	0	17	139	0	0	0	0	0	0	0	0	0	0	0	0	0	0	0	0	0	0	0	0	0	0	0	17	0	0	0	0	0	0	0	0	0	0	0	0	0	0	0	0	0	0	0	0	0	19
Rhizobium leguminosarum	0	20	156	0	0	0	0	0	5	0	0	0	0	0	0	0	0	0	0	0	0	0	0	0	0	0	0	0	0	0	0	0	0	0	0	0	0	0	0	0	0	0	0	0	0	0	0	0	34
Rhodobacter capsulatus	0	44	157	14	0	0	0	0	0	0	0	0	0	0	0	0	0	0	0	0	14	0	0	0	0	0	11	0	0	0	0	0	30	0	0	0	0	0	0	0	0	0	11	0	0	0	0	0	0
Rhodobacter sphaeroides	0	0	303	0	0	0	0	0	0	0	0	0	0	0	0	0	0	0	0	0	0	0	0	0	0	0	0	0	0	0	0	0	0	0	0	0	0	0	0	0	0	0	0	0	0	0	0	0	0
Rhodococcus equi	135	473	1479	81	33	0	0	0	16	0	0	0	0	7	0	0	0	17	0	0	3	0	0	56	0	28	137	0	0	0	0	0	14	0	23	17	0	0	9	0	0	4	0	0	0	0	0	0	163
Rhodococcus erythropolis	38	149	478	17	11	0	0	1	8	1	0	0	0	0	0	4	0	0	0	0	5	0	0	22	4	9	32	0	0	10	0	0	9	0	7	11	0	0	2	0	0	1	0	0	0	12	0	0	50
Rhodococcus jostii	47	171	648	31	17	0	0	0	13	0	0	0	0	0	0	5	0	0	0	0	6	0	0	13	0	12	71	8	0	0	0	0	9	0	0	8	0	0	4	7	0	0	8	0	0	0	0	0	86
Rhodococcus opacus	65	174	614	31	15	0	0	0	8	0	0	0	0	0	0	6	0	9	0	0	0	0	0	21	4	15	62	0	0	0	0	0	13	0	7	5	0	0	0	7	0	0	8	0	0	0	0	0	60
Rhodoferax ferrireducens	4	27	74	6	0	0	0	0	4	0	0	0	0	0	0	0	0	0	0	0	0	0	0	0	0	0	9	0	0	0	0	0	0	0	5	0	0	0	0	0	0	0	0	0	0	0	0	0	6
Rhodomicrobium vannielii	0	0	77	0	0	0	0	0	0	0	0	0	0	0	0	0	0	0	0	0	3	0	0	0	0	0	0	0	0	0	0	0	16	0	0	0	0	0	0	0	0	0	7	0	0	0	0	0	0
Rhodopirellula baltica	2	5	24	2	0	0	0	0	0	0	0	0	0	0	0	0	0	1	0	0	3	0	0	2	1	1	2	0	0	0	0	0	1	0	0	0	0	0	0	0	0	0	0	0	0	0	0	0	1
Rhodopseudomonas palustris	0	96	632	0	0	0	0	0	0	7	0	6	2	0	0	9	5	37	0	0	17	0	4	0	4	5	79	0	0	0	0	0	0	0	0	0	0	0	0	0	0	0	26	0	0	0	0	0	35
Rhodospirillum centenum	26	81	387	18	0	0	0	0	0	0	0	0	0	0	0	0	0	12	0	0	18	0	0	14	0	12	33	0	0	0	0	0	15	0	0	0	0	0	0	0	0	0	20	0	0	0	0	0	51
Rhodospirillum rubrum	0	50	223	0	0	0	0	0	0	0	0	0	0	6	0	0	0	0	0	0	6	0	0	0	10	10	27	0	0	0	0	0	8	0	0	0	0	0	0	0	0	0	8	0	0	5	0	0	11
Rhodothermus marinus	0	33	274	2	0	0	0	0	0	0	0	0	0	0	0	0	0	0	0	0	0	0	0	12	0	0	67	0	0	0	0	0	3	0	0	0	0	0	0	0	0	0	0	0	0	0	0	0	25
Rickettsia africae	0	0	5	2	0	0	0	0	0	0	0	0	0	0	0	0	0	0	0	0	0	0	0	0	0	0	0	0	0	0	0	0	0	0	0	0	0	0	0	0	0	0	0	0	0	0	0	0	0
Rickettsia akari	0	4	23	2	0	0	0	0	0	0	0	0	0	0	0	0	0	0	0	0	3	0	0	0	0	0	0	0	0	0	0	0	0	0	0	0	0	0	0	0	0	0	0	0	0	0	0	0	0
Rickettsia australis	0	0	15	4	0	0	0	0	0	0	0	0	0	0	0	0	0	0	0	0	0	0	0	0	0	0	10	0	0	0	0	0	0	0	0	0	0	0	0	0	0	0	0	0	0	0	0	0	0
Rickettsia bellii	0	0	4	0	0	0	0	0	0	0	0	0	0	0	0	0	0	0	0	0	4	0	0	0	0	0	0	0	0	0	0	0	0	0	0	0	0	0	0	0	0	0	0	0	0	0	0	0	0
Rickettsia canadensis	0	0	26	5	0	0	0	0	0	0	0	0	0	0	0	0	0	0	0	0	3	0	0	0	0	0	3	0	0	0	0	0	0	0	0	0	0	0	0	0	0	0	0	0	0	0	0	0	0
Rickettsia conorii	0	0	17	0	0	0	0	0	0	0	0	0	0	0	0	0	0	0	0	0	0	0	0	0	0	0	0	0	0	0	0	0	0	0	0	0	0	0	0	0	0	0	0	0	0	0	0	0	0
Rickettsia felis	0	0	21	3	0	0	0	0	0	0	0	0	0	0	0	0	0	0	0	0	3	0	0	0	0	0	3	0	0	0	0	0	0	0	0	0	0	0	0	0	0	0	0	0	0	0	0	0	2
Rickettsia japonica	0	0	3	0	0	0	0	0	0	0	0	0	0	0	0	0	0	0	0	0	0	0	0	0	0	0	0	0	0	0	0	0	0	0	0	0	0	0	0	0	0	0	0	0	0	0	0	0	0
Rickettsia massiliae	0	0	5	0	0	0	0	0	0	0	0	0	0	0	0	0	0	0	0	0	0	0	0	0	0	0	0	0	0	0	0	0	0	0	0	0	0	0	0	0	0	0	0	0	0	0	0	0	0
Rickettsia montanensis	0	24	50	2	0	0	0	0	0	0	0	0	0	0	0	0	0	0	0	0	0	0	0	0	0	0	0	0	0	0	0	0	0	0	0	0	0	0	0	0	0	0	0	0	0	0	0	0	0
Rickettsia philipii	0	0	3	0	0	0	0	0	0	0	0	0	0	0	0	0	0	0	0	0	0	0	0	0	0	0	0	0	0	0	0	0	0	0	0	0	0	0	0	0	0	0	0	0	0	0	0	0	0
Rickettsia rhipicephali	0	0	2	0	0	0	0	0	0	0	0	0	0	0	0	0	0	0	0	0	0	0	0	5	0	0	0	0	0	0	0	0	0	0	0	0	0	0	0	0	0	0	0	0	0	0	0	0	0
Riemerella anatipestifer	4	1	6	3	0	0	0	0	0	0	0	0	0	0	0	0	0	2	0	0	1	0	0	1	0	0	0	0	0	0	0	0	0	0	0	0	0	0	0	0	0	0	0	0	0	0	0	0	18
Robiginitalea biformata	0	0	55	0	0	0	0	0	0	0	0	0	0	0	0	0	0	0	0	0	0	0	3	0	0	0	4	0	0	0	0	0	8	0	1	0	0	0	0	0	0	0	0	0	0	0	0	0	6
Roseburia hominis	104	70	1757	120	4	0	1	0	4	10	0	4	0	1	0	0	0	0	0	2	116	0	4	32	4	17	7	3	0	4	0	1	74	0	3	1	0	0	6	2	0	3	2	0	0	0	0	1	11
Roseiflexus castenholzii	4	11	58	3	0	0	0	0	0	0	0	0	0	0	0	0	0	0	0	0	5	0	0	6	0	4	0	0	0	0	0	0	3	0	0	0	0	0	0	0	0	0	0	0	0	0	0	0	0
Roseiflexus sp.	0	17	44	3	0	0	0	0	0	0	0	0	0	0	0	0	0	0	0	0	4	0	0	3	1	0	0	0	0	0	0	0	2	0	0	0	0	0	0	0	0	0	0	0	0	0	0	0	8
Roseobacter denitrificans	4	2	27	3	0	0	0	0	0	0	0	0	0	0	0	0	0	0	0	0	4	0	0	0	0	0	0	0	0	0	0	0	0	0	0	0	0	0	0	0	0	0	0	0	0	0	0	0	4
Roseobacter litoralis	5	12	28	5	0	0	0	0	0	0	0	0	0	0	0	0	0	0	0	0	2	0	0	0	0	0	0	0	0	0	0	0	0	0	0	0	0	0	0	0	0	0	0	0	0	0	0	0	0
Rothia dentocariosa	26516	35613	173871	51527	35268	6105	4128	411	3841	174	51	5	4	10	63	155	18792	53197	87	640	33	2208	73	417	242	27389	32323	66	23	45	2	16	3035	274	2675	820	32	89	3310	852	79	427	411	274	20	160	258	235	397708
Rothia mucilaginosa	211245	541833	2034429	107570	45413	1209	5571	6472	60620	7989	143	521	180	2459	808	14418	1974	40701	170	4735	596	8802	108	24806	75983	48807	623987	62494	15426	30537	30	52	11920	794	4520	3181	57	5445	3042	927	277	1166	713	1473	594	101223	376	408	493057
Rubrivivax gelatinosus	25	102	318	31	0	0	0	0	0	0	0	0	0	0	0	0	0	12	0	0	0	0	0	0	5	26	36	0	0	0	0	0	23	0	0	0	0	0	0	0	0	0	0	0	0	0	0	0	42
Rubrobacter xylanophilus	40	152	588	28	12	0	0	0	0	0	0	0	0	0	0	0	0	0	0	0	32	0	0	13	0	0	53	0	0	0	0	0	21	0	18	0	0	0	0	0	0	0	15	0	0	0	0	0	74
Ruegeria pomeroyi	0	42	110	15	0	0	0	0	0	0	0	0	0	0	0	0	0	0	0	0	5	0	0	0	0	0	16	0	0	0	0	0	0	0	0	0	0	0	0	0	0	0	0	0	0	0	0	0	6
Ruegeria sp.	3	21	91	11	0	0	0	0	0	0	0	0	0	0	0	0	0	0	0	0	8	0	0	0	0	5	4	0	0	0	0	0	0	0	0	0	0	0	0	0	0	0	0	0	0	0	0	0	6
Ruminococcus albus	16	33	356	35	1	0	1	0	1	2	0	0	0	0	0	0	0	3	0	0	31	0	0	9	2	3	4	0	0	1	0	0	20	0	1	0	0	0	2	0	0	1	0	0	0	0	0	0	4
Runella slithyformis	4	5	40	6	0	0	0	0	2	1	0	0	0	0	0	0	0	0	0	1	6	0	2	5	1	2	3	0	0	0	0	0	4	0	0	0	0	0	0	0	0	0	0	0	0	0	0	0	3
Saccharomonospora viridis	121	342	1296	72	31	0	6	0	23	0	0	0	0	6	0	4	0	0	0	0	0	0	0	28	5	15	68	0	0	0	0	0	15	0	4	10	0	0	8	0	0	0	8	0	0	18	0	0	142
Saccharophagus degradans	0	0	38	7	0	0	0	0	6	0	0	0	0	0	0	1	0	0	0	0	8	0	0	2	1	0	0	0	0	0	0	0	5	0	0	0	0	0	1	0	0	0	0	0	0	0	0	0	0
Saccharopolyspora erythraea	93	319	1080	67	35	0	0	0	18	3	0	0	0	5	0	23	0	11	0	5	7	8	0	37	3	38	144	6	0	0	0	0	19	5	26	38	0	0	11	0	0	0	14	0	0	0	0	0	143
Salinispora arenicola	34	134	571	12	9	0	0	0	12	0	0	0	0	0	0	0	0	0	0	0	17	0	0	9	0	19	39	0	0	0	0	0	8	0	0	0	0	0	0	0	0	0	0	0	0	7	0	0	53
Salinispora tropica	39	161	529	27	12	0	0	0	11	0	0	0	0	0	0	10	0	8	0	0	13	0	0	14	0	12	56	0	0	0	0	0	0	0	0	0	0	0	1	0	0	0	0	0	0	6	0	0	33
Salmonella bongori	0	0	17	0	0	0	0	0	0	1	0	0	0	0	0	0	0	0	0	0	16	0	0	2	0	3	4	0	0	0	0	0	2	0	0	0	0	0	0	0	0	0	12	0	0	0	1	0	0
Salmonella enterica	0	0	47	0	0	0	0	0	0	0	0	0	0	0	0	0	0	0	0	0	4	2	1	4	0	0	7	0	1	1	0	0	8	4	2	2	2	17	17	13	8	9	369	0	0	0	49	3	0
Sanguibacter keddieii	1047	3177	11697	459	248	10	39	17	108	19	0	12	0	19	0	109	8	60	0	0	0	12	0	202	47	244	1594	0	0	18	0	0	80	0	129	171	0	0	56	26	0	13	21	8	0	60	0	0	1261
Saprospira grandis	2	0	42	4	0	0	0	0	0	1	0	0	0	0	0	0	0	0	0	0	6	0	1	2	0	1	3	0	0	0	0	0	8	0	0	0	0	0	0	0	0	0	2	0	0	1	0	0	2
Sebaldella termitidis	205	42	346	170	0	0	5	1	2	3	0	0	0	4	1	0	0	0	0	0	143	0	2	24	8	21	16	6	0	4	0	0	68	0	9	0	0	0	0	4	0	1	32	0	4	1	0	0	4
Segniliparus rotundus	112	320	985	50	0	0	0	0	16	0	0	0	0	0	0	0	0	0	0	0	0	0	0	35	14	10	87	0	0	0	0	0	7	0	0	0	0	0	10	0	0	0	0	0	0	0	0	0	107
Selenomonas ruminantium	59	48	257	50	1	0	3	0	3	5	0	0	0	0	0	0	0	0	0	0	280	3	3	25	4	6	34	0	0	2	0	3	27	0	4	1	0	0	3	0	0	1	0	0	0	0	0	0	8
Selenomonas sputigena	110	72	470	63	4	0	0	5	8	11	0	2	0	11	0	2	0	0	0	0	1010	26	0	212	9	583	10	0	0	0	0	3	162	0	26	0	0	0	0	0	0	0	0	0	0	0	9	0	0
Serratia proteamaculans	8	11	46	0	16	0	2	3	0	0	2	1	1	1	0	5	0	0	0	0	2	0	0	0	3	1	0	0	0	0	0	8	0	0	0	0	0	4	0	0	0	0	47	0	0	3	0	0	17
Serratia sp.	0	0	0	0	5	0	0	0	0	0	0	0	0	0	0	0	0	0	0	0	0	0	0	0	0	0	0	0	0	0	0	0	0	0	0	0	0	2	0	0	0	0	6	0	0	0	0	0	0
Serratia symbiotica	4	10	173	22	0	0	6	0	0	0	0	0	0	0	0	0	0	0	0	0	20	0	0	0	0	0	10	0	0	0	0	0	0	0	0	0	0	0	0	0	0	0	0	0	0	0	0	0	10
Shewanella amazonensis	0	0	40	0	0	0	0	0	0	0	0	0	0	0	0	0	0	0	0	0	5	0	0	3	1	0	3	0	0	0	0	0	3	0	1	0	0	0	1	0	0	0	2	0	0	0	0	0	2
Shewanella baltica	0	7	14	8	0	0	0	0	0	0	0	0	0	0	0	0	0	1	0	0	0	0	1	2	1	0	4	0	0	0	0	0	2	0	0	0	0	3	2	1	1	1	39	0	0	0	0	0	0
Shewanella denitrificans	0	4	24	3	0	0	0	0	0	0	0	0	0	0	0	0	0	0	0	0	4	0	1	2	0	0	3	0	0	0	0	0	3	0	0	0	0	0	0	0	0	0	1	0	0	0	1	0	1
Shewanella frigidimarina	0	8	27	7	0	0	0	0	0	0	0	0	0	0	0	0	0	0	0	0	7	1	1	9	0	0	2	1	1	3	0	1	3	0	1	0	0	0	0	0	0	0	3	0	0	0	0	0	5
Shewanella halifaxensis	0	5	23	3	0	0	0	0	1	0	0	0	0	0	0	0	0	0	0	0	0	0	1	1	0	0	2	0	0	1	0	0	2	0	1	0	0	0	0	0	0	0	2	0	0	0	0	0	0
Shewanella loihica	0	5	20	2	1	0	0	0	0	1	0	0	0	0	0	0	0	0	0	0	5	0	0	4	2	3	0	0	0	0	0	0	3	0	0	0	0	0	0	1	0	0	5	0	0	0	0	0	2
Shewanella oneidensis	0	3	18	4	0	0	0	0	1	1	0	0	0	0	0	0	0	0	0	0	6	0	0	3	1	0	1	0	0	0	0	0	4	0	1	0	0	0	0	0	0	0	0	0	0	0	0	0	0
Shewanella pealeana	0	4	17	2	0	0	0	0	0	1	0	0	0	0	0	0	0	1	0	0	2	0	1	4	1	1	3	0	0	0	0	0	2	0	0	0	0	0	0	0	0	0	1	0	0	0	0	0	0
Shewanella piezotolerans	0	6	23	4	0	0	0	0	0	1	0	0	0	0	0	0	0	0	0	0	6	0	1	1	1	1	2	0	0	0	0	0	1	0	1	0	0	0	0	0	0	0	3	0	0	1	0	0	0
Shewanella putrefaciens	0	0	5	1	0	0	0	0	0	0	0	0	0	0	0	0	0	0	0	0	1	0	0	0	0	4	3	0	0	0	0	0	0	0	0	0	0	0	0	0	0	0	12	0	0	0	0	0	0
Shewanella sediminis	0	2	21	3	0	0	0	0	0	0	0	0	0	0	0	0	0	0	0	0	7	0	1	0	1	0	1	0	0	0	0	1	0	0	0	0	0	0	0	0	0	0	3	0	0	1	0	0	1
Shewanella sp.	0	7	44	3	0	0	0	0	0	1	1	0	1	1	0	0	0	1	0	0	4	0	1	2	1	0	5	0	0	3	0	1	6	10	8	14	12	276	223	212	70	54	3836	2	0	0	0	1	0
Shewanella violacea	2	4	19	6	0	0	0	0	1	1	0	0	0	0	0	0	0	0	0	0	0	0	1	1	1	0	3	0	0	0	0	0	2	0	2	0	0	0	0	0	0	0	1	0	0	0	0	0	0
Shewanella woodyi	0	3	22	5	1	0	0	0	0	0	0	0	0	0	0	0	0	0	0	0	5	0	1	0	1	1	1	0	0	0	0	0	2	0	0	0	0	0	0	0	0	0	5	0	0	0	0	0	0
Shigella boydii	0	0	0	0	0	0	0	0	0	0	0	0	0	0	0	0	0	0	0	0	0	0	0	0	0	0	0	0	0	0	0	0	0	0	0	0	0	2	1	1	1	0	21	0	0	0	14	0	0
Shigella dysenteriae	0	1	3	0	0	0	0	0	0	0	0	0	0	0	0	0	0	0	0	0	0	0	0	0	0	0	0	0	0	0	0	0	0	0	0	0	0	0	1	1	0	0	8	0	0	0	13	0	0
Shigella flexneri	0	0	0	0	0	0	0	0	0	0	0	0	0	0	0	0	0	0	0	0	0	0	0	0	0	0	0	0	0	0	0	0	0	0	0	0	0	0	0	0	0	0	9	0	0	0	12	0	3
Shigella sonnei	0	0	0	0	0	0	0	0	0	0	0	0	0	0	0	0	0	0	0	0	0	0	0	0	0	2	0	0	0	0	0	0	0	0	1	0	0	218	174	165	55	43	2869	0	0	0	66	1	0
Sideroxydans lithotrophicus	4	17	63	9	2	0	0	0	0	0	0	0	0	0	0	0	0	0	0	0	0	0	0	0	5	0	9	0	0	0	0	0	0	0	4	0	0	0	0	0	0	0	7	0	0	0	0	0	0
Simkania negevensis	2	12	44	8	0	0	0	0	0	0	0	0	0	0	0	0	0	0	0	0	6	0	0	7	0	0	0	0	0	0	0	0	2	0	5	0	0	0	0	0	0	0	2	0	0	0	0	0	0
Sinorhizobium fredii	0	0	181	0	0	0	0	0	0	0	0	0	0	0	0	0	0	0	0	0	0	0	0	0	0	0	9	0	0	0	0	0	0	0	0	0	0	0	0	0	0	0	0	0	0	0	0	0	6
Sinorhizobium medicae	0	0	93	0	0	0	0	0	0	0	0	0	0	0	0	0	0	0	0	0	0	0	0	0	0	0	0	0	0	0	0	0	13	0	0	0	0	0	0	0	0	0	0	0	0	0	0	0	10
Sinorhizobium meliloti	0	13	80	0	0	0	0	0	0	0	0	0	0	0	0	0	0	0	0	0	0	0	0	0	0	0	5	0	0	0	0	0	0	0	0	0	0	0	0	0	0	0	0	0	0	0	0	0	0
Slackia heliotrinireducens	57	185	608	45	18	0	0	0	12	3	0	0	0	0	0	9	0	0	0	0	22	0	3	27	7	9	0	0	0	0	0	0	0	0	0	0	0	0	13	0	0	0	0	0	0	0	0	0	95
Sodalis glossinidius	0	0	48	0	0	0	0	0	0	0	0	0	0	0	0	0	0	1	0	0	9	0	0	0	0	0	3	0	0	0	0	0	0	0	0	0	0	0	0	0	0	0	21	0	0	0	0	0	0
Sorangium cellulosum	0	84	277	0	6	0	0	0	0	0	0	0	0	4	0	0	0	0	0	0	10	0	0	0	7	0	19	0	0	2	0	0	12	0	0	0	0	0	0	0	0	0	3	0	0	4	0	0	26
Sphaerobacter thermophilus	0	25	257	0	11	0	0	0	0	0	0	0	0	0	0	0	0	0	0	0	0	0	0	14	0	0	52	0	0	0	0	0	0	0	0	9	0	0	0	0	0	0	6	0	0	0	0	0	50
Sphaerochaeta pleomorpha	3	10	47	5	1	0	0	0	0	0	0	0	0	0	0	0	0	0	0	0	8	0	1	0	0	1	7	0	0	0	0	0	6	0	2	0	0	0	0	0	0	0	1	0	0	0	0	0	2
Sphingobacterium sp.	0	6	55	7	0	0	0	0	0	0	0	0	0	0	0	0	0	0	0	0	0	0	5	6	3	7	2	2	0	0	0	0	4	0	0	0	0	0	0	0	0	0	4	0	0	0	0	0	0
Sphingobium chlorophenolicum	0	31	100	0	0	0	0	0	0	0	0	0	0	0	0	0	0	0	0	0	4	0	0	0	0	0	11	0	0	0	0	0	0	0	0	0	0	0	0	0	0	0	0	0	0	0	0	0	0
Sphingobium japonicum	8	46	89	6	0	0	0	0	0	0	0	0	0	0	0	0	0	0	0	0	5	0	0	6	0	12	20	0	0	0	0	0	0	0	0	0	0	0	0	0	0	0	6	0	0	0	0	0	8
Sphingobium sp.	10	37	105	0	0	0	0	0	0	0	0	0	0	0	0	4	0	0	0	0	11	0	0	0	0	0	7	0	0	0	0	0	0	0	0	0	0	0	0	0	0	0	12	0	0	0	0	0	9
Sphingomonas wittichii	0	59	207	20	0	0	0	0	0	0	0	0	0	0	0	0	0	0	0	0	11	0	0	0	0	0	23	0	0	0	0	0	0	0	0	0	0	0	0	0	0	0	0	0	0	0	0	0	16
Sphingopyxis alaskensis	7	38	184	15	0	0	0	0	0	0	0	0	0	0	0	0	0	0	0	0	5	0	0	0	0	0	0	0	0	0	0	0	0	0	0	0	0	0	0	0	0	0	0	0	0	0	0	0	22
Spirochaeta africana	0	0	64	9	0	0	0	0	0	0	0	0	0	0	0	0	0	0	0	0	0	0	0	3	0	0	5	0	0	0	0	0	6	0	0	5	0	0	0	0	0	0	3	0	0	0	0	0	4
Spirochaeta caldaria	5	27	54	8	0	0	0	0	4	0	0	0	0	0	0	0	0	0	0	0	15	0	0	6	0	1	8	0	0	0	0	0	12	0	0	0	0	0	0	0	0	0	0	0	0	0	0	0	2
Spirochaeta coccoides	5	7	42	12	0	0	0	0	0	0	0	0	0	0	0	0	0	0	0	0	15	0	3	3	1	0	5	0	0	0	0	0	8	0	0	4	0	0	0	0	0	0	0	0	0	0	0	0	2
Spirochaeta smaragdinae	0	3	29	0	0	0	0	0	0	0	0	0	0	0	0	0	0	0	0	0	8	0	1	0	0	0	6	0	0	0	0	0	0	0	0	0	0	0	0	0	0	0	0	0	0	0	0	0	1
Spirochaeta sp.	6	9	49	7	0	0	0	0	0	0	0	0	0	0	0	0	0	0	0	0	10	0	0	0	0	0	3	0	0	0	0	0	5	0	0	0	0	0	0	0	0	0	0	0	0	0	0	0	3
Spirochaeta thermophila	0	0	155	0	0	0	0	0	0	0	0	0	0	0	0	0	0	0	0	0	0	0	0	8	0	0	0	0	0	0	0	0	0	0	0	0	0	0	0	0	0	0	0	0	0	0	0	0	8
Spirosoma linguale	0	5	34	5	0	0	0	0	0	0	0	0	0	2	0	0	0	0	0	1	5	0	0	4	0	0	0	0	0	0	0	0	4	0	0	0	0	0	0	0	0	0	3	0	0	0	0	0	2
Stackebrandtia nassauensis	85	254	1046	60	19	0	0	0	24	4	0	0	0	0	0	20	0	8	0	2	0	0	0	18	0	36	198	0	0	0	0	0	27	0	16	0	0	0	5	8	0	2	7	0	0	4	0	0	99
Staphylococcus aureus	52	101	141	69	85	91	103	38	83	80	134966	27	18	86	21616	366378	9365	11	416	15	292	546	19566	32	61	376039	743	177	78	139	409	183345	18597	31	203	302	136	18	28	17	22	161	25	54	682	46	11546	215	62
Staphylococcus carnosus	26	59	173	32	2	0	9	7	33	47	9	12	10	18	17	14	2	4	0	0	52	0	4	30	11	177	153	9	2	16	0	22	35	0	55	45	0	0	5	1	25	150	793	0	0	6	5	0	10
Staphylococcus epidermidis	21	28	44	16	66	5	17	2	9	3	691	0	0	1	22	691	16	11	1	2	43	0	45	7	3	639	53	25	3	18	0	2989	14	205	67	8	1	1	12	3	0	5	6	0	15	16	66	0	165
Staphylococcus haemolyticus	21	42	136	29	4	1	7	3	12	10	23	1	0	1	15	53	5	2	2	0	64	3	35	20	7	436	120	9	5	59	0	106	73	1	19	4	0	0	3	0	2	3	24	1	0	6	39	0	6
Staphylococcus lugdunensis	15	27	111	21	3	0	8	3	6	8	32	1	0	2	26	29	1	2	0	0	32	2	41	17	7	649	90	5	2	9	0	45	19	0	8	1	0	0	3	0	0	2	2	0	0	5	9	0	7
Staphylococcus pseudintermedius	18	25	94	0	0	0	0	2	8	0	9	0	0	0	12	19	2	0	0	0	34	3	28	15	8	438	108	0	0	0	0	347	23	0	0	2	0	0	0	0	0	0	9	0	2	0	3	0	6
Staphylococcus saprophyticus	15	30	117	52	2	0	4	3	4	8	16	1	0	2	1	20	0	4	0	1	48	0	4	17	4	22	101	3	3	11	0	15	46	0	9	1	0	0	3	0	0	1	12	0	0	4	12	0	3
Staphylothermus hellenicus	0	4	21	0	0	0	0	0	0	0	0	0	0	0	0	0	0	0	0	0	5	0	0	1	1	0	2	0	0	0	0	0	0	0	0	0	0	0	0	0	0	0	0	0	0	0	0	0	0
Staphylothermus marinus	0	4	27	21	0	0	0	0	0	0	0	0	0	0	0	0	0	0	0	0	8	0	0	0	2	0	0	0	0	0	0	0	3	0	0	3	0	0	0	0	0	0	4	0	0	0	0	0	1
Starkeya novella	16	79	274	22	7	0	0	0	0	0	0	0	0	0	0	0	0	12	0	0	5	0	0	34	0	12	25	0	0	0	0	0	0	0	0	0	0	0	0	0	0	0	0	0	0	0	0	0	22
Stenotrophomonas maltophilia	0	0	0	0	0	0	0	0	0	25	0	0	0	0	0	66701	136376	325014	419	702	0	0	49	0	0	37	51	0	0	0	0	59	204064	0	0	0	0	0	0	0	0	0	0	0	3730	18	0	0	56
Stigmatella aurantiaca	0	55	227	17	0	7	0	0	5	0	0	0	0	0	0	0	0	3	0	0	0	0	0	0	0	0	21	0	0	3	0	0	0	0	0	6	0	0	0	0	0	0	3	0	0	5	0	0	15
Streptobacillus moniliformis	283	67	497	300	2	0	13	0	13	11	0	1	0	8	0	2	0	2	0	0	515	6	5	48	14	13	83	1	1	14	0	14	202	0	43	1	0	0	3	0	0	4	8	0	0	2	0	0	4
Streptococcus agalactiae	138	324	532	83	180	2	55	12	137	22	2	3	0	8	0	8	3	42	1	1	100	46	157	60	34	188	905	21	26	51	0	0	215	0	113	17	0	0	19	3	0	4	2	8	0	34	2	0	160
Streptococcus dysgalactiae	74	173	351	76	61	0	23	5	53	13	0	2	0	2	0	5	0	15	0	1	99	6	100	39	23	38	509	10	9	22	0	2	131	0	56	6	0	0	8	1	0	1	3	0	1	16	0	0	77
Streptococcus equi	160	344	1915	272	90	3	59	10	95	30	0	3	0	6	0	4	1	46	0	6	221	35	87	141	28	139	900	25	7	77	0	11	245	1	198	21	0	0	22	7	7	7	21	18	2	25	2	2	131
Streptococcus gallolyticus	865	1422	1389	433	89	2	31	11	209	37	1	0	0	3	2	3	0	6	0	1	31	48	83	54	25	114	634	51	22	29	0	2	84	3	39	8	0	0	39	30	0	4	0	4	2	4	4	1	50
Streptococcus gordonii	2063	3579	6190	2482	2065	252	2724	567	10517	690	17	118	23	136	32	1324	117	673	11	20	9010	211	1193	790	9666	2694	10575	1380	658	2743	1	10	6997	14	2018	7870	15	29	1676	268	18	355	337	328	2840	51509	102	35	2325
Streptococcus infantarius	2240	3946	4133	1234	137	6	132	27	537	71	2	5	0	7	8	12	4	44	0	5	636	80	164	149	110	376	1289	138	49	87	0	20	419	5	111	14	0	3	45	24	0	13	7	17	5	31	3	2	218
Streptococcus macedonicus	606	1167	1313	361	146	3	73	9	170	44	2	4	0	4	2	13	9	25	2	3	722	39	78	76	125	123	1356	48	22	56	0	10	178	5	49	15	0	0	73	38	0	9	4	4	5	32	0	1	200
Streptococcus mitis	10019	15654	22683	14939	1876	117	10601	3512	3327	4828	168	419	91	207	99	80	326	5327	16	33	3215	450	349	5948	560	6448	14753	5484	6942	13280	6	19	13124	70	20150	8378	11	78	3823	279	52	339	596	1593	31	175	389	67	23030
Streptococcus mutans	262	559	820	206	357	6	220	114	621	154	2	4	1	11	5	234	4	12	2	5	346	46	623	226	94	185	1843	57	26	47	0	5	263	1	275	32	3	23	103	707	38	102	64	15	4	164	2	2	1505
Streptococcus oralis	8725	17136	32056	9511	17845	1226	12651	1989	19201	4623	91	244	47	186	267	154	2805	11125	30	52	3064	489	485	3427	827	38948	17932	16798	5177	14497	5	23	33100	85	8686	7533	10	588	1749	300	52	479	518	5410	119	1066	175	146	29153
Streptococcus parasanguinis	41494	99296	156471	33804	4482	385	8261	1388	90106	10375	178	756	104	2392	852	5966	1736	10027	51	52	355557	3817	798	8608	58930	7066	123263	4016	807	9889	20	111	40310	162	3934	739	22	61	10585	2038	184	1562	429	925	66	304	94	461	88298
Streptococcus parauberis	97	270	508	102	71	1	24	9	59	18	2	2	0	2	1	3	1	14	0	1	109	7	121	43	19	43	587	12	6	26	0	6	151	0	49	4	0	0	8	2	0	1	9	2	2	19	1	0	56
Streptococcus pasteurianus	79	200	292	80	119	3	20	5	50	10	0	0	0	2	1	3	1	12	0	0	68	5	93	20	13	37	635	8	4	15	0	0	110	0	34	8	0	0	10	2	0	2	1	5	0	6	0	2	60
Streptococcus pneumoniae	9707	14341	20225	12958	3098	181	10284	2877	6681	4316	143	371	70	196	90	304	367	4012	16	24	2797	472	285	5101	408	8802	14411	5162	5420	11876	6	20	13882	73	15254	6890	7	113	3491	216	41	283	425	1617	85	365	335	140	20153
Streptococcus pseudopneumoniae	5495	8346	11995	8026	1195	73	5905	1806	2024	2428	84	246	44	109	53	29	202	2680	6	17	1030	290	194	3080	172	3903	7547	2625	3246	7176	2	0	6905	41	9213	4296	3	44	2132	139	29	174	270	864	14	85	197	38	12215
Streptococcus pyogenes	1446	2700	2791	760	111	8	149	31	132	32	0	3	0	0	9	9	2	12	0	0	1403	10	84	32	212	71	595	89	46	48	0	5	149	2	66	20	0	3	24	29	1	43	2	9	2	18	4	0	115
Streptococcus salivarius	236400	392398	344540	116987	3804	164	12772	1807	37429	7109	341	268	45	146	592	234	52	260	21	23	7231	9781	184	9092	1737	22819	70301	15492	4649	3919	12	105	2219	453	2337	281	11	78	8637	9975	69	3857	224	712	236	329	127	189	3752
Streptococcus sanguinis	2379	4521	10015	2036	991	60	722	2835	17352	953	49	202	145	307	65	13706	36	282	12	26	2386	395	1452	1231	8567	18840	42905	10023	4047	7289	1	14	52530	28	9508	1614	11	13	312	62	9	74	57	174	323	5978	81	76	1553
Streptococcus suis	309	627	854	233	186	5	102	21	165	34	0	6	0	3	2	12	7	35	0	3	473	33	118	79	70	99	1261	80	30	75	0	2	299	0	96	14	1	0	28	13	0	6	4	11	2	28	4	2	190
Streptococcus thermophilus	41440	67807	58198	20447	661	39	9014	464	6620	1315	33	35	19	30	91	65	19	117	4	11	3243	2128	72	1432	485	3929	9358	2723	857	888	2	15	826	91	542	225	10	44	1038	3971	7	285	49	125	407	61	11	32	1189
Streptococcus uberis	133	317	576	106	80	2	25	11	64	15	1	2	0	4	0	3	1	16	0	2	103	4	148	48	20	48	686	13	12	24	0	4	164	0	49	6	0	0	9	2	0	4	11	2	0	16	0	0	65
Streptomyces avermitilis	96	373	1074	53	21	6	6	0	9	0	0	0	0	0	0	5	0	6	0	0	4	0	0	15	5	15	133	0	0	0	0	0	11	0	4	10	0	0	6	0	0	0	0	0	0	5	0	0	136
Streptomyces bingchenggensis	58	228	895	45	25	0	0	0	11	0	0	0	0	0	0	8	0	5	0	0	5	0	0	20	6	18	81	0	0	0	0	0	9	4	10	12	0	0	10	2	0	0	5	0	0	8	0	0	62
Streptomyces cattleya	152	414	1607	72	58	0	11	0	16	0	0	0	0	0	0	41	0	11	0	0	0	0	0	34	0	60	232	0	0	0	0	0	16	0	17	34	0	0	11	0	0	0	11	0	0	18	0	0	169
Streptomyces coelicolor	120	412	1452	74	35	0	0	0	12	0	0	0	0	0	0	18	0	8	0	0	5	0	0	30	7	21	173	0	0	0	0	2	22	0	17	18	0	0	14	2	0	0	0	0	0	6	0	0	137
Streptomyces flavogriseus	101	288	1004	32	15	0	0	0	14	0	0	0	0	0	0	8	0	9	0	0	11	0	0	29	0	29	116	0	0	0	0	0	15	0	20	6	0	0	6	0	0	6	6	0	0	5	0	0	94
Streptomyces griseus	49	237	856	35	25	0	0	0	9	0	0	0	0	0	0	16	0	8	0	0	0	0	0	18	6	19	108	0	0	0	0	0	21	0	13	17	0	0	0	0	0	0	7	0	0	0	0	0	114
Streptomyces scabiei	68	248	962	44	28	0	0	6	8	5	0	0	0	0	0	11	0	10	0	4	0	5	0	26	11	32	125	0	0	7	0	0	18	0	18	29	0	0	4	0	0	0	4	0	0	0	0	0	110
Streptomyces sp.	101	317	1154	66	36	0	8	0	18	0	0	0	0	0	0	14	0	0	0	0	5	0	0	41	7	30	110	0	0	0	0	0	14	0	16	9	0	0	6	5	0	0	5	0	0	9	0	0	127
Streptomyces violaceusniger	49	178	706	40	17	0	0	0	1	0	2	0	0	3	0	14	0	7	0	0	6	0	0	14	6	20	88	0	0	0	0	0	16	0	14	10	0	0	5	5	0	0	0	0	0	0	0	0	64
Streptosporangium roseum	84	360	1184	61	27	0	5	0	8	3	0	0	0	5	0	14	0	3	0	0	4	0	0	39	5	35	176	3	0	5	0	0	22	4	17	18	0	0	9	8	0	0	7	5	0	0	0	0	124
Sulfobacillus acidophilus	0	3	7	2	0	0	0	0	0	0	0	0	0	0	0	0	0	0	0	0	1	0	0	0	0	0	0	0	0	0	0	0	0	0	0	0	0	0	0	0	0	0	0	0	0	0	0	0	0
Sulfolobus acidocaldarius	3	13	23	3	0	0	0	0	0	0	0	0	0	0	0	0	0	0	0	0	4	0	0	1	0	1	4	0	0	0	0	0	0	0	0	0	0	0	0	0	0	0	11	0	0	0	0	0	0
Sulfolobus islandicus	0	0	7	0	0	0	0	0	0	0	0	0	0	0	0	0	0	0	0	0	0	0	0	0	0	0	0	0	0	0	0	0	0	0	0	0	0	0	0	0	0	0	0	0	0	0	0	0	0
Sulfolobus solfataricus	0	2	35	2	0	0	0	0	0	0	0	0	0	0	0	0	0	0	0	0	6	0	0	2	0	0	2	0	0	0	0	0	2	0	0	0	0	0	0	0	0	0	3	0	0	0	0	0	4
Sulfolobus tokodaii	0	3	37	4	0	0	0	0	0	0	0	0	0	0	0	0	0	0	0	0	3	0	0	1	0	8	8	0	0	0	0	0	3	0	0	0	0	0	0	0	0	0	5	0	0	0	0	0	4
Sulfuricurvum kujiense	3	3	51	9	0	0	0	0	0	0	0	0	0	0	0	0	0	0	0	0	7	0	0	2	1	0	3	0	0	0	0	0	4	0	0	0	0	0	0	0	0	0	0	0	0	0	0	0	1
Sulfurihydrogenibium azorense	10	13	69	32	0	0	0	0	0	0	0	0	0	0	0	0	0	0	0	0	20	0	0	5	2	4	5	0	0	0	0	0	9	0	0	0	0	0	0	0	0	2	35	0	0	0	0	0	1
Sulfurihydrogenibium sp.	9	11	95	13	0	0	0	0	10	7	0	0	0	0	0	0	0	0	0	0	11	0	3	4	3	2	11	0	8	2	0	0	9	0	1	2	0	0	1	0	0	0	3	0	0	2	0	0	3
Sulfurimonas autotrophica	4	15	78	11	2	0	0	0	0	2	0	0	0	0	0	0	0	0	0	0	21	0	6	7	0	0	16	0	0	2	0	0	9	0	3	0	0	0	0	0	0	0	6	0	0	0	0	0	0
Sulfurimonas denitrificans	4	8	50	10	0	0	0	0	1	2	0	0	0	0	0	0	0	0	0	0	9	0	0	3	0	1	5	0	0	2	0	0	6	0	1	0	0	0	0	0	0	0	6	0	0	0	0	0	2
Sulfurospirillum deleyianum	6	7	49	6	0	0	0	0	3	0	0	0	0	0	0	0	0	0	0	0	12	0	1	3	0	0	5	0	0	0	0	0	3	0	0	0	0	0	0	0	0	0	0	0	0	0	0	0	0
Sulfurovum sp.	2	9	46	7	0	0	0	0	1	0	0	0	0	0	0	0	0	0	0	0	4	0	0	2	0	1	4	0	0	0	0	0	0	0	0	0	0	0	0	0	0	0	2	0	0	0	0	0	0
Symbiobacterium thermophilum	63	157	557	47	10	0	0	0	7	0	0	0	0	0	0	0	0	0	0	0	28	0	0	0	7	0	48	0	0	0	0	0	14	0	0	0	0	0	0	0	0	0	0	0	0	0	0	0	49
Synechococcus sp.	0	20	326	0	2	0	0	0	0	0	0	0	0	0	0	0	0	5	0	0	0	0	3	22	3	0	29	7	0	5	0	0	0	0	0	11	0	0	0	0	0	0	0	0	0	19	0	0	0
Syntrophobacter fumaroxidans	0	16	42	0	0	0	0	0	0	0	0	0	0	0	0	0	0	0	0	0	0	0	0	0	0	0	6	0	0	0	0	0	0	0	0	0	0	0	0	0	0	0	0	0	0	1	0	0	3
Syntrophobotulus glycolicus	12	16	84	13	0	0	4	0	2	0	0	0	0	0	0	0	0	0	0	0	27	0	0	5	0	4	7	0	0	0	0	0	7	0	1	0	0	0	0	0	0	4	0	0	0	0	0	0	4
Syntrophomonas wolfei	4	7	33	9	0	0	0	0	1	0	0	0	0	1	0	0	0	0	0	0	19	0	0	8	2	4	3	0	0	0	0	0	3	0	1	0	0	0	0	0	0	0	10	0	0	0	0	0	1
Syntrophothermus lipocalidus	0	0	52	6	0	0	0	0	0	0	0	0	0	0	0	0	0	0	0	0	14	0	0	2	0	0	6	0	0	0	0	0	0	0	0	0	0	0	0	0	0	0	0	0	0	0	0	0	0
Syntrophus aciditrophicus	4	6	0	5	0	0	0	0	0	0	0	0	0	0	0	0	0	0	0	0	5	0	0	0	2	2	9	0	0	0	0	0	0	0	0	0	0	0	0	0	0	0	4	0	0	0	0	0	2
Tannerella forsythia	257	324	1846	309	12	0	9	1	11	42	3	5	1	11	5	0	0	17	0	13	366	15	198	3499	72	0	20	0	0	24	0	15	434	1	14	0	0	0	6	2	0	4	0	0	0	0	0	6	52
Taylorella asinigenitalis	6	0	49	0	0	0	0	0	0	0	0	0	0	0	0	0	0	2	0	0	24	0	0	0	0	2	5	0	0	0	0	0	5	0	3	0	0	0	0	0	0	0	0	0	0	0	0	0	2
Taylorella equigenitalis	0	0	50	18	0	0	0	0	0	0	0	0	0	0	0	0	0	0	0	0	0	0	0	0	4	0	6	0	0	0	0	0	9	0	2	0	0	0	0	0	0	0	0	0	0	0	0	0	4
Tepidanaerobacter sp.	9	20	131	15	0	0	0	0	0	0	0	0	0	0	0	0	0	0	0	0	28	0	1	12	0	0	10	0	0	0	0	0	0	0	1	0	0	0	0	0	0	0	4	0	0	1	0	0	0
Teredinibacter turnerae	0	0	18	8	0	0	0	0	0	0	0	0	0	0	0	0	0	0	0	0	3	0	0	0	0	0	0	0	0	0	0	0	3	0	0	0	0	0	0	0	0	0	0	0	0	0	0	0	0
Terriglobus saanensis	4	12	35	6	0	0	0	0	1	0	0	0	0	0	0	0	0	0	0	0	5	0	0	2	0	1	5	0	0	0	0	0	2	0	0	3	0	0	0	0	0	0	0	0	0	0	0	0	2
Tetragenococcus halophilus	18	44	126	37	10	0	3	6	8	7	0	0	0	3	0	2	0	6	0	0	42	3	15	20	30	0	130	2	1	9	0	4	32	0	8	0	0	0	3	1	0	1	10	1	0	16	0	1	0
Thauera sp.	38	69	298	0	8	8	0	0	0	0	18	56	34	18	0	0	2	12	0	0	7	0	0	62	5	9	52	0	0	0	0	0	40	35	67	63	8	0	0	0	48	73	299	18	0	0	0	60	22
Thermaerobacter marianensis	0	0	0	0	14	0	0	0	0	0	0	0	0	0	0	13	0	0	0	0	0	0	0	0	0	0	0	0	0	0	0	0	0	0	0	0	0	0	0	0	0	0	0	0	0	0	0	0	0
Thermincola potens	9	16	82	9	0	0	0	0	0	0	0	0	0	1	0	0	0	0	0	0	28	0	0	5	0	4	3	0	1	0	0	0	8	0	0	0	0	0	0	0	0	0	0	0	0	0	0	0	0
Thermoanaerobacter italicus	2	3	30	6	0	0	0	0	0	0	0	0	0	0	0	0	0	0	0	0	6	0	1	0	0	1	2	0	0	0	0	0	2	0	0	0	0	0	0	0	0	0	0	0	0	0	0	0	0
Thermoanaerobacter mathranii	0	1	13	2	0	0	0	0	0	0	0	0	0	0	0	0	0	0	0	0	7	0	0	1	0	0	12	0	0	0	0	0	3	0	0	0	0	0	0	0	0	0	2	0	0	0	0	0	0
Thermoanaerobacter sp.	0	0	1	0	0	0	0	0	0	0	0	0	0	0	0	0	0	0	0	0	2	0	0	0	0	0	0	0	0	0	0	0	0	0	0	0	0	0	0	0	0	0	0	0	0	0	0	0	0
Thermoanaerobacter tengcongensis	0	11	85	16	0	0	0	0	0	0	0	0	0	0	0	0	0	0	0	0	20	0	3	8	0	0	7	0	0	1	0	0	7	0	2	0	0	0	0	0	0	0	0	0	0	0	0	0	0
Thermoanaerobacter wiegelii	4	6	50	8	0	0	0	0	0	0	0	0	0	0	0	0	0	0	0	0	8	0	4	7	0	5	4	0	0	0	0	0	4	0	0	0	0	0	0	0	0	0	4	0	0	0	0	0	0
Thermoanaerobacterium thermosaccharolyticum	9	16	282	34	0	0	1	0	15	0	0	0	0	0	0	0	0	1	0	0	23	0	6	8	0	3	8	0	1	1	0	0	9	0	8	0	0	0	0	0	0	0	7	0	0	2	0	0	3
Thermoanaerobacterium xylanolyticum	6	18	87	23	1	0	0	0	0	0	0	0	0	0	0	0	0	0	0	0	20	0	0	7	0	2	9	0	0	1	0	0	12	0	2	0	0	0	0	0	0	0	6	0	0	0	0	0	1
Thermobaculum terrenum	0	0	52	0	0	0	0	0	0	0	0	0	0	0	0	0	0	0	0	0	0	0	0	1	0	0	0	0	0	0	0	0	0	0	0	0	0	0	0	0	0	0	0	0	0	0	0	0	0
Thermobifida fusca	184	520	1717	83	35	0	0	11	39	0	0	0	0	0	0	16	0	9	0	0	0	0	0	52	13	35	186	0	0	9	0	0	11	0	15	16	0	0	10	0	0	0	0	0	0	0	0	0	153
Thermobispora bispora	138	451	1593	0	49	0	0	0	28	0	0	0	0	0	0	24	0	23	0	0	14	0	0	41	12	64	197	0	0	0	0	0	29	0	33	27	0	0	0	0	0	0	0	0	0	15	0	0	190
Thermococcus barophilus	1	5	23	8	0	0	0	0	0	0	0	0	0	0	0	0	0	0	0	0	9	0	0	3	2	3	2	0	0	0	0	0	2	0	0	0	0	0	0	0	0	2	0	0	0	0	0	0	0
Thermococcus gammatolerans	0	2	14	0	0	0	0	0	0	0	0	0	0	0	0	0	0	0	0	0	3	0	0	0	0	0	3	0	0	0	0	0	0	0	0	0	0	0	0	0	0	0	0	0	0	0	0	0	6
Thermococcus kodakarensis	0	0	14	2	0	0	0	0	0	0	0	0	0	0	0	0	0	0	0	0	0	0	0	0	0	0	0	0	0	0	0	0	0	0	0	0	0	0	0	0	0	0	0	0	0	0	0	0	0
Thermococcus onnurineus	0	4	17	0	0	0	0	0	0	0	0	0	0	0	0	0	0	0	0	0	2	0	0	0	0	0	0	0	0	0	0	0	0	0	0	0	0	0	0	0	0	0	0	0	0	0	0	0	0
Thermococcus sibiricus	0	8	44	3	0	0	0	0	0	0	0	0	0	0	0	0	0	0	0	0	4	0	0	0	0	0	2	0	0	0	0	0	0	0	0	0	0	0	0	0	0	0	2	0	0	0	0	0	0
Thermococcus sp.	0	17	38	0	0	0	0	0	0	0	0	0	0	0	0	0	0	0	0	0	0	0	0	0	0	0	0	0	0	0	0	0	0	0	0	0	0	0	0	0	0	0	0	0	0	0	0	0	0
Thermocrinis albus	4	7	20	3	0	0	0	0	0	0	0	0	0	0	0	0	0	0	0	0	7	0	0	0	0	0	0	0	0	0	0	0	3	0	0	0	0	0	0	0	0	0	0	0	0	0	0	0	0
Thermodesulfatator indicus	3	6	40	7	0	0	0	0	2	0	0	0	0	0	0	0	0	0	0	0	12	2	1	0	0	0	5	0	0	0	0	0	0	0	0	0	0	0	0	0	0	3	0	0	0	0	0	0	0
Thermodesulfobacterium sp.	4	11	117	26	0	0	0	0	14	4	0	0	0	0	0	0	0	0	0	0	20	0	8	18	2	16	17	7	0	3	0	0	6	0	1	2	0	0	2	0	0	0	11	0	0	5	0	0	0
Thermodesulfobium narugense	0	0	62	26	0	0	0	0	2	0	0	0	0	2	0	0	0	0	0	0	0	0	2	4	0	0	0	2	0	2	0	0	17	0	0	4	0	0	0	0	0	0	13	0	0	0	0	0	2
Thermodesulfovibrio yellowstonii	10	16	76	17	0	0	0	0	0	0	0	0	0	0	0	0	0	0	0	0	8	0	2	4	0	1	10	0	0	0	0	0	4	0	4	0	0	0	0	2	0	0	2	0	0	0	0	0	3
Thermofilum pendens	0	0	17	0	0	0	0	0	0	0	0	0	0	0	0	0	0	0	0	0	0	0	0	0	0	0	5	0	0	0	0	0	0	0	0	0	0	0	0	0	0	0	0	0	0	0	0	0	0
Thermomicrobium roseum	11	14	107	10	0	0	0	0	0	0	0	0	0	0	0	0	0	0	0	0	0	0	8	0	0	0	23	0	0	0	0	0	0	0	0	0	0	0	0	0	0	0	0	0	0	0	0	0	3
Thermomonospora curvata	181	447	1833	80	55	0	10	0	54	0	0	0	0	8	0	29	0	14	0	0	10	7	0	81	13	96	367	0	0	5	0	0	40	0	46	63	0	0	26	9	0	7	0	0	0	8	0	0	236
Thermoplasma acidophilum	0	0	9	0	0	0	0	0	0	0	0	0	0	0	0	0	0	0	0	0	3	0	0	0	0	0	0	0	0	0	0	0	0	0	0	0	0	0	0	0	0	0	0	0	0	0	0	0	0
Thermoplasma volcanium	0	0	41	2	0	0	0	0	0	0	0	0	0	0	0	0	0	0	0	0	3	0	0	0	0	0	3	0	0	0	0	0	9	0	0	0	0	0	0	0	0	0	0	0	0	0	0	0	0
Thermoproteus neutrophilus	0	19	59	0	0	0	0	0	0	0	0	0	0	0	0	0	0	0	0	0	0	0	0	0	0	0	0	0	0	0	0	0	0	0	0	0	0	0	0	0	0	0	0	0	0	0	0	0	0
Thermoproteus tenax	0	28	158	0	0	0	0	0	0	0	0	0	0	0	0	0	0	0	0	0	0	0	0	0	0	0	0	0	0	0	0	0	0	0	0	0	0	0	0	0	0	0	10	0	0	0	0	0	0
Thermoproteus uzoniensis	0	0	58	0	0	0	0	0	0	0	0	0	0	0	0	0	0	0	0	0	0	0	0	0	0	0	0	0	0	0	0	0	0	0	0	0	0	0	0	0	0	0	0	0	0	0	0	0	0
Thermosediminibacter oceani	9	21	108	17	0	0	0	0	0	0	0	0	0	0	0	0	0	0	0	0	10	0	0	5	0	3	5	0	0	0	0	0	5	0	0	0	0	0	2	0	0	0	0	0	0	0	0	0	0
Thermosipho africanus	12	18	85	21	0	0	2	0	0	2	0	0	0	0	0	2	0	1	0	0	19	0	2	6	2	2	17	0	0	1	0	0	5	0	7	0	0	0	0	0	0	1	22	0	6	0	0	0	2
Thermosipho melanesiensis	11	11	70	26	0	0	2	0	1	1	0	0	0	2	0	0	0	0	0	0	15	0	2	10	4	4	8	0	0	0	0	0	9	0	4	0	0	0	0	0	0	0	11	0	0	0	0	0	0
Thermosphaera aggregans	0	0	10	0	0	0	0	0	0	0	0	0	0	0	0	0	0	0	0	0	0	0	0	0	0	0	0	2	0	0	0	0	0	0	0	0	0	0	0	0	0	0	0	0	0	0	0	0	0
Thermosynechococcus elongatus	0	0	0	0	0	0	0	0	0	0	0	0	0	0	0	0	0	0	0	0	0	0	0	5	0	0	0	0	0	0	0	0	0	0	0	0	0	0	0	0	0	0	0	0	0	0	0	0	4
Thermotoga lettingae	3	6	37	11	0	0	0	0	0	1	0	0	0	0	0	0	0	0	0	0	7	0	0	3	1	0	4	0	0	0	0	0	3	0	0	0	0	0	0	0	0	0	1	0	0	0	0	0	1
Thermotoga maritima	0	3	9	2	0	0	0	0	0	0	0	0	0	0	0	0	0	0	0	0	0	0	0	8	0	0	0	0	0	0	0	0	2	0	0	0	0	0	0	0	0	0	0	0	0	0	0	0	0
Thermotoga naphthophila	0	0	2	0	0	0	0	0	0	0	0	0	0	0	0	0	0	0	0	0	0	0	0	0	0	0	0	0	0	0	0	0	0	0	0	0	0	0	0	0	0	0	0	0	0	0	0	0	0
Thermotoga neapolitana	3	0	19	4	0	0	0	0	2	0	0	0	0	2	0	0	0	0	0	0	6	0	0	0	2	0	0	0	0	0	0	0	3	0	0	0	0	0	0	0	0	0	0	0	0	0	0	0	0
Thermotoga petrophila	0	0	3	0	0	0	0	0	0	0	0	0	0	0	0	0	0	0	0	0	0	0	0	0	0	0	0	0	0	0	0	0	0	0	0	0	0	0	0	0	0	0	0	0	0	0	0	0	0
Thermotoga sp.	0	0	3	0	0	0	0	0	0	0	0	0	0	0	0	0	0	0	0	0	2	0	0	0	0	0	0	0	0	0	0	0	0	0	0	0	0	0	0	0	0	0	0	0	0	0	0	0	0
Thermotoga thermarum	4	5	41	6	0	0	0	0	0	0	0	0	0	0	0	0	0	0	0	0	6	0	1	1	2	0	9	0	0	0	0	0	4	0	0	0	0	0	0	0	0	0	0	0	0	0	0	0	0
Thermovibrio ammonificans	0	0	27	0	0	0	0	0	0	0	0	0	0	0	0	0	0	0	0	0	0	0	0	0	0	0	0	0	0	0	0	0	0	0	0	0	0	0	0	0	0	0	0	0	0	0	0	0	0
Thermovirga lienii	3	4	27	4	0	0	0	0	0	0	0	0	0	0	0	0	0	2	0	0	10	0	0	3	0	0	2	0	0	0	0	0	9	0	0	0	0	0	0	0	0	0	0	0	0	0	0	0	0
Thermus scotoductus	0	0	128	0	0	0	0	0	0	0	0	0	0	0	0	0	0	0	0	0	0	0	0	0	0	0	0	0	0	0	0	0	0	0	0	0	0	0	0	0	0	0	17	0	0	0	0	0	14
Thermus thermophilus	0	0	99	0	0	0	0	0	0	0	0	0	0	0	0	0	0	0	0	0	0	0	0	0	0	0	0	0	65	0	0	0	0	0	0	0	0	0	0	0	0	0	0	0	0	0	0	0	0
Thioalkalimicrobium cyclicum	8	6	45	0	0	0	0	0	0	0	0	0	0	0	0	0	0	0	0	0	8	0	0	3	0	0	3	0	0	0	0	0	5	0	0	0	0	0	0	0	0	0	100	0	0	0	0	0	3
Thioalkalivibrio sp.	15	77	356	18	0	0	0	0	0	0	0	0	0	0	0	0	0	0	0	0	19	0	0	0	0	0	40	0	0	0	0	0	37	0	0	0	0	0	0	0	0	0	0	0	0	17	0	0	0
Thioalkalivibrio sulfidophilus	0	86	224	14	0	0	0	0	0	0	0	0	13	26	0	0	0	0	0	0	19	0	0	0	0	16	43	0	0	0	0	0	0	819	495	849	483	0	0	0	25	0	74	0	4	0	0	87	23
Thiobacillus denitrificans	15	27	214	0	35	23	0	0	0	0	0	0	0	0	0	0	0	11	0	0	0	0	0	0	12	14	12	0	0	0	0	0	0	0	22	0	0	0	0	0	0	0	0	0	0	0	0	0	11
Thiomicrospira crunogena	10	12	75	0	0	0	0	0	0	0	0	0	0	0	0	0	0	0	0	0	5	0	0	0	5	10	3	0	0	0	0	2	0	0	0	0	0	0	0	0	0	0	0	0	0	0	0	0	0
Thiomonas intermedia	0	53	154	18	0	0	0	0	0	0	0	0	0	0	0	0	0	7	0	0	15	0	0	0	0	0	12	0	0	0	0	0	0	0	0	0	0	0	0	0	0	0	0	0	0	0	0	0	15
Tolumonas auensis	3	9	46	8	0	0	0	0	3	0	0	0	0	0	0	0	0	0	0	0	0	0	0	2	1	0	9	0	0	0	0	0	3	4	5	3	0	5	4	3	2	2	49	0	0	0	0	0	0
Treponema azotonutricium	0	0	59	0	0	0	0	0	0	0	0	0	0	0	0	0	0	0	0	0	0	0	1	3	0	0	0	0	0	0	0	0	15	0	0	0	0	0	0	0	0	0	5	0	0	0	0	0	3
Treponema brennaborense	12	10	87	8	0	0	0	0	0	0	0	0	0	0	0	0	0	0	0	0	16	0	0	0	0	6	8	0	0	0	0	0	45	0	0	0	0	0	0	0	0	0	0	0	0	0	0	0	4
Treponema denticola	17	33	434	53	1	0	1	0	10	3	0	0	0	1	0	1	0	0	0	0	59	4	3	16	5	11	11	6	1	0	0	2	253	0	6	2	0	0	2	1	0	1	11	0	0	0	0	0	19
Treponema primitia	0	0	49	0	0	0	0	0	0	0	0	0	0	0	0	0	0	0	0	0	0	0	0	4	0	0	0	0	0	0	0	0	7	0	0	0	0	0	0	0	0	0	6	0	0	0	0	0	22
Treponema succinifaciens	11	15	291	25	0	0	2	0	0	0	0	0	0	0	0	0	0	0	0	0	41	0	5	12	0	5	8	0	0	1	0	0	23	0	1	9	0	0	2	1	0	0	14	0	0	0	0	0	0
Trichodesmium erythraeum	0	7	40	9	0	0	1	0	3	1	0	0	0	0	0	1	0	2	0	0	7	1	1	3	1	0	9	1	0	1	0	0	0	0	1	0	0	0	0	0	0	0	7	0	1	2	0	0	2
Tropheryma whipplei	0	25	59	0	0	0	0	0	0	0	0	0	0	0	0	0	0	0	0	0	0	0	0	0	0	0	0	0	0	0	0	0	0	0	0	0	0	0	0	0	0	0	0	0	0	0	0	0	11
Truepera radiovictrix	13	69	296	16	0	0	0	0	0	0	0	0	0	0	0	3	0	0	0	0	20	0	0	37	0	0	0	0	0	0	0	0	0	0	0	0	0	0	0	0	0	0	0	0	0	0	0	0	17
Tsukamurella paurometabola	124	477	1472	92	51	0	3	0	0	0	0	0	0	12	0	0	0	0	0	0	5	0	0	44	31	26	130	0	0	6	0	0	11	10	22	14	0	0	7	0	0	0	0	0	0	0	0	0	180
Uncultured methanogenic	0	4	27	3	0	0	0	0	0	0	0	0	0	0	0	0	0	0	0	0	2	0	0	0	0	0	3	0	0	0	0	0	0	0	0	0	0	0	0	0	0	0	2	0	0	0	0	0	3
Uncultured Termite	0	0	116	18	0	0	0	0	4	0	0	0	0	0	0	0	0	0	0	0	0	0	0	0	0	0	0	0	0	0	0	0	0	0	0	0	0	0	0	0	0	0	0	0	0	0	0	0	0
Ureaplasma urealyticum	2	13	63	11	0	0	0	0	3	0	0	0	0	0	0	0	0	0	0	0	11	0	0	8	0	0	7	3	0	0	0	3	5	0	0	0	0	0	0	0	0	0	8	0	0	0	0	0	0
Variovorax paradoxus	20	133	420	26	29	0	0	0	12	0	7	0	0	0	0	3	0	15	0	0	0	0	0	0	12	6	70	0	0	0	0	0	0	0	6	0	0	0	0	0	0	0	0	0	0	5	0	0	23
Veillonella parvula	65194	85962	227247	52440	4682	636	4356	1266	10467	5720	217	1086	159	1479	220	549	946	5282	39	407	94109	1652	1688	12012	32861	26890	73010	1730	780	4541	8	16044	82107	227	7784	9166	47	102	3607	1401	205	1582	501	1101	246	46	78	359	5416
Verminephrobacter eiseniae	0	23	149	0	4	7	0	0	3	0	0	0	3	10	0	0	0	6	0	0	0	0	0	0	1	0	33	0	0	0	0	0	23	0	15	0	0	0	0	0	0	0	11	0	0	0	0	2	11
Verrucosispora maris	99	280	1019	63	25	0	0	5	11	0	0	0	0	0	0	15	0	9	0	0	0	0	0	19	11	22	125	0	0	0	0	0	13	0	14	10	0	0	0	0	0	0	0	0	0	16	0	0	94
Vibrio anguillarum	0	6	27	0	0	0	0	0	0	1	0	0	0	0	0	0	0	0	0	0	11	0	0	0	1	1	4	0	0	0	0	0	4	0	0	0	0	0	0	0	0	0	1	0	0	1	0	0	0
Vibrio cholerae	0	0	0	0	0	0	0	0	0	0	0	0	0	0	0	0	0	0	0	0	0	0	0	0	0	0	0	0	0	0	0	0	0	0	0	0	0	0	2	0	0	0	30	0	0	0	0	0	0
Vibrio fischeri	0	6	41	2	0	0	1	0	1	1	0	0	0	0	0	0	0	0	0	0	10	0	0	0	1	3	7	0	0	0	0	0	5	0	0	0	0	0	0	0	0	0	14	0	0	0	0	0	1
Vibrio furnissii	0	3	21	0	0	0	0	0	0	0	0	0	0	0	0	0	0	1	0	0	3	0	1	2	0	1	7	0	0	0	0	0	4	0	1	0	0	0	0	0	0	0	3	0	0	0	0	0	0
Vibrio harveyi	0	0	0	2	0	0	0	0	0	0	0	0	0	0	0	0	0	0	0	0	4	0	1	0	1	0	2	0	0	0	0	0	0	0	0	0	0	0	0	0	0	0	1	0	0	0	0	0	0
Vibrio parahaemolyticus	1	0	0	5	0	0	0	0	1	0	0	0	0	0	0	0	0	0	0	0	6	0	0	0	0	1	4	1	0	0	0	0	0	0	0	0	0	0	0	0	0	0	1	0	0	0	0	0	0
Vibrio sp.	1	4	32	3	0	0	0	0	2	0	0	0	0	0	0	0	0	0	0	0	10	1	4	3	6	1	7	0	0	0	0	0	6	0	1	0	0	1	1	0	0	0	14	0	0	0	0	0	1
Vibrio splendidus	0	1	0	0	0	0	0	0	1	0	0	0	0	0	0	0	0	0	0	0	4	0	1	0	0	0	4	0	0	0	0	0	0	0	0	0	0	0	0	0	0	0	0	0	0	0	0	0	0
Vibrio vulnificus	0	0	13	0	0	0	0	0	0	0	0	0	0	0	0	0	0	0	0	0	0	0	0	0	0	0	1	0	0	0	0	0	1	0	0	0	0	0	0	0	0	0	14	0	0	0	0	0	0
Vulcanisaeta distributa	0	2	15	0	0	0	0	0	0	0	0	0	0	0	0	0	0	0	0	0	2	0	0	3	0	0	0	0	0	0	0	0	0	0	1	0	0	0	0	0	0	0	0	0	0	0	0	0	0
Vulcanisaeta moutnovskia	0	3	17	3	0	0	0	0	0	0	0	0	0	0	0	0	0	0	0	0	0	0	0	0	0	0	2	0	0	0	0	0	0	0	0	0	0	0	0	0	0	0	0	0	0	0	0	0	0
Waddlia chondrophila	2	9	19	6	0	0	0	0	0	0	0	0	0	0	0	0	0	0	0	0	4	0	0	6	0	0	2	0	0	0	0	0	1	0	0	0	0	0	0	0	0	0	0	0	0	0	0	0	0
Weeksella virosa	10	12	86	10	0	0	0	0	0	2	0	0	0	0	0	0	0	2	0	0	13	4	9	15	0	2	0	0	0	0	0	0	11	0	4	0	0	0	0	0	0	0	14	0	0	1	0	0	7
Weissella koreensis	19	22	109	20	4	0	0	3	6	4	0	0	0	0	0	4	0	4	0	0	33	0	4	10	6	11	57	0	0	4	0	4	15	0	6	0	0	0	1	0	0	0	18	0	0	2	0	0	8
Wigglesworthia glossinidia	24	111	563	52	0	0	0	0	0	0	0	0	0	0	0	0	0	0	0	0	49	0	0	0	8	23	65	0	0	0	0	0	0	0	0	0	0	0	0	0	0	4	0	0	0	7	0	0	16
Wolbachia endosymbiont	6	20	90	12	0	0	0	0	0	0	0	0	0	0	0	0	0	0	0	0	19	0	0	0	0	0	16	0	0	0	0	0	8	0	0	0	0	0	0	0	0	0	2	0	0	0	0	0	0
Wolbachia sp.	0	2	17	0	0	0	0	0	0	0	0	0	0	0	0	0	0	0	0	0	0	0	0	0	0	0	6	0	0	0	0	0	0	0	0	0	0	0	0	0	0	0	0	0	0	0	0	0	0
Wolinella succinogenes	4	12	25	4	0	0	0	0	0	0	0	0	0	0	0	0	0	0	0	0	14	0	0	0	0	3	3	0	0	0	0	0	5	0	0	0	0	0	0	0	0	0	0	0	0	0	0	0	1
Xanthobacter autotrophicus	0	67	208	24	0	0	0	0	0	0	0	0	0	0	0	0	0	8	0	0	11	0	0	0	0	7	31	0	0	0	0	0	0	0	0	0	0	0	0	0	0	0	11	0	0	0	0	0	28
Xanthomonas albilineans	0	0	0	11	0	0	0	0	0	0	0	0	0	0	0	0	0	0	0	4	0	0	0	0	0	0	8	0	0	0	0	0	43	0	0	0	0	0	0	0	0	0	0	0	0	0	0	0	19
Xanthomonas axonopodis	0	0	0	0	0	0	0	0	0	0	0	0	0	0	0	0	0	0	0	0	0	0	0	0	0	0	0	0	0	0	0	0	81	0	0	0	0	0	0	0	0	0	0	0	0	0	0	0	0
Xanthomonas campestris	0	0	0	0	224	139	0	0	0	0	9	0	0	0	0	0	0	0	0	0	0	0	0	0	0	5	6	0	0	0	0	0	528	0	14	0	0	0	0	0	0	0	14	0	0	0	0	0	0
Xanthomonas oryzae	0	0	0	0	0	0	0	0	0	0	0	0	0	0	0	0	0	0	0	0	0	0	0	0	0	0	0	0	0	0	0	0	227	0	0	2	0	0	0	0	0	0	0	0	0	0	0	0	0
Xenorhabdus bovienii	4	4	29	5	0	0	0	0	0	0	0	0	0	0	0	0	0	0	0	0	2	0	0	0	2	0	8	0	0	0	0	0	0	0	3	0	0	0	0	0	0	0	34	0	0	0	0	0	0
Xenorhabdus nematophila	2	4	42	6	0	0	0	0	0	0	0	0	0	0	0	0	0	0	0	0	6	0	0	2	3	0	3	0	0	0	0	0	3	0	0	0	0	4	2	3	1	2	97	0	0	0	0	0	3
Xylanimonas cellulosilytica	1140	3474	12019	461	273	0	22	18	92	20	11	0	0	41	0	102	0	44	0	0	10	0	14	191	63	256	1414	0	0	30	0	0	79	0	118	247	0	0	43	20	0	15	0	0	0	52	0	0	1142
Xylella fastidiosa	0	0	10	0	0	0	0	0	0	0	0	0	0	0	0	0	0	2	0	0	0	0	0	0	0	2	0	0	0	0	0	0	7	9	0	5	4	0	0	0	0	0	0	0	0	0	0	0	0
Yersinia enterocolitica	0	3	22	0	0	0	0	0	0	0	0	1	0	106	0	1	1	0	0	0	8	0	0	2	0	4	0	0	0	3	0	0	7	1	3	114	4	3	2	5	1	2	53	0	1	2	0	1	3
Yersinia pestis	0	0	3	0	0	0	0	0	0	0	0	0	0	0	0	0	0	0	0	0	0	0	0	0	0	0	0	0	0	0	0	0	0	0	0	0	0	0	0	0	0	0	2	0	0	0	0	0	0
Yersinia pseudotuberculosis	0	0	5	0	0	0	0	0	0	0	0	0	0	0	0	0	0	0	0	0	0	0	0	0	0	0	0	0	0	0	0	0	0	0	0	0	0	0	1	0	0	0	4	0	0	0	0	0	0
Zobellia galactanivorans	4	0	37	5	0	0	0	0	3	1	0	0	0	1	0	1	0	2	0	3	3	0	0	0	0	1	4	0	0	1	0	0	7	0	5	0	0	0	0	0	0	4	60	0	0	1	0	0	5
Zunongwangia profunda	4	12	57	11	0	0	0	0	5	2	0	0	0	0	0	1	0	1	0	0	6	0	3	5	2	1	6	0	0	2	0	0	7	0	4	0	0	0	0	0	0	0	10	0	0	0	0	0	4
Zymomonas mobilis	0	0	55	0	0	0	0	0	0	0	0	0	0	0	0	0	0	0	0	0	0	0	0	0	0	0	0	0	0	0	0	0	0	0	0	0	0	0	0	0	0	0	0	0	0	0	0	0	4
Total	802353	1559047	4105422	589271	298439	113384	92926	27294	291167	60443	254842	122280	61905	54810	78466	476100	174265	469159	1490	11010	703759	236900	42581	620358	210990	624038	1109080	649731	794751	474055	564	211364	572758	232906	203630	236017	106965	149191	403688	357266	113135	162552	1171469	194544	32946	164644	18227	24945	1216375
[truncated: 14 more columns]

## Sheet: Virus
Species		Host*	PSAW1.1	PSAW1.2	PSAW1.3	PSAW1.4	PSAW2.1	PSAW2.2	PSBW1.1	PSBW1.2	PSBW1.3	PSBW1.4	PSBM3.1	PSCW5.1	PSCW5.2	PSCW5.3	PSCM2.1	PSAM10.1	PSAM10.2	PSAM10.3	PSAW11.1	PSAW11.2	PSAW10.1	PSBM10.1	PSBW12.1	PSCW13.1	PIAM2.1	PIAM2.2	PIAM2.3	PIAM5.1	PIAM5.2	PIAM5.3	PIAM5.4	PIAM10.1	PIAW11.1	PIBM5.1	PIBM5.2	PIBM5.3	PIBM5.4	PICM2.1	PICM2.2	PICM2.3	PICW4.1	PICW4.2	PICW4.3	PICW7.1	PICM6.1	PIAM11.1	PIAM12.1
Acanthamoeba	polyphaga	LE	0	0	1	0	0	0	0	0	0	0	0	0	0	0	0	0	0	0	0	0	0	0	0	0	0	0	0	0	0	0	0	0	0	0	0	0	0	0	0	0	0	0	0	0	0	0	0
Acinetobacter	phage	P	0	0	0	0	0	0	0	0	0	0	0	0	0	0	0	0	0	0	0	0	0	0	0	0	0	0	1	0	0	0	0	0	0	0	0	0	0	0	0	0	0	0	0	0	0	0	0
Actinomyces	phage	P	0	0	0	0	0	0	0	0	0	0	0	0	0	0	0	0	0	0	0	0	0	0	0	0	0	0	0	0	0	0	0	0	0	0	0	0	0	0	0	0	0	0	0	0	0	0	0
Aeromonas	phage	P	0	0	0	0	0	0	0	0	0	0	0	0	0	0	0	1	0	0	0	0	0	0	0	0	0	0	0	0	0	0	0	0	0	0	0	0	0	0	0	0	0	0	0	0	0	0	0
Anguillid	herpesvirus	NM	0	0	0	0	0	0	0	0	0	0	0	0	0	0	0	0	0	0	0	0	0	0	0	2	0	0	0	0	0	0	0	0	0	0	0	0	0	0	0	0	0	0	0	0	0	0	0
Anomala	cuprea	NM	0	0	0	0	0	0	0	0	0	0	0	0	0	0	0	0	0	10	0	0	0	0	0	0	0	0	0	0	0	0	0	0	0	0	0	0	0	0	0	0	0	0	0	0	0	0	0
Autographa	californica	NM	0	0	0	0	0	0	0	0	0	0	0	0	0	0	0	0	0	0	0	0	0	0	0	0	0	0	0	0	0	0	0	0	0	0	0	0	0	1	0	0	0	0	0	0	0	0	0
Bacillus	phage	P	1	2	4	2	1	0	0	0	0	0	0	0	0	0	0	1	0	0	0	0	0	0	0	1	0	2	4	0	0	1	0	0	1	0	0	0	0	0	0	0	0	0	0	0	0	0	0
Bacteriophage	Aaphi23	P	0	0	0	0	0	0	0	0	0	0	0	0	0	0	34	0	0	0	0	0	0	0	0	0	0	0	0	0	0	0	0	0	0	0	0	0	0	0	0	0	0	0	0	0	0	0	0
Bacteroides	phage	P	1	1	0	0	0	0	0	0	0	0	0	0	0	0	0	0	0	0	0	0	0	0	0	0	0	0	0	0	0	0	0	0	0	0	0	0	0	0	0	0	0	0	0	0	0	0	0
Brochothrix	phage	P	1	0	0	0	0	0	0	0	0	0	0	0	0	0	0	0	0	0	0	0	0	0	0	0	0	0	0	0	0	0	0	0	0	0	0	0	0	0	0	0	0	0	0	0	0	0	0
Burkholderia	phage	P	10	0	0	0	658	461	0	0	0	0	0	0	0	0	0	0	0	0	0	0	0	0	0	0	0	0	0	0	0	0	0	0	0	0	0	0	0	0	0	0	0	8	0	0	0	0	0
Burkholderia	prophage	P	0	0	0	0	5	3	0	0	0	0	0	0	0	0	0	0	0	0	0	0	0	0	0	0	0	0	0	0	0	0	0	0	0	0	0	0	0	0	0	0	0	0	0	0	0	0	0
Cafeteria	roenbergensis	LE	0	1	0	0	0	0	0	0	0	0	0	0	0	0	0	0	0	0	0	0	0	0	0	0	0	0	0	0	0	0	0	0	0	0	0	0	0	0	0	0	0	0	0	0	0	0	0
Caulobacter	phage	P	0	0	3	1	0	0	0	0	0	0	0	0	0	0	0	0	0	0	0	0	0	0	0	0	0	0	0	0	0	0	0	0	0	0	0	4	0	0	0	0	0	0	0	0	0	0	0
Cercopithecine	herpesvirus	M	0	0	0	0	0	0	0	0	0	0	0	0	0	0	0	0	0	0	0	0	0	0	0	0	0	0	0	0	0	0	0	0	0	0	0	0	0	0	0	0	0	0	0	0	0	0	0
Citrus	endogenous	NM	0	0	0	0	0	0	0	0	0	0	0	0	0	0	0	0	0	0	0	0	0	0	0	0	0	0	0	0	0	0	0	0	0	0	0	0	0	0	0	0	0	0	0	0	0	4	0
Clostridium	phage	P	0	1	1	1	0	0	0	0	0	0	0	0	0	0	0	0	0	0	0	0	0	0	0	0	0	0	0	0	0	0	0	0	0	0	0	0	0	0	0	0	0	0	0	0	0	0	0
Corynebacterium	phage	P	0	0	1	0	0	0	0	0	0	0	0	0	0	0	0	0	0	0	0	0	0	0	0	0	0	0	0	0	0	0	0	0	0	0	0	0	0	0	0	0	0	0	0	0	0	0	0
Cronobacter	phage	P	0	0	0	0	0	0	0	0	0	0	0	0	0	0	0	0	0	0	0	0	0	0	0	0	0	0	1	0	0	0	0	0	0	0	0	0	0	0	0	0	0	0	1	0	0	0	0
Cyanophage	Syn30	P	1	0	3	1	0	0	0	0	0	0	0	0	0	0	0	0	0	0	0	0	0	0	0	0	0	0	0	0	0	0	0	0	1	0	0	0	0	0	0	0	0	0	0	0	0	0	0
Cyprinid	herpesvirus	NM	0	0	0	0	0	0	0	0	0	0	0	0	0	0	0	4	0	0	0	0	0	0	0	0	0	0	0	0	0	0	0	0	0	0	0	0	0	0	0	2	0	0	0	0	0	0	0
Emiliania	huxleyi	LE	0	0	0	0	0	1	0	0	0	0	0	0	0	0	0	0	0	0	0	0	0	0	0	0	0	0	0	0	0	0	0	0	0	0	0	0	0	0	0	0	0	0	0	0	0	0	0
Enterobacter	phage	P	0	0	0	0	0	0	0	0	0	0	0	0	0	0	0	0	0	0	0	0	0	0	0	0	0	0	0	0	0	0	0	0	0	0	0	0	0	0	0	0	0	0	0	0	0	0	0
Enterobacteria	phage	P	1	0	0	1	0	0	0	0	0	0	0	0	1	0	0	0	0	0	0	0	1	0	0	4	0	0	0	0	0	0	0	0	0	0	4	1	0	31	27	36	11	6	706	0	0	0	20
Enterococcus	phage	P	0	0	0	0	0	0	0	0	0	0	0	0	0	0	0	0	0	0	0	44	0	0	0	0	0	0	0	0	0	0	0	59	0	0	0	0	0	0	0	0	0	0	0	0	0	0	0
Erwinia	phage	P	0	0	10	2	0	0	0	0	0	0	0	0	0	0	0	0	0	0	0	0	0	0	0	0	5	0	0	0	1	0	0	0	0	0	0	0	0	0	0	0	0	0	1	0	0	0	0
Escherichia	phage	P	0	0	0	0	0	0	0	0	0	0	0	0	0	0	0	0	0	0	0	0	0	0	0	0	0	0	1	0	0	0	0	0	0	0	0	0	0	0	0	0	0	0	1	0	0	0	0
Falconid	herpesvirus	NM	0	0	0	0	0	0	0	0	0	0	0	0	0	0	0	2	0	0	0	0	0	0	0	0	0	0	0	0	0	0	0	0	0	0	0	0	0	0	0	0	0	0	0	0	0	0	0
Geobacillus	virus	P	0	0	0	0	0	0	0	0	0	0	0	0	0	0	0	0	0	0	0	0	0	0	0	0	0	0	0	0	1	0	0	0	0	0	0	0	0	0	0	0	0	0	0	0	0	0	0
Haemophilus	phage	P	0	0	0	0	0	0	0	0	0	0	0	0	0	0	6	0	0	0	0	0	0	1	0	0	0	0	0	0	0	0	0	0	0	0	1	1	0	0	0	0	0	0	0	0	0	0	0
Halomonas	phage	P	0	0	0	0	0	0	0	0	0	0	0	0	0	0	0	0	0	0	0	0	0	0	0	0	0	0	0	0	0	0	0	0	0	0	0	1	0	0	0	0	0	0	0	0	0	0	0
Human	endogenous	M	0	0	0	1	0	0	0	0	1	0	0	0	0	2	0	0	1	0	1	0	0	0	0	0	0	1	1	0	0	1	0	1	0	0	0	1	0	0	1	0	0	0	6	0	0	0	0
Human	herpesvirus	M	0	2	1	0	0	0	32	12	17	23	1	0	0	0	0	6	0	0	0	0	0	45	0	0	4	30	14	650	121	243	0	34	3	1	1	0	0	0	0	0	0	0	0	0	1	25	0
Human	adenovirus	M	0	0	2	52	12	3	229	0	0	0	0	90	0	0	66	3	0	0	0	0	8	0	0	0	0	0	1	0	0	128	0	2	0	44	0	0	0	56	0	0	47	2	0	0	0	0	0
Human	bocavirus	M	0	0	0	0	0	0	0	0	0	0	0	0	0	0	0	0	0	0	0	0	0	0	0	0	0	0	0	0	0	0	0	0	0	0	0	0	0	0	0	0	0	0	0	0	0	0	0
Human	papillomavirus	M	0	0	0	0	0	0	0	0	0	0	0	0	0	0	0	0	0	0	0	0	0	0	0	0	0	0	0	0	0	2	0	0	0	0	0	0	0	0	1	0	0	0	0	0	0	0	0
Hyposoter	fugitivus	NM	0	0	0	0	0	0	0	0	0	0	0	0	0	0	0	0	0	0	0	0	0	0	0	0	0	0	0	0	0	0	0	0	0	0	0	0	0	0	0	0	0	0	0	0	0	0	0
Ictalurid	herpesvirus	NM	0	0	0	0	0	0	0	0	0	0	0	0	0	0	0	0	0	0	0	0	0	0	0	0	0	0	0	0	0	0	0	0	0	0	0	0	0	0	0	0	0	0	0	0	0	0	0
Impatiens	necrotic	NM	0	0	0	0	0	0	0	0	0	0	0	0	0	0	0	0	0	0	0	0	0	0	0	0	0	0	0	0	0	0	0	0	0	0	0	0	0	0	0	0	0	0	0	0	0	0	0
Lactobacillus	johnsonii	P	0	0	0	0	0	0	0	0	1	0	0	0	0	0	0	0	0	0	0	0	0	0	0	0	0	0	0	0	0	0	0	0	0	0	0	0	0	0	0	0	0	0	0	0	0	0	0
Lactobacillus	prophage	P	0	0	0	0	0	0	0	0	20	0	0	0	0	0	0	0	0	0	0	0	0	3	0	0	0	0	0	0	0	0	0	0	0	0	0	0	0	0	0	0	0	0	0	0	0	0	0
Lactobacillus	phage	P	0	0	0	0	4	1	0	1	70	0	0	0	0	0	0	0	0	0	0	0	0	1	0	0	0	0	0	0	0	0	0	0	0	0	3	3	0	0	0	0	0	0	0	0	0	0	0
Lactococcus	phage	P	0	1	0	0	1	1	2	0	0	0	0	0	0	0	0	0	0	0	0	0	0	0	0	0	0	0	0	1	0	0	0	0	1	1	1	0	0	0	0	0	0	0	1	1	21	0	0
Leuconostoc	phage	P	0	0	0	0	0	0	0	0	0	0	0	0	0	0	0	0	0	0	0	0	0	0	0	0	0	0	0	0	0	0	0	0	0	0	0	0	0	0	0	0	0	0	0	0	0	0	0
Lymantria	xylina	NM	0	0	0	0	0	0	0	0	0	0	3	0	0	0	0	0	0	0	0	0	0	0	0	0	0	0	0	0	0	0	0	0	0	0	0	0	0	0	0	0	0	0	0	0	0	0	0
Microbacterium	phage	P	0	2	10	6	0	0	0	0	0	0	0	0	0	0	0	0	0	0	0	0	0	0	0	0	0	0	0	0	0	0	0	0	0	0	0	0	0	0	0	0	0	0	0	0	0	0	0
Mycobacterium	phage	P	4	13	54	12	0	0	0	0	0	0	0	0	0	0	0	0	0	3	0	0	0	0	0	0	1	1	21	0	0	0	0	0	0	0	0	0	0	0	0	0	0	0	0	0	0	1	0
Oenococcus	phage	P	1	0	0	0	0	0	0	0	0	0	0	0	0	0	0	0	0	0	0	0	0	0	0	0	0	0	0	0	0	0	0	0	0	0	0	0	0	0	0	0	0	0	0	0	0	0	0
Orf	virus	M	0	0	0	0	0	0	0	0	0	0	0	0	0	0	0	0	0	0	0	0	0	0	0	0	0	0	0	0	0	0	0	0	0	0	0	0	0	0	0	0	0	0	0	0	0	0	0
Pandoravirus	salinus	LE	0	0	0	0	0	0	0	0	0	0	0	0	0	0	0	0	0	0	0	0	0	0	0	0	0	0	0	0	0	0	0	0	0	0	0	0	0	1	0	0	0	0	0	0	0	0	0
Pandoravirus	dulcis	LE	0	1	4	0	0	0	0	0	0	0	0	2	0	0	0	0	0	0	0	0	0	0	0	0	0	0	0	0	0	0	0	0	1	0	0	0	0	0	0	0	0	0	0	0	0	0	0
Paramecium	bursaria	LE	0	0	0	0	0	0	0	0	0	1	0	0	0	0	0	0	0	0	0	0	0	0	0	1	0	0	0	0	0	0	0	0	0	0	0	1	0	0	0	0	0	0	0	0	0	0	0
Pectobacterium	phage	P	0	0	0	0	0	0	0	0	0	0	0	0	0	0	0	0	0	0	0	0	0	0	0	0	0	0	0	0	0	0	0	0	0	0	0	0	0	0	0	2	0	0	2	0	0	0	0
Phage	Gifsy-2	P	0	0	0	0	0	0	0	0	0	0	0	0	0	0	0	0	0	0	0	0	0	0	0	0	0	0	0	0	0	0	0	0	0	0	0	0	0	0	2	0	0	0	6	0	0	0	0
Phage	cdtI	P	0	0	0	0	0	0	0	0	0	0	0	0	0	0	0	0	0	0	0	0	0	0	0	0	0	0	0	0	0	0	0	0	0	0	0	0	0	0	0	0	0	0	5	0	0	0	0
Plutella	xylostella	NM	0	0	0	0	0	0	0	0	0	0	0	0	0	0	0	0	0	0	0	0	0	0	0	0	0	0	0	0	0	0	0	0	0	0	0	0	0	0	0	0	0	0	0	0	0	0	0
Porcine	endogenous	M	0	1	2	0	1	0	0	0	0	0	0	0	0	0	0	0	0	0	0	0	0	0	0	0	0	0	0	0	0	0	0	0	0	0	0	1	0	0	0	0	0	0	0	0	0	0	0
Potato	leafroll	NM	0	0	0	1	0	0	0	0	0	0	0	0	0	0	0	0	0	0	0	0	0	0	0	0	0	0	0	0	0	0	0	0	0	0	0	0	0	0	0	0	0	0	0	0	0	0	0
Propionibacterium	phage	P	0	0	0	0	1	0	0	0	1	0	0	0	0	0	0	0	0	0	0	0	0	0	0	0	0	0	1	0	0	1	0	1	0	0	0	0	0	0	0	0	0	0	1	0	0	0	0
Pseudomonas	phage	P	0	1	27	1	0	0	4	4	3	0	495	2485	1404	1083	0	5	0	1	0	3	0	0	0	275	1	145	3	230	224	126	0	1	38	6019	3040	4737	1965	3235	9521	8370	3930	5515	19281	54	55	0	2
Ralstonia	phage	P	0	0	0	0	0	0	0	0	0	0	0	0	0	0	0	0	0	0	0	0	0	0	0	0	0	0	0	0	0	0	0	0	6	0	0	0	0	0	0	0	0	0	0	0	0	0	0
Rhodococcus	phage	P	2	0	2	0	0	0	0	0	0	0	0	0	0	0	0	0	0	0	0	0	0	0	0	0	0	0	0	0	0	0	0	0	0	0	0	0	0	0	0	0	0	0	0	0	0	0	0
Salinivibrio	phage	P	0	0	0	0	0	0	0	0	0	0	0	0	0	0	0	0	0	1	0	0	0	0	0	0	0	0	0	0	0	0	0	0	0	0	0	0	0	0	0	0	0	0	0	0	0	0	0
Salmonella	phage	P	0	0	0	0	0	0	0	0	0	0	0	0	0	0	0	0	0	0	0	0	0	0	0	0	0	0	0	0	0	0	0	0	0	0	0	0	0	0	0	0	0	0	1	0	0	0	0
Shigella	phage	P	0	0	0	0	0	0	0	0	0	0	0	0	0	0	0	0	0	0	0	0	0	0	0	0	0	0	0	0	0	0	0	0	0	0	0	0	0	0	0	0	0	0	1	0	0	0	0
Simbu	virus	M	0	0	0	0	0	0	0	0	0	0	1	0	0	0	0	0	0	0	0	0	0	0	0	0	0	0	0	0	0	0	0	0	0	0	0	0	0	0	0	0	0	0	1	0	0	0	0
Small	anellovirus	M	0	0	0	0	0	0	0	0	0	0	0	0	0	0	0	0	0	0	0	0	0	0	0	0	0	0	0	0	0	0	0	0	0	0	0	0	0	0	0	0	0	0	0	0	0	0	0
Spodoptera	litura	NM	0	0	0	0	0	0	0	0	0	0	0	0	0	0	0	0	0	0	0	0	0	0	0	0	0	0	0	0	0	0	0	0	0	0	0	0	0	1	0	0	0	0	0	0	0	0	0
Staphylococcus	prophage	P	0	0	0	0	0	0	0	0	0	0	1	0	0	0	1	27	3	0	0	0	0	0	0	0	0	1	0	0	0	0	0	6	0	0	0	0	0	0	0	0	0	0	0	0	0	0	0
Staphylococcus	phage	P	3	1	20	0	0	0	1	0	0	0	177	0	0	0	31	285	6	0	0	0	2	1	2	0	0	297	0	0	0	1	0	113	57	5	0	0	0	0	1	0	0	0	0	0	0	0	63
Stenotrophomonas	phage	P	0	0	0	0	0	0	0	0	0	1	0	0	0	0	0	630	1105	2265	1	6	0	0	0	1	0	0	0	0	0	0	0	0	1343	0	0	0	0	0	0	0	0	0	0	0	48	0	0
Streptococcus	phage	P	45	218	226	416	172	1	153	23	454	55	1	10	0	1	0	2	1	18	0	0	191	10	3	81	8	366	92	66	16	437	0	0	159	1	697	80	0	1	9	1	1	3	1	18	2	1	10
Streptococcus	prophage	P	8	1	6	8	5	0	13	2	10	14	0	1	0	0	0	1	0	2	0	0	2	1	0	8	0	11	7	0	0	5	0	0	3	0	0	230	0	0	3	0	0	0	0	14	0	0	0
Streptococcus	pyogenes	P	0	0	1	0	0	0	0	0	0	0	0	0	0	0	0	0	0	0	0	0	0	0	0	0	0	0	0	0	0	0	0	0	0	0	0	0	0	0	0	0	0	0	0	0	0	0	0
Streptomyces	phage	P	0	0	0	0	0	0	0	0	0	0	0	0	0	0	0	0	0	0	0	0	0	0	0	0	0	0	3	0	0	0	0	0	0	0	0	0	0	0	0	0	0	0	0	0	0	0	0
Synechococcus	phage	P	2	0	4	0	0	0	0	0	0	0	0	0	0	0	0	0	0	0	0	0	0	0	0	0	1	0	1	0	0	0	0	0	0	0	0	0	0	0	0	0	0	0	0	0	0	0	0
Thermus	phage	P	0	1	2	0	0	0	0	0	0	0	0	0	0	0	0	0	0	0	0	0	0	0	0	0	0	0	0	0	0	0	0	0	0	0	0	0	0	0	0	0	0	0	0	0	0	0	0
Tobacco	vein	NM	0	0	0	0	0	0	0	0	0	0	0	0	0	0	0	0	0	0	0	0	0	0	0	0	0	0	0	0	0	0	0	0	0	0	0	0	0	0	0	0	0	0	0	0	0	0	0
Torque	teno	M	0	0	0	0	3	1	0	0	0	0	0	0	0	0	3	16	10	1	0	1	0	0	2	0	0	0	0	1	0	0	1	0	0	0	0	0	0	0	1	0	0	0	0	0	0	0	0
TTV-like	mini	M	0	0	0	0	0	0	0	0	0	0	0	0	0	0	0	0	0	0	0	0	0	0	0	0	0	0	0	0	0	0	0	2	0	0	0	0	0	0	0	0	0	0	0	0	0	0	0
UNVERIFIED:	Staphylococcus	P	0	0	0	0	0	0	0	0	0	0	0	0	0	0	0	0	0	0	0	0	0	0	0	0	0	0	0	0	0	2	0	0	0	0	0	0	0	0	0	0	0	0	0	0	0	0	0
Vibrio	phage	P	0	0	1	0	0	0	0	0	0	0	0	0	0	0	0	0	0	0	0	0	0	0	0	0	0	0	1	0	0	0	0	0	2	0	0	0	0	0	0	0	0	0	0	0	0	0	0
Wheat	dwarf	NM	0	0	0	0	0	0	0	0	0	0	0	0	0	0	0	0	0	0	0	0	0	0	0	0	0	0	0	0	0	0	0	0	0	0	0	0	0	0	0	0	0	0	0	0	1	0	0
Xanthomonas	phage	P	0	0	0	0	0	0	0	0	0	0	0	0	0	0	0	0	0	0	0	0	0	0	0	0	0	0	0	0	0	0	0	0	0	0	0	0	0	0	0	0	0	0	0	0	2	0	0
Yersinia	pestis	P	0	0	0	0	0	0	0	0	0	0	0	0	0	0	0	0	0	0	0	0	0	0	0	0	0	0	0	0	0	0	0	0	0	0	0	0	0	0	0	0	0	0	1	0	0	0	0
	TOTAL		81	248	397	509	864	479	435	42	581	94	679	2594	1405	1086	142	991	1131	2303	4	58	204	70	13	378	20	862	154	950	369	954	1	219	1615	6076	3748	5067	1966	3327	9566	8412	3991	5537	20038	88	133	41	98
* Host
P → Prokaryote
M → Mammalian
NM → Non_mammalian
LE → Low_eukaryote
[truncated: 16 more columns]

## Sheet: Fungi
Species	PSAW1.1	PSAW1.2	PSAW1.3	PSAW1.4	PSAW2.1	PSAW2.2	PSBW1.1	PSBW1.2	PSBW1.3	PSBW1.4	PSBM3.1	PSCW5.1	PSCW5.2	PSCW5.3	PSCM2.1	PSAM10.1	PSAM10.2	PSAM10.3	PSAW11.1	PSAW11.2	PSAW10.1	PSBM10.1	PSBW12.1	PSCW13.1	PIAM2.1	PIAM2.2	PIAM2.3	PIAM5.1	PIAM5.2	PIAM5.3	PIAM5.4	PIAM10.1	PIAW11.1	PIBM5.1	PIBM5.2	PIBM5.3	PIBM5.4	PICM2.1	PICM2.2	PICM2.3	PICW4.1	PICW4.2	PICW4.3	PICW7.1	PICM6.1	PIAM11.1	PIAM12.1	PIAW10.1	PIBM10.1
Acremonium chrysogenum	0	0	37	0	0	0	0	0	0	0	0	0	0	0	0	0	0	0	37	110	0	0	0	0	0	0	0	0	0	0	0	0	0	0	0	0	0	0	0	0	0	0	0	0	0	0	0	0	0
Acremonium implicatum	134	89	402	45	0	0	0	0	0	0	0	0	0	0	0	0	0	0	0	89	0	0	0	0	0	0	0	0	0	0	0	0	45	0	0	0	0	0	0	0	0	0	0	0	0	0	45	0	0
Allomyces macrogynus	0	0	0	0	0	0	0	0	0	0	0	0	0	0	0	0	0	0	0	0	0	0	0	0	0	0	17	0	0	0	0	0	0	0	0	0	0	0	0	0	0	0	0	0	0	0	0	0	0
Annulohypoxylon stygium	30	7	60	0	0	0	0	0	0	0	0	0	0	0	0	0	0	0	0	37	0	0	0	0	0	0	7	0	0	0	0	0	7	0	0	0	0	0	0	0	0	0	0	0	0	0	7	0	0
Arthroderma obtusum	0	41	83	41	0	0	0	0	0	0	0	0	0	0	0	0	0	0	0	0	0	0	0	0	0	41	0	0	0	0	0	0	166	0	0	0	0	0	0	0	0	0	0	0	0	0	0	0	0
Arthroderma uncinatum	280	140	876	35	0	0	0	0	0	0	0	0	0	0	0	0	0	0	0	0	0	0	0	0	0	70	35	0	0	0	0	0	280	0	0	0	0	0	0	0	0	0	0	0	0	0	0	0	0
Aspergillus fumigatus	626	694	4787	658	0	0	0	0	33	0	327	0	0	0	0	0	0	0	0	0	65	0	0	0	167	440	33	0	0	0	0	67	326	0	0	0	0	0	0	0	0	0	0	0	98	386	0	0	0
Aspergillus nidulans	150	60	331	30	0	0	0	0	30	0	0	0	0	0	0	0	0	0	0	0	0	0	0	0	0	0	0	0	0	0	0	30	60	0	0	0	0	0	0	0	0	0	0	0	0	0	0	0	0
Aspergillus niger	64	0	192	32	0	0	0	0	0	0	0	0	0	0	0	0	0	0	0	32	0	0	0	0	0	0	0	0	0	0	0	32	32	0	0	0	0	0	0	0	0	0	0	0	0	0	32	0	0
Aspergillus oryzae	34	0	0	0	0	0	0	0	0	0	0	0	0	0	0	0	0	0	0	0	0	0	0	0	0	0	0	0	0	0	0	0	0	0	0	0	0	0	0	0	0	0	0	0	0	0	0	0	0
Aspergillus tubingensis	59	59	297	0	0	0	0	0	0	0	0	0	0	0	0	0	0	0	0	0	0	0	0	0	0	30	0	0	0	0	0	0	119	0	0	0	0	0	0	0	0	0	0	0	0	0	0	0	0
Aspergillus ustus	30	30	60	0	0	0	0	0	0	0	0	0	0	0	0	0	0	0	0	0	0	0	0	0	0	0	0	0	0	0	0	0	30	0	0	0	0	0	0	0	0	0	0	0	0	0	0	0	0
Blastocladiella emersonii	0	27	27	0	0	0	0	0	0	0	0	0	0	0	0	0	0	0	0	0	0	0	0	0	0	0	27	0	0	0	0	0	27	0	0	27	0	0	27	0	0	0	0	0	0	0	0	0	0
Candida albicans	0	0	0	0	142	6	29	0	25	0	0	0	0	0	0	570	1	100	0	2	0	1	0	0	3	341	55	5	2	2	0	29	355	128	29	89	42	0	0	0	0	1	29	0	41	62	0	0	2
Candida blackwellae	0	0	0	0	0	0	0	0	0	0	0	0	0	0	0	0	0	0	0	0	0	0	0	0	0	0	31	0	0	0	0	0	0	0	0	0	0	0	0	0	0	0	0	0	0	0	0	0	0
Candida buenavistaensis	0	0	0	0	0	0	0	0	0	0	0	0	0	0	0	0	0	0	0	0	0	0	0	0	0	22	0	0	0	0	0	0	0	0	0	0	0	0	0	0	0	0	0	0	0	0	0	0	0
Candida dubliniensis	0	0	0	0	14	0	0	0	0	0	0	0	0	0	0	11	0	3	0	1	0	0	0	0	0	251	25	0	0	0	0	0	20	8	0	0	5	0	0	0	0	0	0	0	3	2	0	0	0
Candida glabrata	0	0	0	0	0	0	0	0	50	0	0	0	0	0	0	0	0	0	0	0	0	0	0	0	3694	0	0	0	0	0	0	0	0	0	0	0	0	0	0	0	0	0	0	0	124	26538	0	0	0
Candida maltosa	0	0	0	0	0	0	0	0	0	0	0	0	0	0	0	0	0	0	0	0	0	0	0	0	0	16	0	0	0	0	0	0	0	0	0	0	0	0	0	0	0	0	0	0	0	0	0	0	0
Candida neerlandica	0	0	0	0	0	0	0	0	0	0	0	0	0	0	0	0	0	0	0	0	0	0	0	0	0	62	0	0	0	0	0	0	0	0	0	0	0	0	0	0	0	0	0	0	0	0	0	0	0
Candida saraburiensis	0	0	0	0	0	0	0	0	0	0	0	0	0	0	0	0	0	0	0	0	0	0	0	0	0	31	0	0	0	0	0	0	0	0	0	0	0	0	0	0	0	0	0	0	0	0	0	0	0
Candida sojae	0	0	0	0	0	0	0	0	0	0	0	0	0	0	0	0	0	0	0	0	0	0	0	0	0	25	25	0	0	0	0	0	0	0	0	0	0	0	0	0	0	0	0	0	0	0	0	0	0
Candida tetrigidarum	0	0	0	0	0	0	0	0	0	0	0	0	0	0	0	0	0	0	0	0	0	0	0	0	0	19	0	0	0	0	0	0	0	0	0	0	0	0	0	0	0	0	0	0	0	0	0	0	0
Candida vartiovaarae	0	0	0	0	0	0	0	0	0	0	0	0	0	0	0	0	0	0	0	0	0	0	0	0	0	0	0	0	0	0	0	0	0	0	0	0	0	0	0	0	0	0	0	0	0	0	0	0	0
Candida viswanathii	0	0	0	0	0	0	0	0	0	0	0	0	0	0	0	0	0	0	0	0	0	0	0	0	0	0	25	0	0	0	0	0	0	0	0	0	0	0	0	0	0	0	0	0	0	0	0	0	0
Ceratocystis cacaofunesta	0	0	10	0	0	0	0	0	0	0	0	0	0	0	0	0	0	0	0	87	0	0	0	0	0	0	0	0	0	0	0	0	0	0	0	0	0	0	0	0	0	0	0	0	0	0	48	0	0
Chaetomium thermophilum	0	0	24	0	0	0	0	0	0	0	0	0	0	0	0	0	0	0	0	16	0	0	0	0	0	8	0	0	0	0	0	0	0	0	0	0	0	0	0	0	0	0	0	0	0	0	8	0	0
Clavispora lusitaniae	0	0	0	0	0	0	0	0	0	0	2531	0	0	0	0	0	0	0	0	0	0	0	0	0	0	0	0	80	0	0	0	0	0	0	0	0	0	0	0	0	0	0	0	0	0	0	0	0	0
Colletotrichum acutatum	227	65	550	32	0	0	0	0	0	0	0	0	0	0	0	0	0	0	0	97	0	0	0	0	0	65	0	0	0	0	0	32	162	0	0	0	0	0	0	0	0	0	0	0	0	0	65	0	0
Colletotrichum lindemuthianum	81	0	81	0	0	0	0	0	0	0	0	0	0	0	0	0	0	0	0	108	0	0	0	0	0	0	0	0	0	0	0	0	0	0	0	0	0	0	0	0	0	0	0	0	0	0	27	0	0
Cordyceps militaris	30	0	90	0	0	0	0	0	0	0	0	0	0	0	0	0	0	0	0	60	0	0	0	0	0	0	0	0	0	0	0	0	0	0	0	0	0	0	0	0	0	0	0	0	0	0	30	0	0
Cryptococcus gattii	0	0	0	0	0	0	0	0	0	0	0	0	0	0	0	0	0	0	0	0	0	0	0	0	0	0	0	0	0	0	0	0	0	0	0	0	0	0	0	0	0	0	0	0	1	0	0	0	0
Cryptococcus neoformans	0	0	0	0	0	0	1	0	0	0	0	0	0	0	0	0	0	0	0	0	0	0	0	0	0	0	0	0	0	0	0	0	0	0	0	0	0	0	0	0	0	0	0	0	0	0	0	0	0
Cyberlindnera jadinii	0	0	0	0	0	0	0	0	0	0	0	0	0	0	0	0	0	0	0	0	0	0	0	0	0	0	0	0	0	0	0	0	0	0	0	0	0	0	0	0	0	0	0	0	0	0	0	0	0
Debaryomyces hansenii	0	0	0	0	0	0	0	0	0	0	0	0	0	0	0	0	0	0	0	0	0	0	0	0	0	0	0	0	0	0	0	0	0	0	0	0	0	0	0	0	0	0	0	0	0	0	0	0	34
Diaporthe longicolla	150	37	244	19	0	0	0	0	0	0	0	0	0	0	0	0	0	0	0	94	0	0	0	0	0	0	0	0	0	0	0	0	56	0	0	0	0	0	0	0	0	0	0	0	0	0	75	0	0
Epidermophyton floccosum	32	97	291	32	0	0	0	0	0	0	0	0	0	0	0	0	0	0	0	0	0	0	0	0	0	32	0	0	0	0	0	32	64	0	0	0	0	0	0	0	0	0	0	0	0	0	0	0	0
Fusarium circinatum	0	15	60	0	0	0	0	0	0	0	0	0	0	0	0	0	0	0	0	15	0	0	0	0	0	0	0	15	0	0	0	0	0	0	0	0	0	0	0	0	0	0	0	0	0	0	0	0	0
Fusarium graminearum	0	0	0	0	0	0	0	0	0	0	0	0	0	0	0	0	0	0	0	1	0	0	0	0	0	0	0	0	0	0	0	0	0	0	0	0	0	0	0	0	0	0	0	0	0	0	0	0	0
Fusarium oxysporum	58	29	174	0	0	0	0	0	0	0	0	0	0	0	0	0	0	0	0	29	0	0	0	0	0	0	0	0	0	0	0	0	58	0	0	0	0	0	0	0	0	0	29	0	0	0	0	0	0
Fusarium solani	16	0	16	0	0	0	0	0	32	0	0	0	0	0	0	0	0	0	0	48	0	0	0	0	0	0	0	0	0	0	0	0	0	0	0	0	0	0	0	0	0	0	0	0	0	0	32	0	0
Galactomyces candidum	0	0	0	0	0	0	0	0	0	0	0	0	0	0	0	0	0	0	0	0	0	0	0	0	0	0	0	0	0	0	0	0	0	0	0	0	0	0	0	379	0	0	0	0	0	0	0	0	0
Ganoderma sinense	0	0	0	0	0	0	0	0	0	0	0	0	0	0	0	0	0	0	0	0	0	0	0	0	0	0	0	0	0	0	0	0	0	0	0	12	0	0	0	0	0	0	0	0	0	0	0	0	0
Gibberella moniliformis	0	0	19	0	0	0	0	0	0	0	0	0	0	0	0	0	0	0	0	0	0	0	0	0	0	0	0	0	0	0	0	0	0	0	0	0	0	0	0	0	0	0	0	0	0	0	19	0	0
Glomus cerebriforme	0	17	0	0	0	0	0	0	0	0	0	0	0	0	0	0	0	0	0	0	0	0	0	0	0	0	17	0	0	0	0	0	0	0	0	0	0	0	0	0	0	0	0	0	0	0	0	0	0
Heterobasidion irregulare	0	9	0	0	0	0	0	0	0	0	0	0	0	0	0	0	0	0	0	0	0	0	0	0	0	0	0	0	0	0	0	0	0	0	0	0	0	0	0	0	0	0	0	0	0	0	0	0	0
Hirsutella minnesotensis	77	0	95	0	0	0	0	0	0	0	0	0	0	0	0	0	0	0	0	19	0	0	0	0	0	19	0	0	0	0	0	0	19	0	0	0	0	0	0	0	0	0	0	0	0	0	38	0	0
Hyaloraphidium curvatum	34	0	0	0	0	0	0	0	0	0	34	0	0	0	0	34	0	0	0	0	34	0	0	0	0	0	68	0	0	0	0	0	0	0	0	0	0	0	0	0	0	0	0	0	0	0	0	0	0
Trichoderma sp.	71	47	261	24	0	0	0	0	24	0	0	0	0	0	0	0	0	0	0	190	0	0	0	0	0	0	0	0	0	0	0	24	0	0	0	0	0	0	0	0	0	0	0	0	0	0	24	0	0
Kluyveromyces marxianus	22	0	0	22	0	0	0	0	0	0	0	0	0	0	0	0	0	0	0	0	0	0	0	0	0	0	0	0	0	0	0	0	0	0	0	0	0	0	0	0	0	0	0	0	0	0	0	0	0
Kluyveromyces thermotolerans	0	42	0	0	0	0	0	0	0	0	0	0	0	0	0	0	0	0	0	0	0	0	0	0	0	0	0	0	0	0	0	0	0	0	0	0	0	0	0	0	0	0	0	0	0	0	0	0	0
Lecanicillium muscarium	41	0	123	0	0	0	0	0	0	0	0	0	0	0	0	0	0	0	0	41	0	0	0	0	0	0	0	0	0	0	0	0	41	0	0	0	0	0	0	0	0	0	0	0	0	0	0	0	0
Madurella mycetomatis	22	0	22	0	0	0	0	0	0	0	0	0	0	0	0	0	0	0	0	44	0	0	0	0	0	0	0	0	0	0	0	22	0	0	0	0	0	0	0	0	0	0	0	0	0	0	44	0	0
Marssonina brunnea	114	14	241	0	0	0	0	0	0	0	0	0	0	0	0	0	0	0	0	28	0	0	0	0	0	0	14	0	0	0	0	14	28	0	0	0	0	0	0	0	0	0	0	0	0	0	0	0	0
Metacordyceps chlamydosporia	0	0	117	0	0	0	0	0	0	0	0	0	0	0	0	0	0	0	0	78	0	0	0	0	0	0	0	0	0	0	0	39	0	0	0	0	0	0	0	0	0	0	0	0	0	0	39	0	0
Metarhizium anisopliae	41	41	203	0	0	0	0	0	0	0	0	0	0	0	0	0	0	0	0	0	0	0	0	0	0	0	0	0	0	0	0	0	41	0	0	0	0	0	0	0	0	0	0	0	0	0	0	0	0
Microsporum canis	84	0	334	0	0	0	0	0	0	0	0	0	0	0	0	0	0	0	0	0	0	0	0	0	0	0	0	0	0	0	0	0	84	0	0	0	0	0	0	0	0	0	0	0	0	0	42	0	0
Moniliophthora perniciosa	0	0	0	0	0	0	0	0	0	0	0	0	0	0	0	0	0	0	0	0	0	0	0	0	0	0	0	0	0	0	0	0	0	0	0	0	0	0	0	0	0	0	0	0	0	0	0	0	0
Myceliophthora thermophila	0	0	0	0	0	0	0	0	0	0	0	0	0	0	0	0	0	0	0	1	0	0	0	0	0	0	0	0	0	0	0	0	0	0	0	0	0	0	0	0	0	0	0	0	0	0	0	0	0
Mycosphaerella graminicola	227	91	546	45	45	0	0	0	0	0	0	0	0	0	0	0	0	0	0	0	0	0	0	0	0	45	0	23	0	0	0	23	136	0	0	0	0	0	0	0	0	0	0	0	0	0	0	0	0
Naumovozyma dairenensis	0	0	1	0	0	1	0	0	0	0	0	0	0	0	0	0	0	0	0	0	0	0	0	0	0	0	0	1	0	0	0	0	0	0	0	1	0	0	0	0	0	0	1	0	0	0	0	0	0
Neurospora crassa	1	1	70	0	0	0	0	0	0	0	0	2	0	0	0	0	0	0	0	27	0	0	0	0	0	0	0	0	0	0	0	0	1	0	0	0	0	0	0	0	2	0	0	0	0	0	1	0	0
Paracoccidioides brasiliensis	98	28	266	28	0	0	0	0	0	0	0	0	0	0	0	0	0	0	0	14	0	0	0	0	0	14	14	0	0	0	0	14	56	0	0	0	0	0	0	0	0	0	0	0	0	0	14	0	0
Peltigera malacea	0	0	16	16	0	0	0	0	0	0	0	0	0	0	0	0	0	0	0	0	0	0	0	0	0	0	0	0	0	0	0	0	0	0	0	0	0	0	0	0	0	0	0	0	0	0	0	0	0
Peltigera membranacea	48	0	80	0	0	0	0	0	0	0	0	0	0	0	0	0	0	0	0	0	0	0	0	0	0	0	0	0	0	0	0	16	16	0	0	0	0	0	0	0	0	0	0	0	0	0	0	0	0
Penicillium digitatum	0	0	35	0	0	0	0	0	0	0	0	0	0	0	0	0	0	0	0	0	0	0	0	0	0	0	0	0	0	0	0	0	0	0	0	0	0	0	0	0	0	0	0	0	0	0	0	0	0
Penicillium roqueforti	167	0	201	67	0	0	0	0	0	0	0	0	0	0	0	0	0	0	0	0	0	0	0	0	0	0	0	0	0	0	0	0	66	0	0	0	0	0	0	0	0	0	0	0	0	0	0	0	0
Penicillium solitum	0	0	175	0	0	0	0	0	0	0	0	0	0	0	0	0	0	0	0	70	0	0	0	0	0	0	0	0	0	0	0	0	70	0	0	0	0	0	0	0	0	0	0	0	0	0	35	0	0
Phaeosphaeria nodorum	80	20	140	20	0	0	0	0	0	0	0	0	0	0	0	0	0	0	0	0	0	0	0	0	0	0	0	0	0	0	0	0	40	0	0	0	0	0	0	0	0	0	0	0	0	0	0	0	0
Phialocephala subalpina	137	46	503	23	0	0	0	0	0	0	0	0	0	0	0	0	0	0	0	0	0	0	0	0	0	46	0	0	0	0	0	0	69	0	0	0	0	0	0	0	0	0	0	0	0	0	0	0	0
Phlebia radiata	0	0	6	0	0	0	0	0	0	0	0	0	0	0	0	0	0	0	0	0	0	0	0	0	0	0	0	0	0	0	0	0	0	0	0	64	0	0	0	0	0	0	0	0	0	0	0	0	0
Pichia pastoris	0	0	0	0	0	0	0	0	0	0	0	0	0	0	0	0	0	0	0	0	0	0	0	0	0	0	0	0	0	0	0	0	0	0	0	0	0	0	0	0	0	0	2	0	0	0	0	0	0
Pleurotus ostreatus	0	0	27	0	0	0	0	0	0	0	0	0	0	0	0	0	0	0	0	0	0	0	0	0	0	0	14	0	0	0	0	0	0	0	0	0	0	0	0	0	0	0	0	0	0	0	0	0	0
Podospora anserina	40	0	120	0	0	0	0	0	0	0	0	0	0	0	0	0	0	0	0	0	0	0	0	0	0	0	10	0	0	0	0	0	30	0	0	0	0	0	0	0	0	0	0	0	0	0	0	0	0
Pseudogymnoascus pannorum	186	74	669	37	0	0	0	0	0	0	0	0	0	0	0	0	0	0	0	74	0	0	0	0	0	37	0	0	0	0	0	37	111	0	0	0	0	0	0	0	0	0	0	0	0	0	74	0	0
Rhynchosporium orthosporum	61	20	101	20	0	0	0	0	0	0	0	0	0	0	0	0	0	0	0	20	0	0	0	0	0	0	0	0	0	0	0	20	20	0	0	0	0	0	0	0	0	0	0	0	0	0	0	0	0
Rhynchosporium secalis	15	0	0	0	0	0	0	0	0	0	0	0	0	0	0	0	0	0	0	0	0	0	0	0	0	0	0	0	0	0	0	0	0	0	0	0	0	0	0	0	0	0	0	0	0	0	0	0	0
Saccharomyces cerevisiae	0	0	0	0	0	6	0	158	12	0	0	0	0	0	13	0	0	0	0	0	0	0	0	0	158	0	0	0	0	158	0	0	1931	0	0	0	0	0	0	12	0	0	0	0	7936	13	0	0	4725
Saccharomyces paradoxus	0	0	0	0	0	0	0	0	0	0	0	0	0	0	0	0	0	0	0	0	0	0	0	0	0	0	0	0	0	0	0	0	0	0	0	0	0	0	0	0	0	0	0	0	0	0	0	0	14
Sclerotinia borealis	39	15	89	10	0	0	0	0	0	0	0	5	0	0	0	0	0	0	0	0	0	0	0	0	0	10	0	0	0	0	0	0	5	0	0	0	0	0	0	0	0	0	0	0	0	0	0	0	0
Shiraia bambusicola	77	77	231	26	0	0	0	0	0	0	0	0	0	0	0	0	0	0	0	0	0	0	0	0	0	26	0	0	0	0	0	26	77	0	0	0	0	0	0	0	0	0	0	0	0	0	26	0	0
Sporothrix schenckii	74	0	295	37	0	0	0	0	0	0	0	0	0	0	0	0	0	0	0	74	0	0	0	0	0	0	0	0	0	0	0	37	37	0	0	0	0	0	0	0	0	0	0	0	0	0	74	0	0
Talaromyces marneffei	310	169	931	141	0	0	0	0	0	0	0	0	0	0	0	0	0	0	0	28	0	0	0	0	0	56	28	0	0	0	0	56	226	0	0	0	0	0	0	0	0	0	0	0	0	0	0	0	0
Thielavia terrestris	0	0	0	0	0	0	0	0	0	0	0	0	0	0	0	0	0	0	0	2	0	0	0	0	0	0	0	0	0	0	0	0	0	0	0	0	0	0	0	0	0	0	0	0	0	0	0	0	0
Trichophyton mentagrophytes	41	0	164	0	0	0	0	0	0	0	0	0	0	0	0	0	0	0	0	0	0	0	0	0	0	0	0	0	0	0	0	0	0	0	0	0	0	0	0	0	0	0	0	0	0	0	0	0	0
Trichophyton rubrum	0	0	74	0	0	0	0	0	0	0	0	0	0	0	0	0	0	0	0	0	0	0	0	0	0	0	0	0	0	0	0	0	0	0	0	0	0	0	0	0	0	0	0	0	0	0	37	0	0
Ustilago maydis	0	0	0	0	0	0	0	0	0	0	0	1	0	0	0	0	0	0	0	0	0	0	0	0	0	0	0	0	0	0	0	0	0	0	0	1	0	0	0	0	0	0	0	0	0	0	0	0	0
Verticillium dahliae	110	37	258	74	0	0	0	0	0	0	0	0	0	0	0	0	0	0	0	405	0	0	0	0	0	0	0	0	0	0	0	0	37	0	0	0	0	0	0	0	0	0	0	0	0	0	184	0	0
Yarrowia lipolytica	0	0	0	0	0	0	0	0	0	0	0	0	0	1	0	0	0	0	0	0	0	0	0	0	0	0	0	0	0	0	0	0	1	0	0	0	0	0	0	0	0	0	0	0	0	0	0	0	0
Zygosaccharomyces rouxii	0	0	0	0	0	0	0	0	0	0	0	0	0	0	0	0	0	0	0	0	0	1	0	0	0	0	0	0	0	0	0	0	0	0	0	0	0	0	0	0	0	0	0	0	0	0	0	0	0
Total	4218	2138	15105	1514	201	13	30	158	206	0	2892	8	0	1	13	615	1	103	37	1941	99	2	0	0	4022	1706	445	124	2	160	0	550	4949	136	29	194	47	0	27	391	2	1	61	0	8203	27001	1020	0	4775
[truncated: 14 more columns]
